# Supplementary material
Source: PubMed Central journal article supplement (PMC7159103)
Supplement: CJOC-31-1199-s001.pdf [file CJOC-31-1199-s001.pdf]

S20120912-028

20120912

PROTON DMSO D:\nmr\_data ham

8.206  
8.203  
8.194  
8.191  
8.181  
8.178  
8.171  
8.168  
7.642  
7.624  
7.622  
7.604  
7.417  
7.396  
7.390  
7.380  
7.378  
7.368  
7.236  
6.623

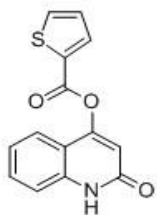

1

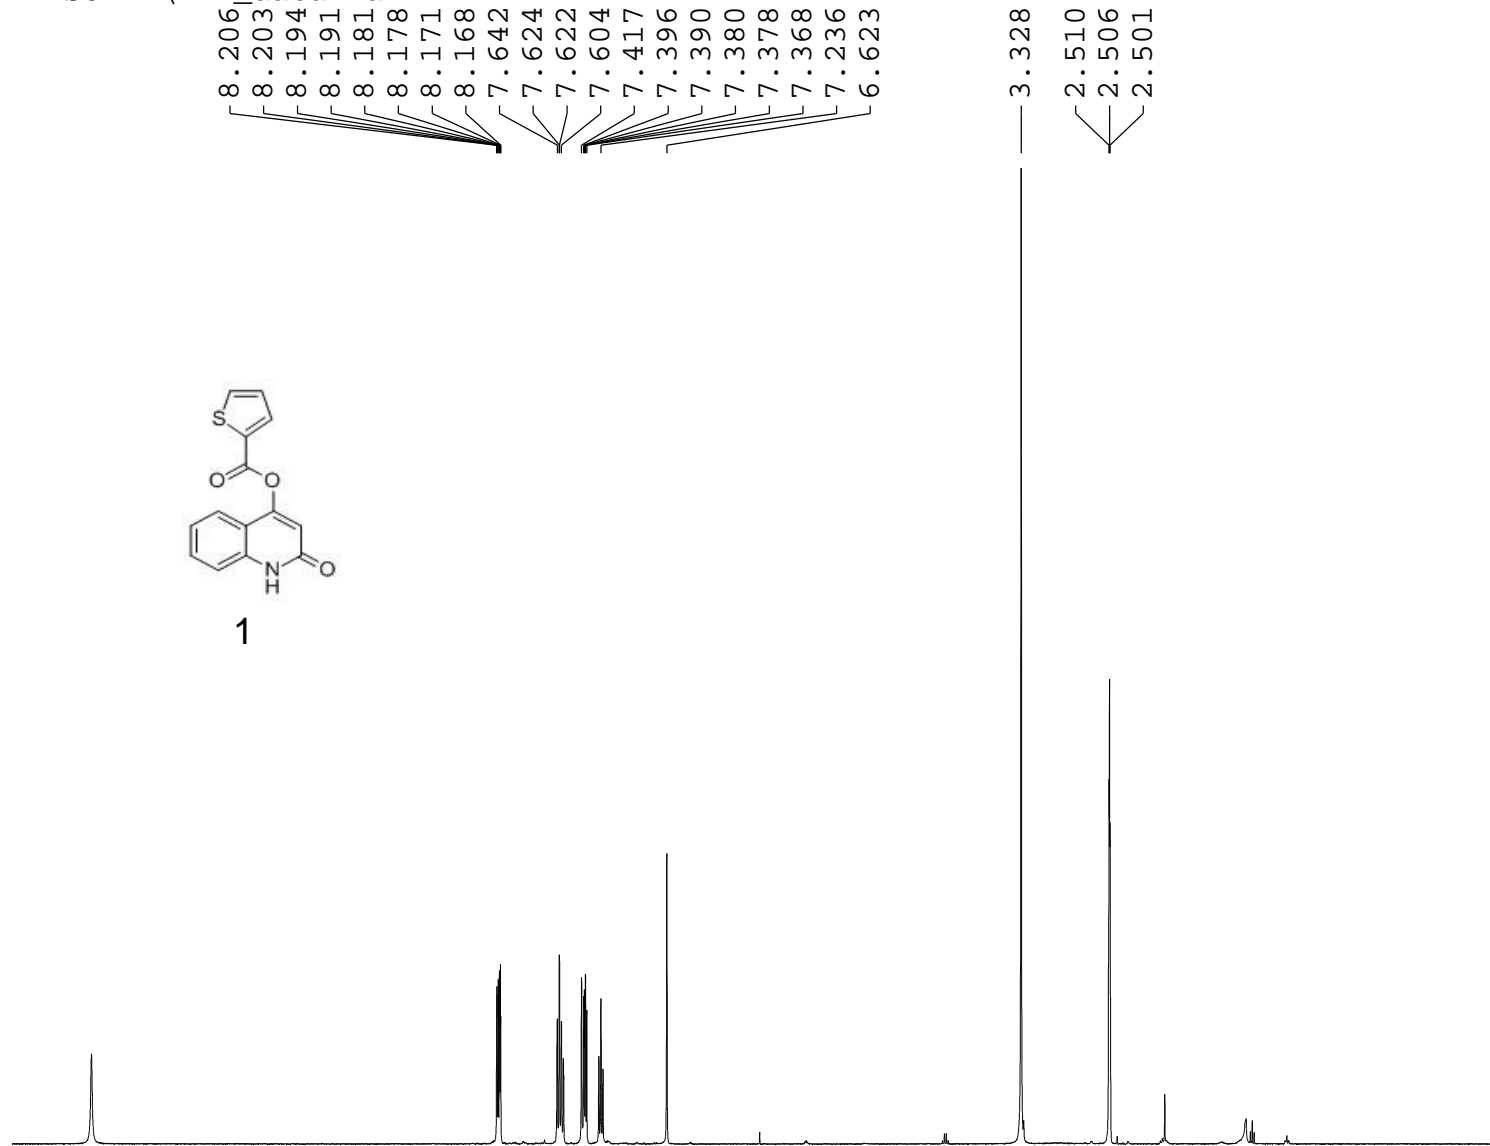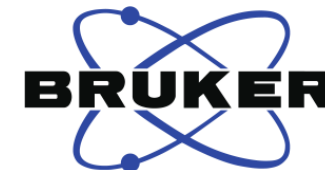

Current Data Parameters  
NAME ZFKLT  
EXPNO 10  
PROCNO 1

F2 - Acquisition Parameters  
Date\_ 20120912  
Time 20.44  
INSTRUM spect  
PROBHD 5 mm PABBO BB-  
PULPROG zg30  
TD 65536  
SOLVENT DMSO  
NS 16  
DS 2  
SWH 8223.685 Hz  
FIDRES 0.125483 Hz  
AQ 3.9846387 sec  
RG 203  
DW 60.800 usec  
DE 6.50 usec  
TE 298.0 K  
D1 1.00000000 sec

==== CHANNEL f1 =====  
NUC1 1H  
P1 14.50 usec  
PLW1 12.85299969 W  
SFO1 400.1324710 MHz

F2 - Processing parameters  
SI 65536  
SF 400.1300000 MHz  
WDW EM  
SSB 0  
LB 0.30 Hz  
GB 0  
PC 1.00

0.92

1.87

1.96

1.98

1.00

1

3.328

2.510

2.506

2.501

ppm

S20121106-068

20121107

C13CPD DMSO D:\nmr\_data ham

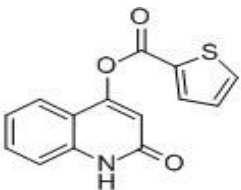

1

162.62  
159.08  
155.91  
139.42  
136.86  
136.67  
132.09  
131.13  
129.52  
122.73  
122.53  
116.10  
115.14  
112.97

40.62  
40.41  
40.20  
39.99  
39.78  
39.58  
39.37

— 0.59

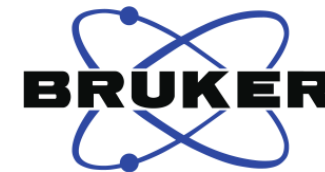

Current Data Parameters  
NAME S5  
EXPNO 10  
PROCNO 1

F2 - Acquisition Parameters  
Date\_ 20121107  
Time 22.09  
INSTRUM spect  
PROBHD 5 mm PABBO BB-  
PULPROG zgpg30  
TD 65536  
SOLVENT DMSO  
NS 1024  
DS 4  
SWH 24038.461 Hz  
FIDRES 0.366798 Hz  
AQ 1.3631988 sec  
RG 203  
DW 20.800 usec  
DE 6.50 usec  
TE 298.4 K  
D1 2.0000000 sec  
D11 0.0300000 sec

==== CHANNEL f1 =====  
NUC1 13C  
P1 9.65 usec  
PLW1 49.65900040 W  
SFO1 100.6228293 MHz

==== CHANNEL f2 =====  
CPDPRG2 waltz16  
NUC2 1H  
PCPD2 90.00 usec  
PLW2 12.85299969 W  
PLW12 0.34196001 W  
PLW13 0.27699000 W  
SFO2 400.1316005 MHz

F2 - Processing parameters  
SI 32768  
SF 100.6127690 MHz  
WDW EM  
SSB 0  
LB 1.00 Hz  
GB 0  
PC 1.40

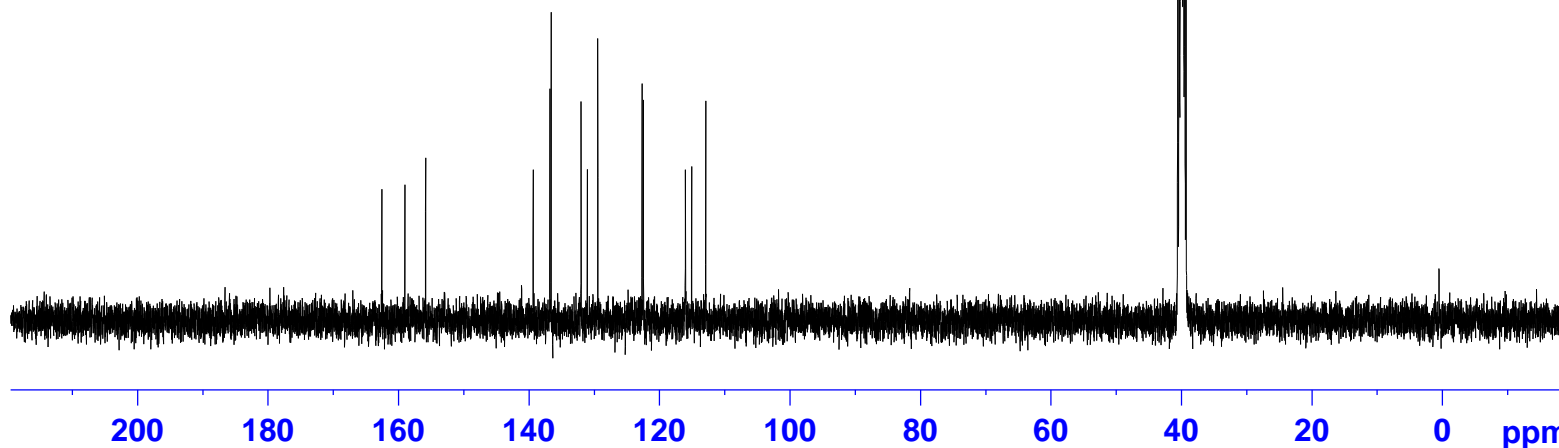

### Spectrum Graph

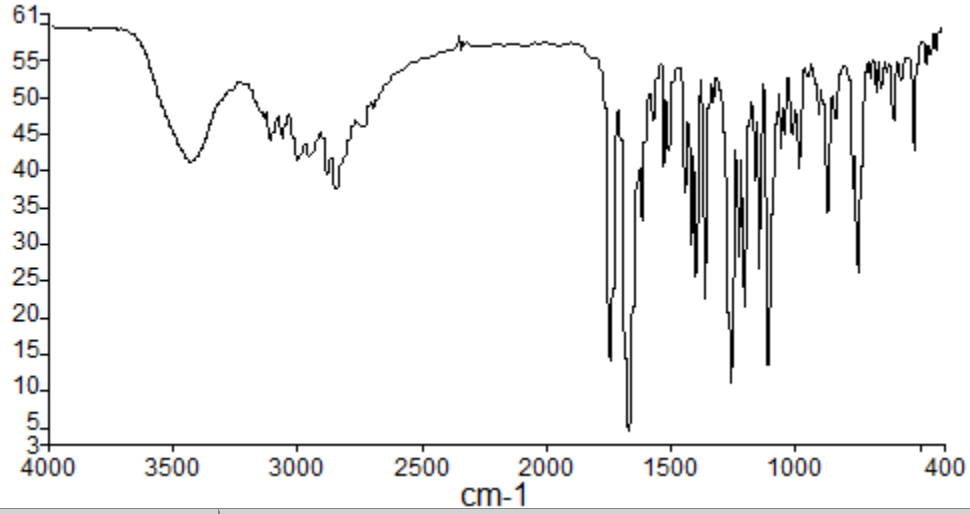

| 名称               | 说明 |
|------------------|----|
| S20121127-057-S6 |    |

### Search Result Peak Table Results

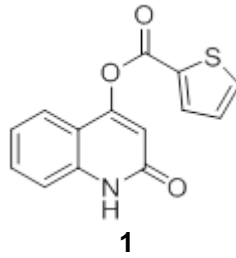

| 频谱名              |
|------------------|
| S20121127-019-S6 |

| 峰值名 | X      | Y     |
|-----|--------|-------|
| 48  | 420.22 | 56.74 |
| 47  | 446.25 | 56.15 |
| 46  | 465.5  | 54.84 |
| 45  | 512.56 | 42.96 |
| 44  | 527.26 | 52.83 |
| 43  | 568.27 | 52.69 |
| 42  | 595.43 | 47.24 |
| 41  | 627.95 | 53.59 |
| 40  | 646.39 | 51.63 |

|    |         |       |
|----|---------|-------|
| 39 | 666.19  | 50.92 |
| 38 | 688.43  | 52.96 |
| 37 | 732.84  | 26.27 |
| 36 | 745.51  | 29.09 |
| 35 | 761.14  | 37.76 |
| 34 | 831.6   | 47.35 |
| 33 | 864.05  | 34.32 |
| 32 | 900.78  | 48.12 |
| 31 | 942     | 53.19 |
| 30 | 978.16  | 40.71 |
| 29 | 993.29  | 46.92 |
| 28 | 1005.23 | 45.18 |
| 27 | 1033.18 | 45.23 |
| 26 | 1047.51 | 43.26 |
| 25 | 1102.79 | 13.59 |
| 24 | 1140.16 | 26.74 |
| 23 | 1156.51 | 39.04 |
| 22 | 1196.3  | 21.43 |
| 21 | 1223.9  | 28.51 |
| 20 | 1255.69 | 11.06 |
| 19 | 1323.72 | 49.58 |
| 18 | 1355.56 | 22.54 |
| 17 | 1397.41 | 25.63 |
| 16 | 1413.05 | 30.13 |
| 15 | 1437.55 | 37.09 |
| 14 | 1505.56 | 43.15 |
| 13 | 1523.1  | 40.64 |
| 12 | 1565.42 | 47.31 |
| 11 | 1610.24 | 33.41 |
| 10 | 1670.28 | 4.3   |
| 9  | 1737.21 | 14.06 |
| 8  | 2346.14 | 56.66 |
| 7  | 2851.52 | 37.69 |
| 6  | 2885.74 | 39.85 |
| 5  | 2961.37 | 42.28 |
| 4  | 3005.11 | 41.64 |
| 3  | 3067.6  | 44.73 |
| 2  | 3112.97 | 44.48 |
| 1  | 3435.76 | 41.51 |

S20120919-015

20120919

PROTON DMSO D:\nmr\_data ham

11.97

8.242  
8.241  
8.223  
8.220  
7.822  
7.804  
7.692  
7.672  
7.653  
7.639  
7.621  
7.601  
7.583  
7.424  
7.403  
7.240  
7.220  
7.202  
6.619

3.328

2.510  
2.505  
2.501

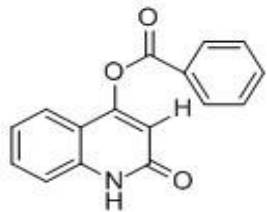

2

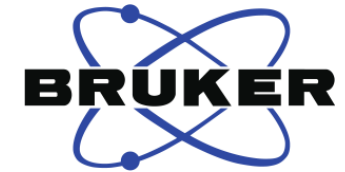

Current Data Parameters  
NAME SYPN-07  
EXPNO 10  
PROCNO 1

F2 - Acquisition Parameters  
Date\_ 20120919  
Time 11.06  
INSTRUM spect  
PROBHD 5 mm PABBO BB-  
PULPROG zg30  
TD 65536  
SOLVENT DMSO  
NS 16  
DS 2  
SWH 8223.685 Hz  
FIDRES 0.125483 Hz  
AQ 3.9846387 sec  
RG 203  
DW 60.800 usec  
DE 6.50 usec  
TE 298.0 K  
D1 1.0000000 sec

==== CHANNEL f1 =====  
NUC1 1H  
P1 14.50 usec  
PLW1 12.85299969 W  
SFO1 400.1324710 MHz

F2 - Processing parameters  
SI 65536  
SF 400.1300000 MHz  
WDW EM  
SSB 0  
LB 0.30 Hz  
GB 0  
PC 1.00

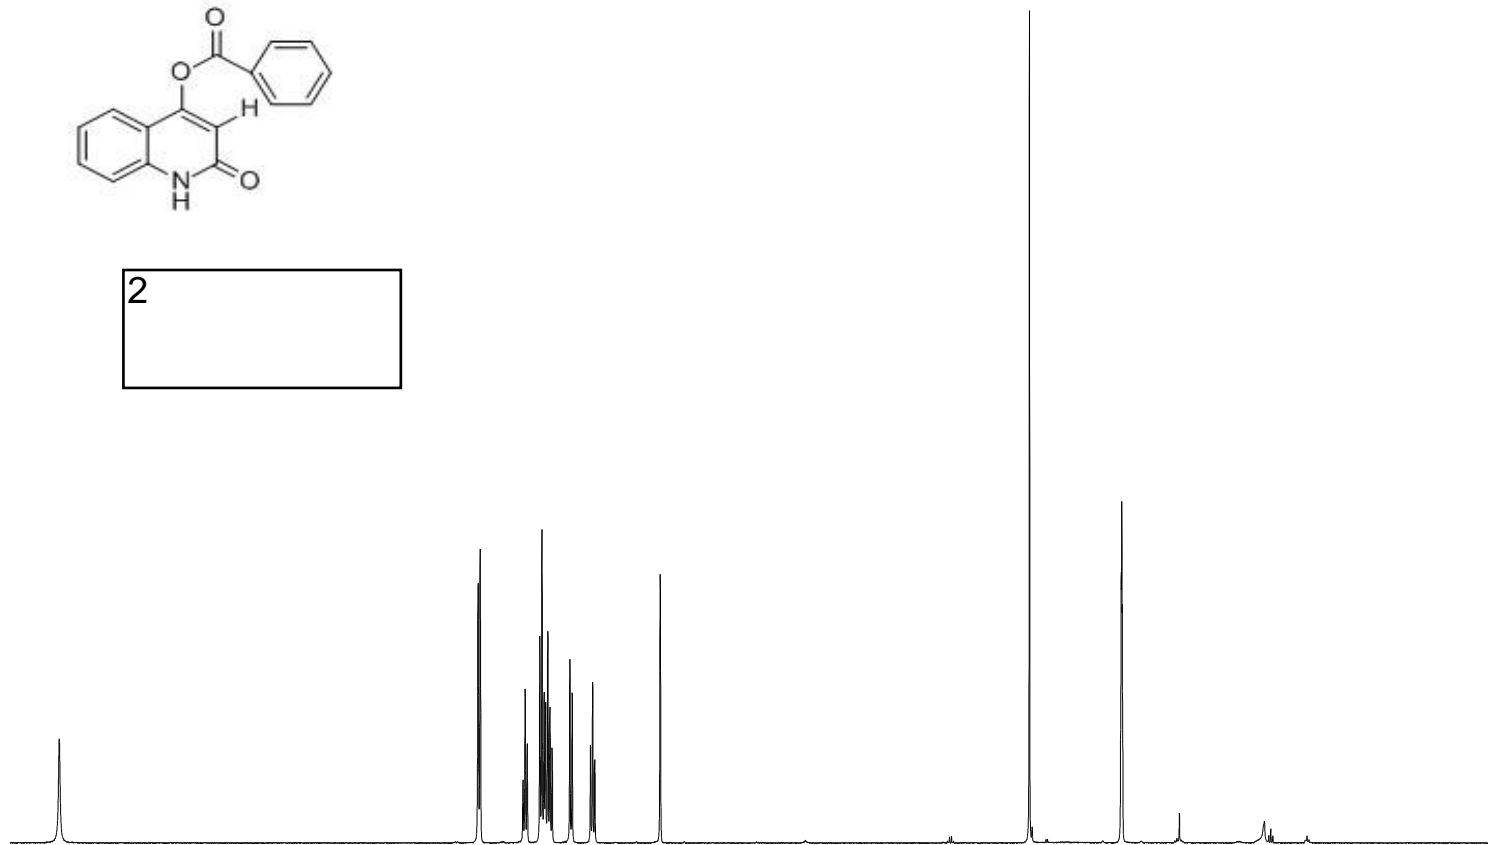

12 11 10 9 8 7 6 5 4 3 2 1 0 ppm

0.94  
1.97  
1.00  
3.98  
1.01  
1.01  
0.90

S20121106-079

20121108

C13CPD DMSO D:\nmr\_data ham

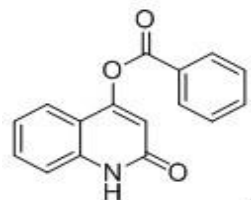

2

163.77  
162.68  
156.53  
139.44  
135.11  
132.04  
130.61  
129.67  
128.43  
122.69  
116.08  
115.26  
113.08

40.62  
40.41  
40.20  
39.99  
39.78  
39.57  
39.36

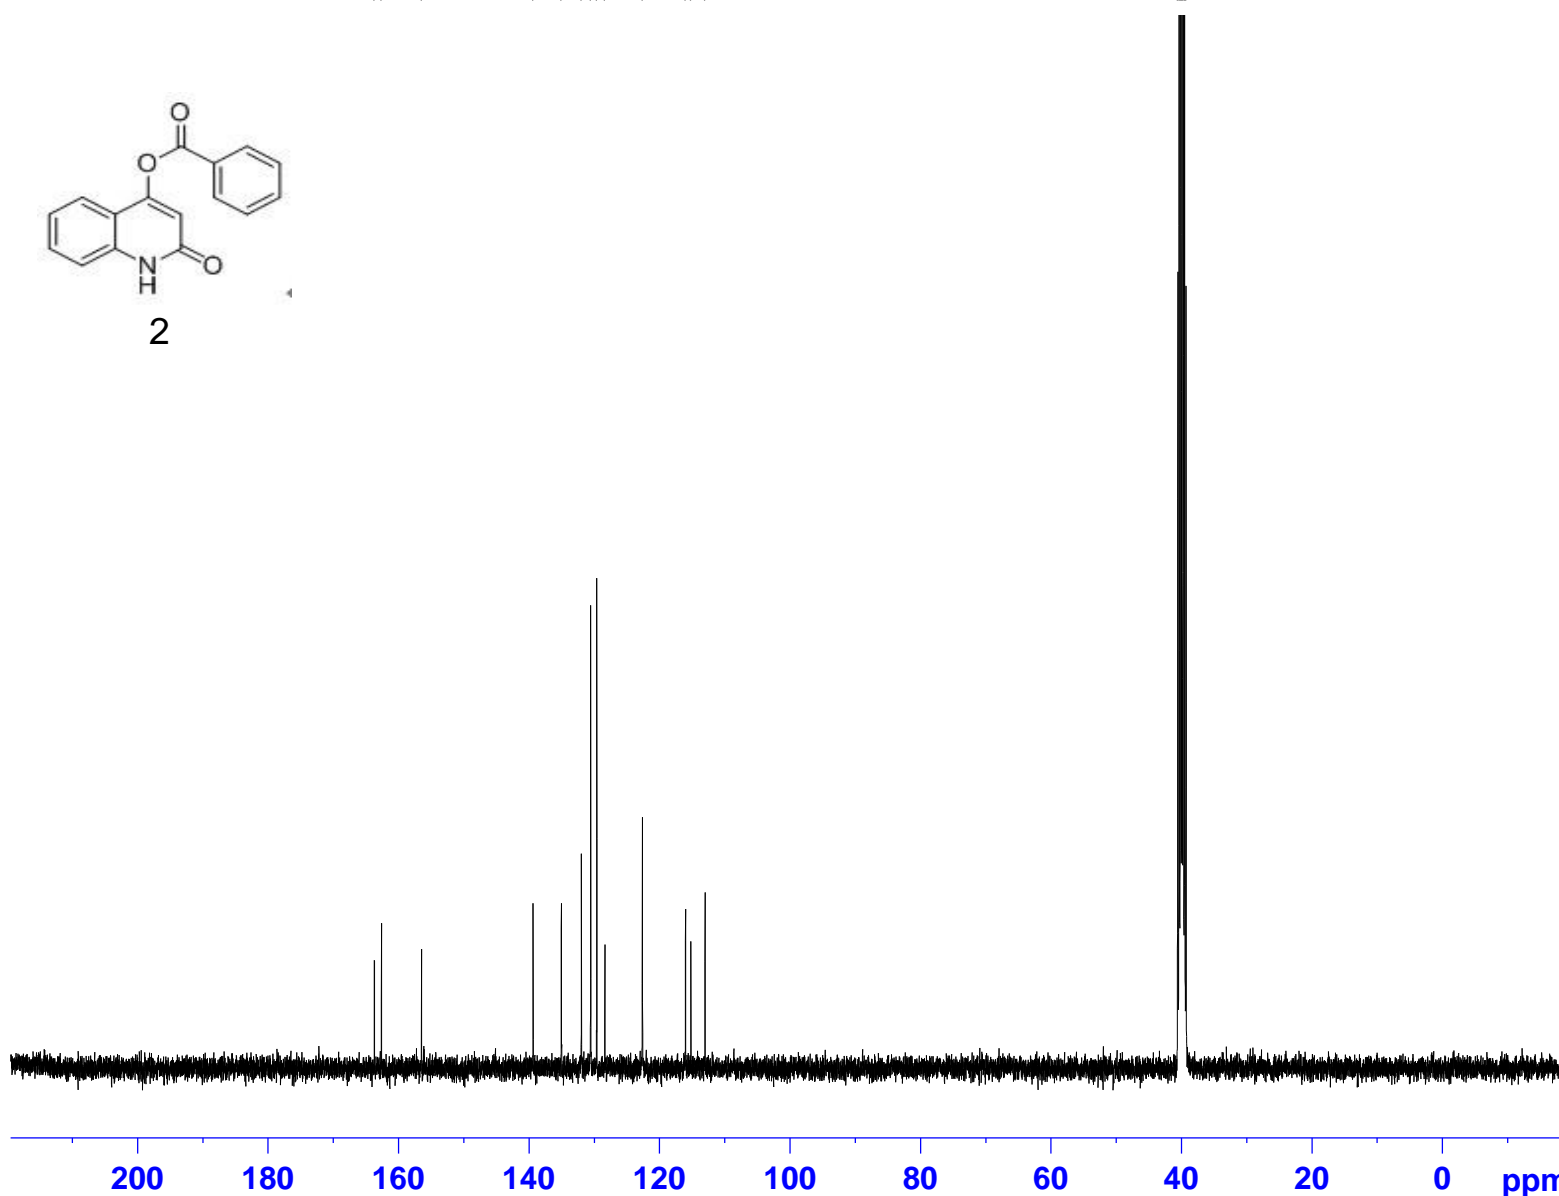

Current Data Parameters  
NAME S-13  
EXPNO 10  
PROCNO 1

F2 - Acquisition Parameters  
Date\_ 20121108  
Time 21.01  
INSTRUM spect  
PROBHD 5 mm PABBO BB-  
PULPROG zgpg30  
TD 65536  
SOLVENT DMSO  
NS 1024  
DS 4  
SWH 24038.461 Hz  
FIDRES 0.366798 Hz  
AQ 1.3631988 sec  
RG 203  
DW 20.800 usec  
DE 6.50 usec  
TE 298.0 K  
D1 2.00000000 sec  
D11 0.03000000 sec

==== CHANNEL f1 =====  
NUC1 13C  
P1 9.65 usec  
PLW1 49.65900040 W  
SFO1 100.6228293 MHz

==== CHANNEL f2 =====  
CPDPRG2 waltz16  
NUC2 1H  
PCPD2 90.00 usec  
PLW2 12.85299969 W  
PLW12 0.34196001 W  
PLW13 0.27699000 W  
SFO2 400.1316005 MHz

F2 - Processing parameters  
SI 32768  
SF 100.6127690 MHz  
WDW EM  
SSB 0  
LB 1.00 Hz  
GB 0  
PC 1.40

Spectrum Graph

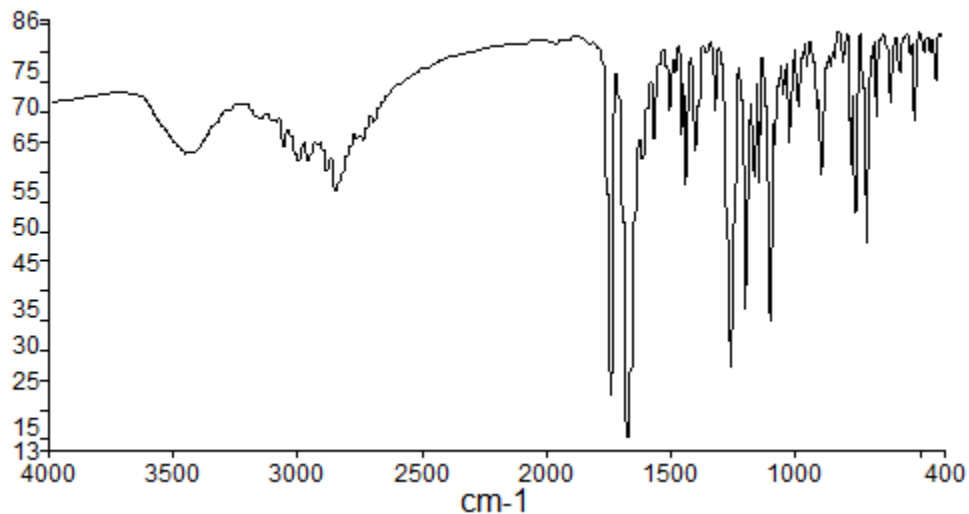

| 名称                | 说明 |
|-------------------|----|
| S20121127-063-S13 |    |

Search Result  
Peak Table Results

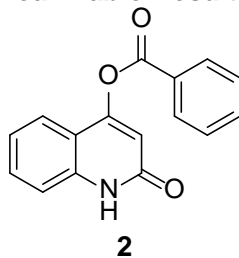

| 频谱名                   |
|-----------------------|
| S20121127-063-S13_001 |

| 峰值名 | X      | Y     |
|-----|--------|-------|
| 37  | 424.88 | 75.92 |
| 36  | 471.73 | 80.36 |
| 35  | 512.49 | 69.11 |
| 34  | 570.99 | 77.07 |
| 33  | 609    | 72.11 |
| 32  | 664.96 | 69.8  |
| 31  | 708.31 | 48.1  |
| 30  | 749.16 | 53.51 |
| 29  | 768.2  | 61.5  |
| 28  | 801.24 | 78.7  |

|    |         |       |
|----|---------|-------|
| 27 | 887.82  | 60.01 |
| 26 | 944.6   | 77.97 |
| 25 | 979.91  | 71.54 |
| 24 | 1020.13 | 65.25 |
| 23 | 1039.3  | 73.47 |
| 22 | 1071.12 | 65.07 |
| 21 | 1093.26 | 35.14 |
| 20 | 1142.11 | 58.68 |
| 19 | 1157.77 | 59.47 |
| 18 | 1195.7  | 36.94 |
| 17 | 1251.15 | 27.2  |
| 16 | 1313.48 | 70.75 |
| 15 | 1396.56 | 64.07 |
| 14 | 1437.8  | 57.82 |
| 13 | 1452    | 66.65 |
| 12 | 1480.97 | 76.95 |
| 11 | 1507.52 | 70.63 |
| 10 | 1567.23 | 65.57 |
| 9  | 1612.1  | 62.14 |
| 8  | 1671.27 | 15.02 |
| 7  | 1740.3  | 22.22 |
| 6  | 2849.8  | 57    |
| 5  | 2889.43 | 60.44 |
| 4  | 2961.47 | 62.07 |
| 3  | 3006.96 | 61.96 |
| 2  | 3064.01 | 64.52 |
| 1  | 3461.94 | 63.38 |



S20120925-058

20120925

PROTON DMSO D<sub>2</sub>O \nmr\_data ham



Current Data Parameters  
NAME SYP-N-12  
EXPNO 10  
PROCNO 1

F2 - Acquisition Parameters  
Date\_ 20120925  
Time 17.46  
INSTRUM spect  
PROBHD 5 mm PABBO BB-  
PULPROG zg30  
TD 65536  
SOLVENT DMSO  
NS 16  
DS 2  
SWH 8223.685 Hz  
FIDRES 0.125483 Hz  
AQ 3.9846387 sec  
RG 203  
DW 60.800 usec  
DE 6.50 usec  
TE 298.0 K  
D1 1.00000000 sec

==== CHANNEL f1 =====  
NUC1 1H  
P1 14.50 usec  
PLW1 12.85299969 W  
SFO1 400.1324710 MHz

F2 - Processing parameters  
SI 65536  
SF 400.1300000 MHz  
WDW EM  
SSB 0  
LB 0.30 Hz  
GB 0  
PC 1.00

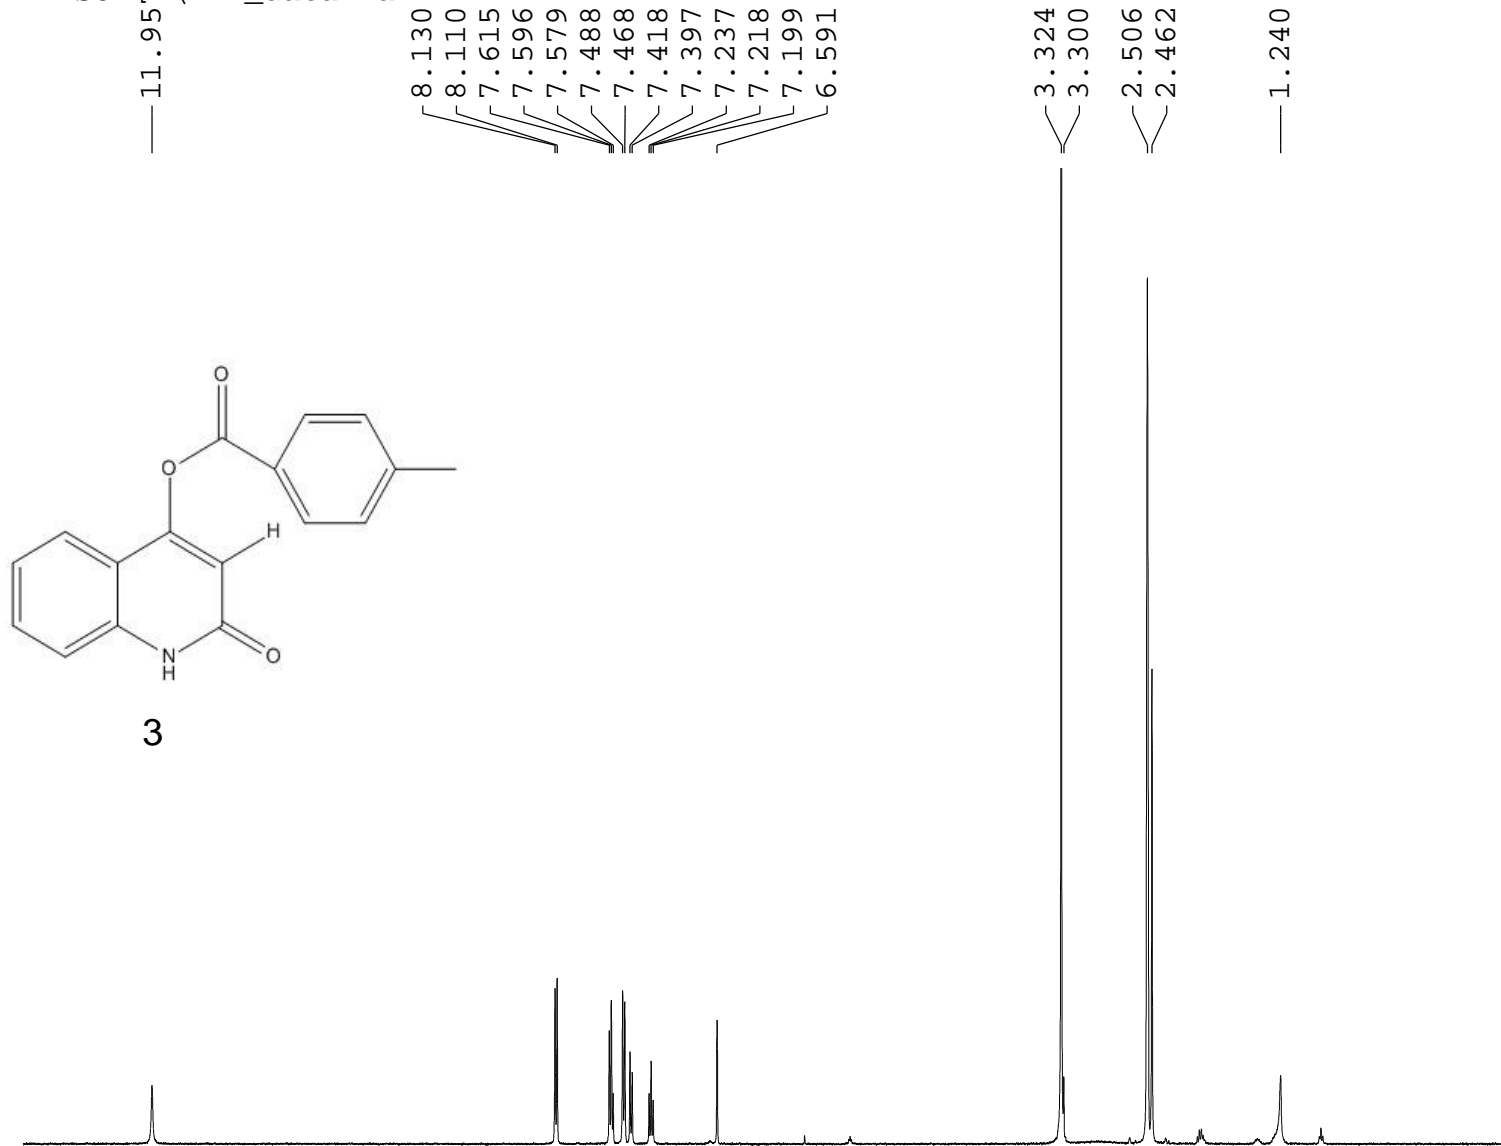

13 12 11 10 9 8 7 6 5 4 3 2 1 0 ppm

0.95

1.96  
1.97  
1.98  
1.00  
1.05  
0.84

2.96

11.957

8.130  
8.110  
7.615  
7.596  
7.579  
7.488  
7.468  
7.418  
7.397  
7.237  
7.218  
7.199  
6.591

3.324  
3.300  
2.506  
2.462

1.240

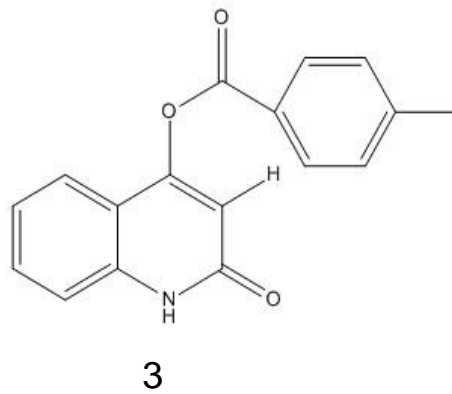

S20121106-073

20121107

C13CPD DMSO D:\nmr\_data ham

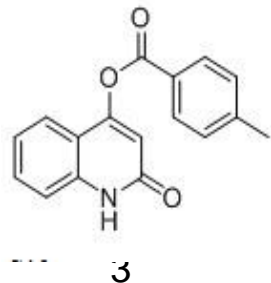

163.73  
162.69  
156.55  
145.78  
139.43  
132.02  
130.67  
130.23  
125.64  
122.67  
116.08  
115.31  
113.03

40.62  
40.41  
40.20  
39.99  
39.78  
39.58  
39.37  
21.80

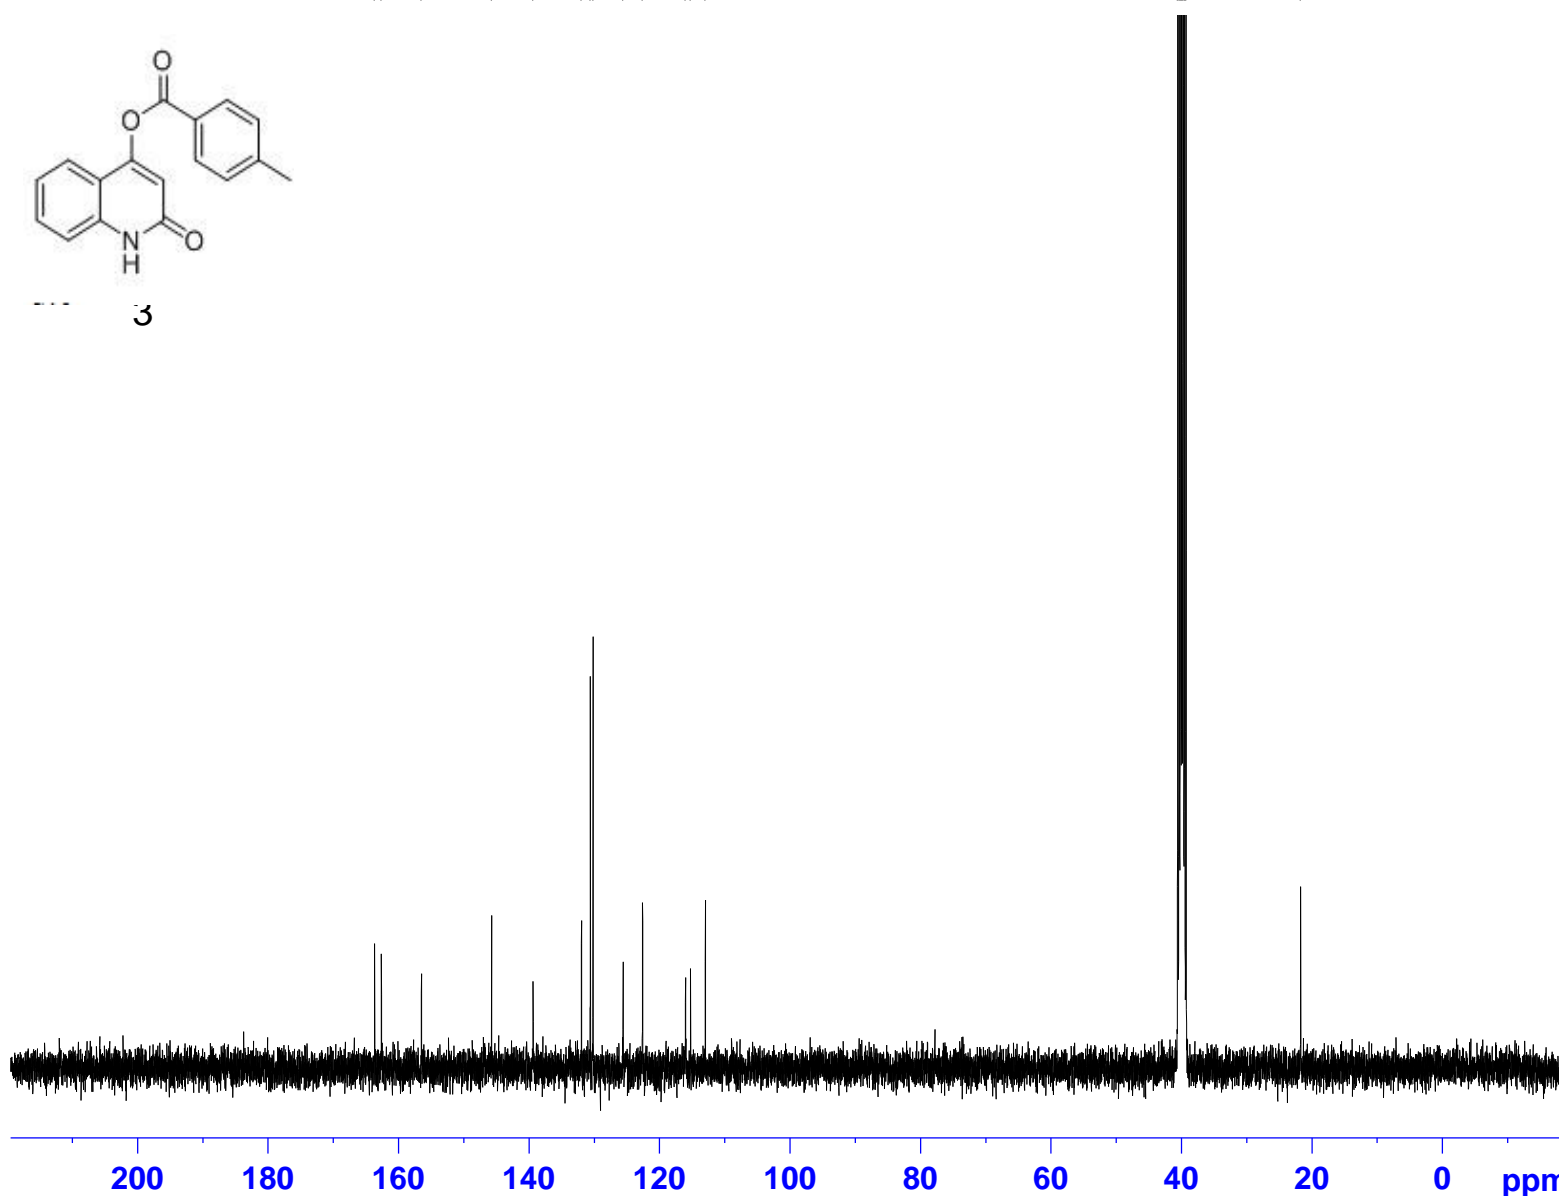

Current Data Parameters  
NAME S10  
EXPNO 10  
PROCNO 1

F2 - Acquisition Parameters  
Date\_ 20121108  
Time 3.15  
INSTRUM spect  
PROBHD 5 mm PABBO BB-  
PULPROG zgpg30  
TD 65536  
SOLVENT DMSO  
NS 1024  
DS 4  
SWH 24038.461 Hz  
FIDRES 0.366798 Hz  
AQ 1.3631988 sec  
RG 203  
DW 20.800 usec  
DE 6.50 usec  
TE 298.6 K  
D1 2.0000000 sec  
D11 0.0300000 sec

==== CHANNEL f1 =====  
NUC1 13C  
P1 9.65 usec  
PLW1 49.65900040 W  
SFO1 100.6228293 MHz

==== CHANNEL f2 =====  
CPDPRG2 waltz16  
NUC2 1H  
PCPD2 90.00 usec  
PLW2 12.85299969 W  
PLW12 0.34196001 W  
PLW13 0.27699000 W  
SFO2 400.1316005 MHz

F2 - Processing parameters  
SI 32768  
SF 100.6127690 MHz  
WDW EM  
SSB 0  
LB 1.00 Hz  
GB 0  
PC 1.40

Spectrum Graph

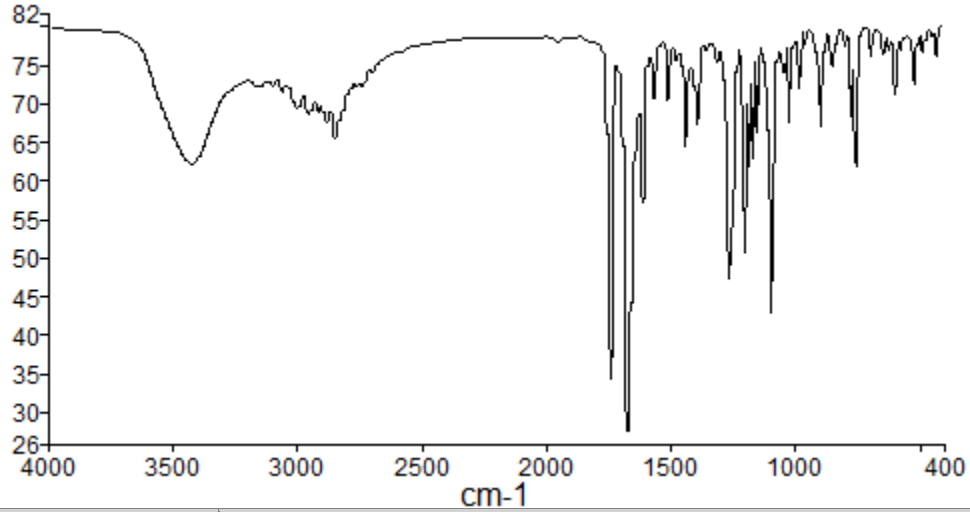

| 名称                | 说明 |
|-------------------|----|
| S20121127-075-S10 |    |

Search Result  
Peak Table Results

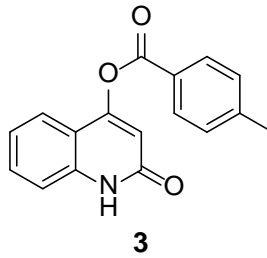

| 频谱名               |
|-------------------|
| S20121127-075-S10 |

| 峰值名 | X      | Y     |
|-----|--------|-------|
| 34  | 426.19 | 76.45 |
| 33  | 480.97 | 77.08 |
| 32  | 512.8  | 72.89 |
| 31  | 590.14 | 71.63 |
| 30  | 643.62 | 76.77 |
| 29  | 691.94 | 76.39 |
| 28  | 742.76 | 62.12 |
| 27  | 751.32 | 62.99 |
| 26  | 767.69 | 68.56 |
| 25  | 833.74 | 75.26 |

|    |         |       |
|----|---------|-------|
| 24 | 845.65  | 75.76 |
| 23 | 886.09  | 67.22 |
| 22 | 978.53  | 72.16 |
| 21 | 1016.1  | 67.95 |
| 20 | 1039.72 | 74.43 |
| 19 | 1091.74 | 42.91 |
| 18 | 1142.49 | 66.5  |
| 17 | 1161.23 | 63.29 |
| 16 | 1182.97 | 62.04 |
| 15 | 1196.47 | 50.75 |
| 14 | 1256.74 | 47.3  |
| 13 | 1309.84 | 75.65 |
| 12 | 1393.33 | 67.52 |
| 11 | 1438.06 | 64.69 |
| 10 | 1509.23 | 70.78 |
| 9  | 1566.96 | 70.99 |
| 8  | 1610.31 | 57.34 |
| 7  | 1671.89 | 27.26 |
| 6  | 1739.86 | 33.98 |
| 5  | 2853.51 | 65.74 |
| 4  | 2890.67 | 67.97 |
| 3  | 2963.5  | 68.98 |
| 2  | 3013.57 | 69.68 |
| 1  | 3435.52 | 62.44 |

S20120925-063

20120925

PROTON DMSO D:\nmr\_data ham

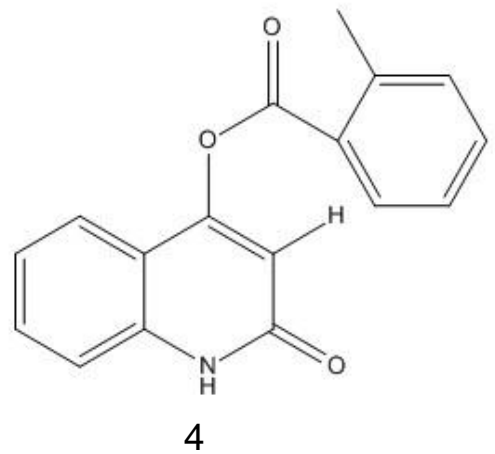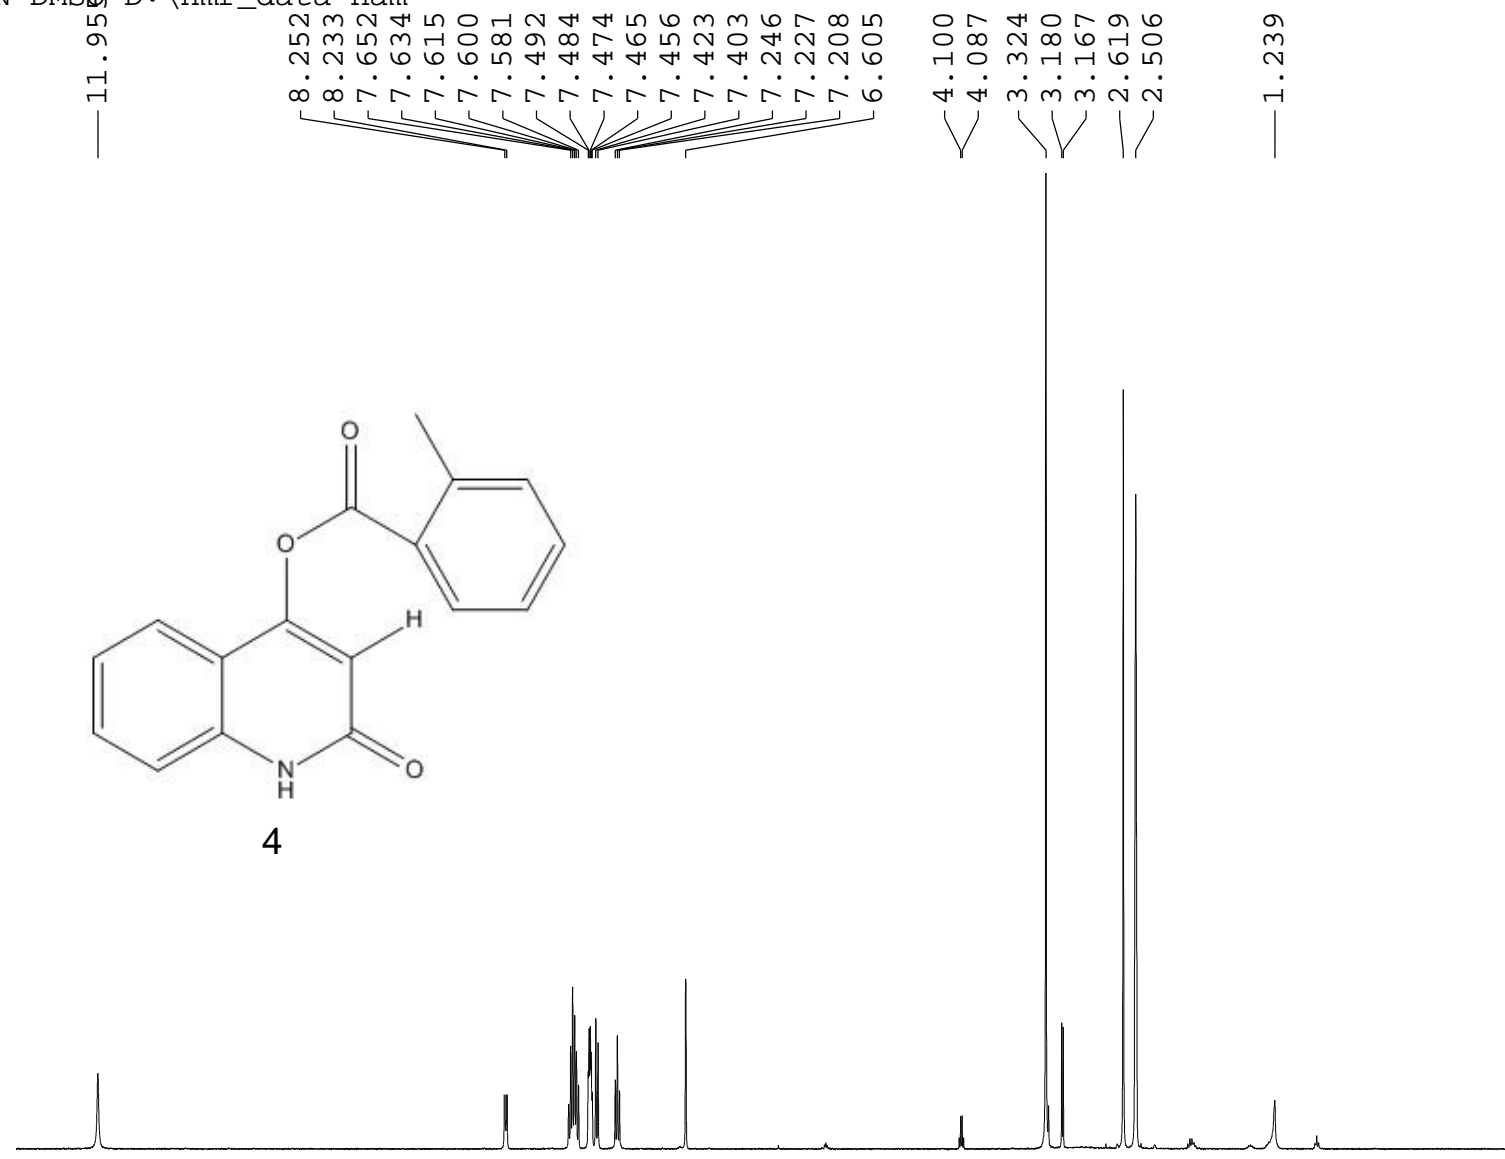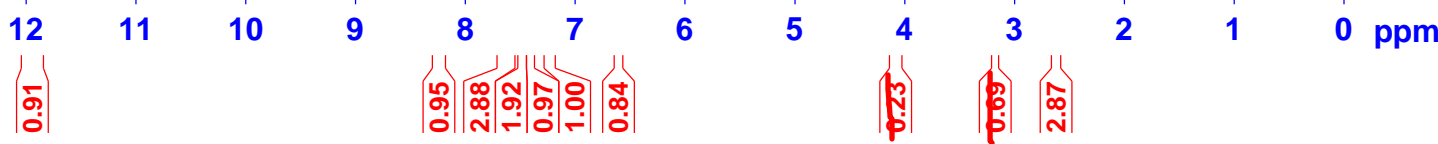

Current Data Parameters  
NAME SYP-N-17  
EXPNO 10  
PROCNO 1

F2 - Acquisition Parameters  
Date\_ 20120925  
Time 18.05  
INSTRUM spect  
PROBHD 5 mm PABBO BB-  
PULPROG zg30  
TD 65536  
SOLVENT DMSO  
NS 16  
DS 2  
SWH 8223.685 Hz  
FIDRES 0.125483 Hz  
AQ 3.9846387 sec  
RG 203  
DW 60.800 usec  
DE 6.50 usec  
TE 298.0 K  
D1 1.00000000 sec

==== CHANNEL f1 =====  
NUC1 1H  
P1 14.50 usec  
PLW1 12.85299969 W  
SFO1 400.1324710 MHz

F2 - Processing parameters  
SI 65536  
SF 400.1300000 MHz  
WDW EM  
SSB 0  
LB 0.30 Hz  
GB 0  
PC 1.00

S20121106-081

20121108

C13CPD DMSO D:\nmr\_data ham

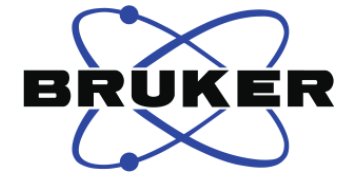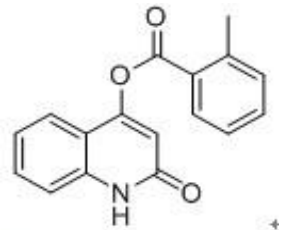

4

163.10  
162.73  
159.72  
156.64  
139.45  
135.75  
132.37  
131.96  
122.81  
122.66  
120.89  
117.97  
116.05  
115.36  
113.41  
112.90

56.53  
55.37  
40.61  
40.40  
40.20  
39.99  
39.78  
39.57  
39.36

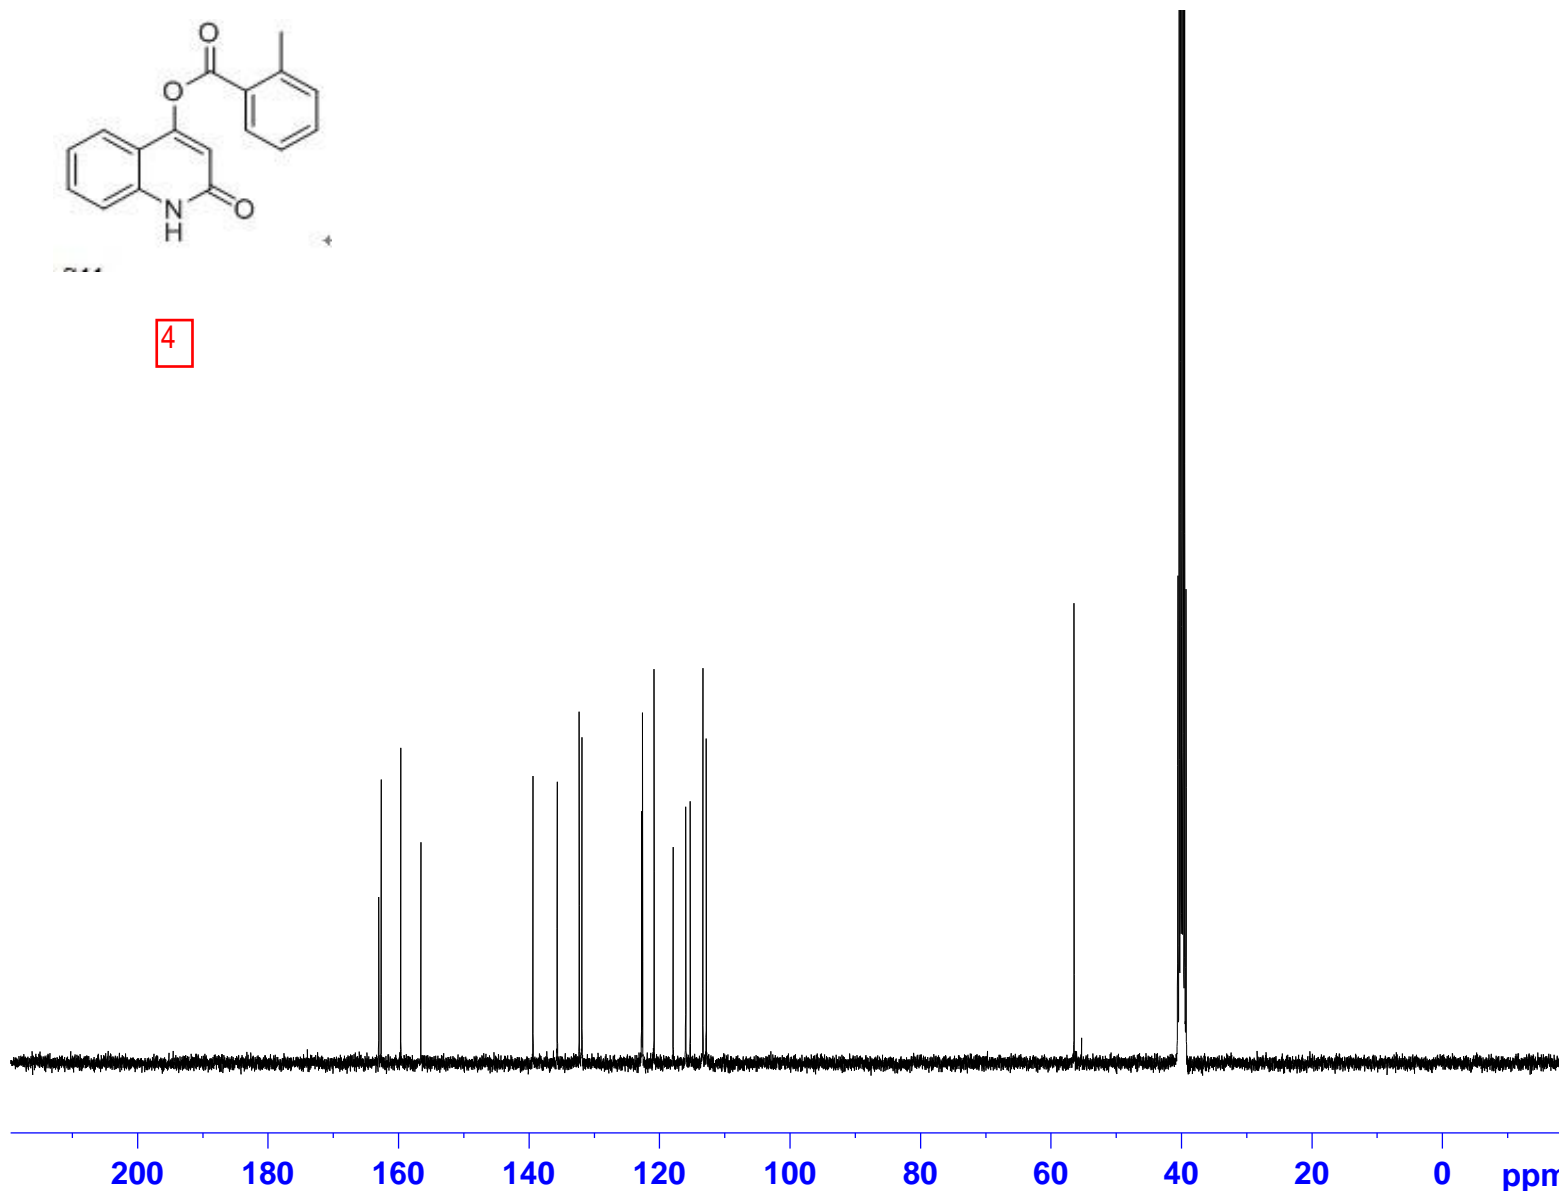

Current Data Parameters  
NAME S-11  
EXPNO 10  
PROCNO 1

F2 - Acquisition Parameters  
Date\_ 20121108  
Time 18.59  
INSTRUM spect  
PROBHD 5 mm PABBO BB-  
PULPROG zgpg30  
TD 65536  
SOLVENT DMSO  
NS 1024  
DS 4  
SWH 24038.461 Hz  
FIDRES 0.366798 Hz  
AQ 1.3631988 sec  
RG 203  
DW 20.800 usec  
DE 6.50 usec  
TE 298.0 K  
D1 2.0000000 sec  
D11 0.0300000 sec

==== CHANNEL f1 =====  
NUC1 13C  
P1 9.65 usec  
PLW1 49.65900040 W  
SFO1 100.6228293 MHz

==== CHANNEL f2 =====  
CPDPRG2 waltz16  
NUC2 1H  
PCPD2 90.00 usec  
PLW2 12.85299969 W  
PLW12 0.34196001 W  
PLW13 0.27699000 W  
SFO2 400.1316005 MHz

F2 - Processing parameters  
SI 32768  
SF 100.6127690 MHz  
WDW EM  
SSB 0  
LB 1.00 Hz  
GB 0  
PC 1.40

Spectrum Graph

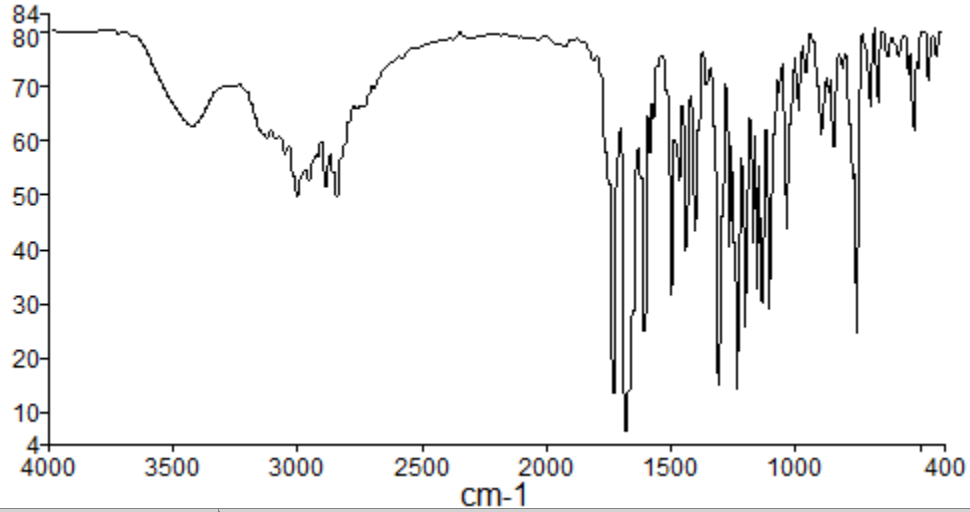

| 名称                | 说明 |
|-------------------|----|
| S20121127-061-S11 |    |

Search Result  
Peak Table Results

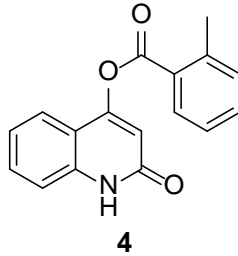

| 频谱名               |
|-------------------|
| S20121127-061-S11 |

| 峰值名 | X      | Y     |
|-----|--------|-------|
| 51  | 422.76 | 75.9  |
| 50  | 456.84 | 71.69 |
| 49  | 498.03 | 73.74 |
| 48  | 513.24 | 62.48 |
| 47  | 530.45 | 72.2  |
| 46  | 575.58 | 75.86 |
| 45  | 612.67 | 76.08 |
| 44  | 625.16 | 75.98 |
| 43  | 658.59 | 67.37 |
| 42  | 683.18 | 66.75 |

|    |         |       |
|----|---------|-------|
| 41 | 700.75  | 72.06 |
| 40 | 745.18  | 24.7  |
| 39 | 768.57  | 53.11 |
| 38 | 801.29  | 73.63 |
| 37 | 837.55  | 59.43 |
| 36 | 861.78  | 69.21 |
| 35 | 877.14  | 63.43 |
| 34 | 896.38  | 61.7  |
| 33 | 950.59  | 73.21 |
| 32 | 975.22  | 65.9  |
| 31 | 1023.2  | 43.76 |
| 30 | 1034.84 | 54.81 |
| 29 | 1058.98 | 69.4  |
| 28 | 1099.9  | 29.14 |
| 27 | 1126.71 | 30.42 |
| 26 | 1143.37 | 32.93 |
| 25 | 1157.47 | 38.46 |
| 24 | 1169.19 | 54.11 |
| 23 | 1199.88 | 25.81 |
| 22 | 1231.46 | 14.29 |
| 21 | 1261.36 | 40.59 |
| 20 | 1300.33 | 14.67 |
| 19 | 1351.51 | 70.86 |
| 18 | 1394.49 | 43.37 |
| 17 | 1437.88 | 39.93 |
| 16 | 1458.8  | 52.67 |
| 15 | 1476.9  | 58.73 |
| 14 | 1491.6  | 31.78 |
| 13 | 1502.69 | 57.6  |
| 12 | 1568.08 | 64.66 |
| 11 | 1579.87 | 58.06 |
| 10 | 1603.34 | 24.8  |
| 9  | 1674.99 | 6.14  |
| 8  | 1726.78 | 13.14 |
| 7  | 2852.29 | 49.78 |
| 6  | 2888.96 | 51.47 |
| 5  | 2962.64 | 53.06 |
| 4  | 3010.98 | 50.06 |
| 3  | 3061.14 | 57.78 |
| 2  | 3133.26 | 60.9  |
| 1  | 3429.52 | 62.94 |



S20120919-012

20120919

PROTON DMSO D:\nmr\_data ham

— 11.958

8.152  
8.132  
7.617  
7.597  
7.577  
7.513  
7.493  
7.419  
7.399  
7.233  
7.214  
7.195  
6.588  
5.759

3.329  
2.784  
2.765  
2.746  
2.727  
2.510  
2.505  
2.501  
1.262  
1.243  
1.224

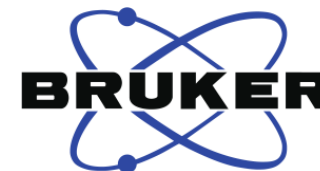

Current Data Parameters  
NAME SYPN-04  
EXPNO 10  
PROCNO 1

F2 - Acquisition Parameters  
Date\_ 20120919  
Time 10.55  
INSTRUM spect  
PROBHD 5 mm PABBO BB-  
PULPROG zg30  
TD 65536  
SOLVENT DMSO  
NS 16  
DS 2  
SWH 8223.685 Hz  
FIDRES 0.125483 Hz  
AQ 3.9846387 sec  
RG 203  
DW 60.800 usec  
DE 6.50 usec  
TE 298.0 K  
D1 1.0000000 sec

==== CHANNEL f1 =====  
NUC1 1H  
P1 14.50 usec  
PLW1 12.85299969 W  
SFO1 400.1324710 MHz

F2 - Processing parameters  
SI 65536  
SF 400.1300000 MHz  
WDW EM  
SSB 0  
LB 0.30 Hz  
GB 0  
PC 1.00

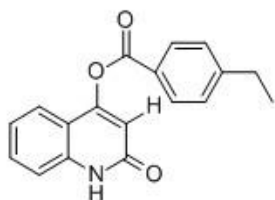

5

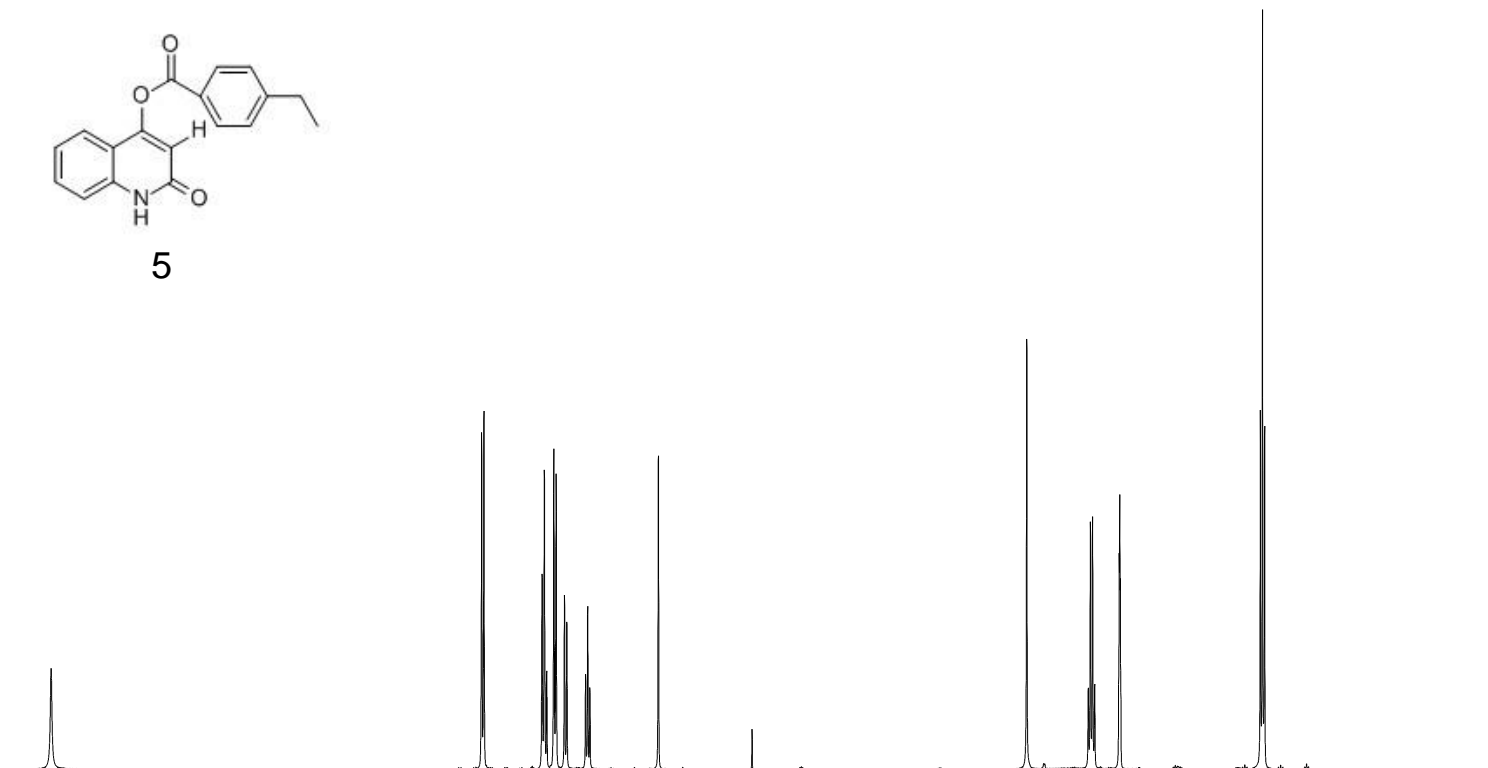

0.94

1.96  
1.97  
1.99  
1.02  
1.00  
0.90

2.00

3.16

S20121106-066

20121107

C13CPD DMSO D:\nmr\_data ham

163.71  
162.70  
156.58  
151.78  
139.43  
132.00  
130.79  
129.08  
125.88  
122.66  
116.07  
115.32  
113.03

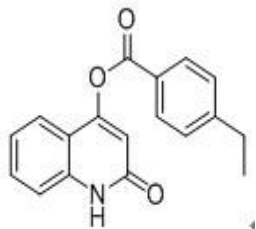

5

40.61  
40.41  
40.20  
39.99  
39.78  
39.57  
39.36  
28.78  
15.65

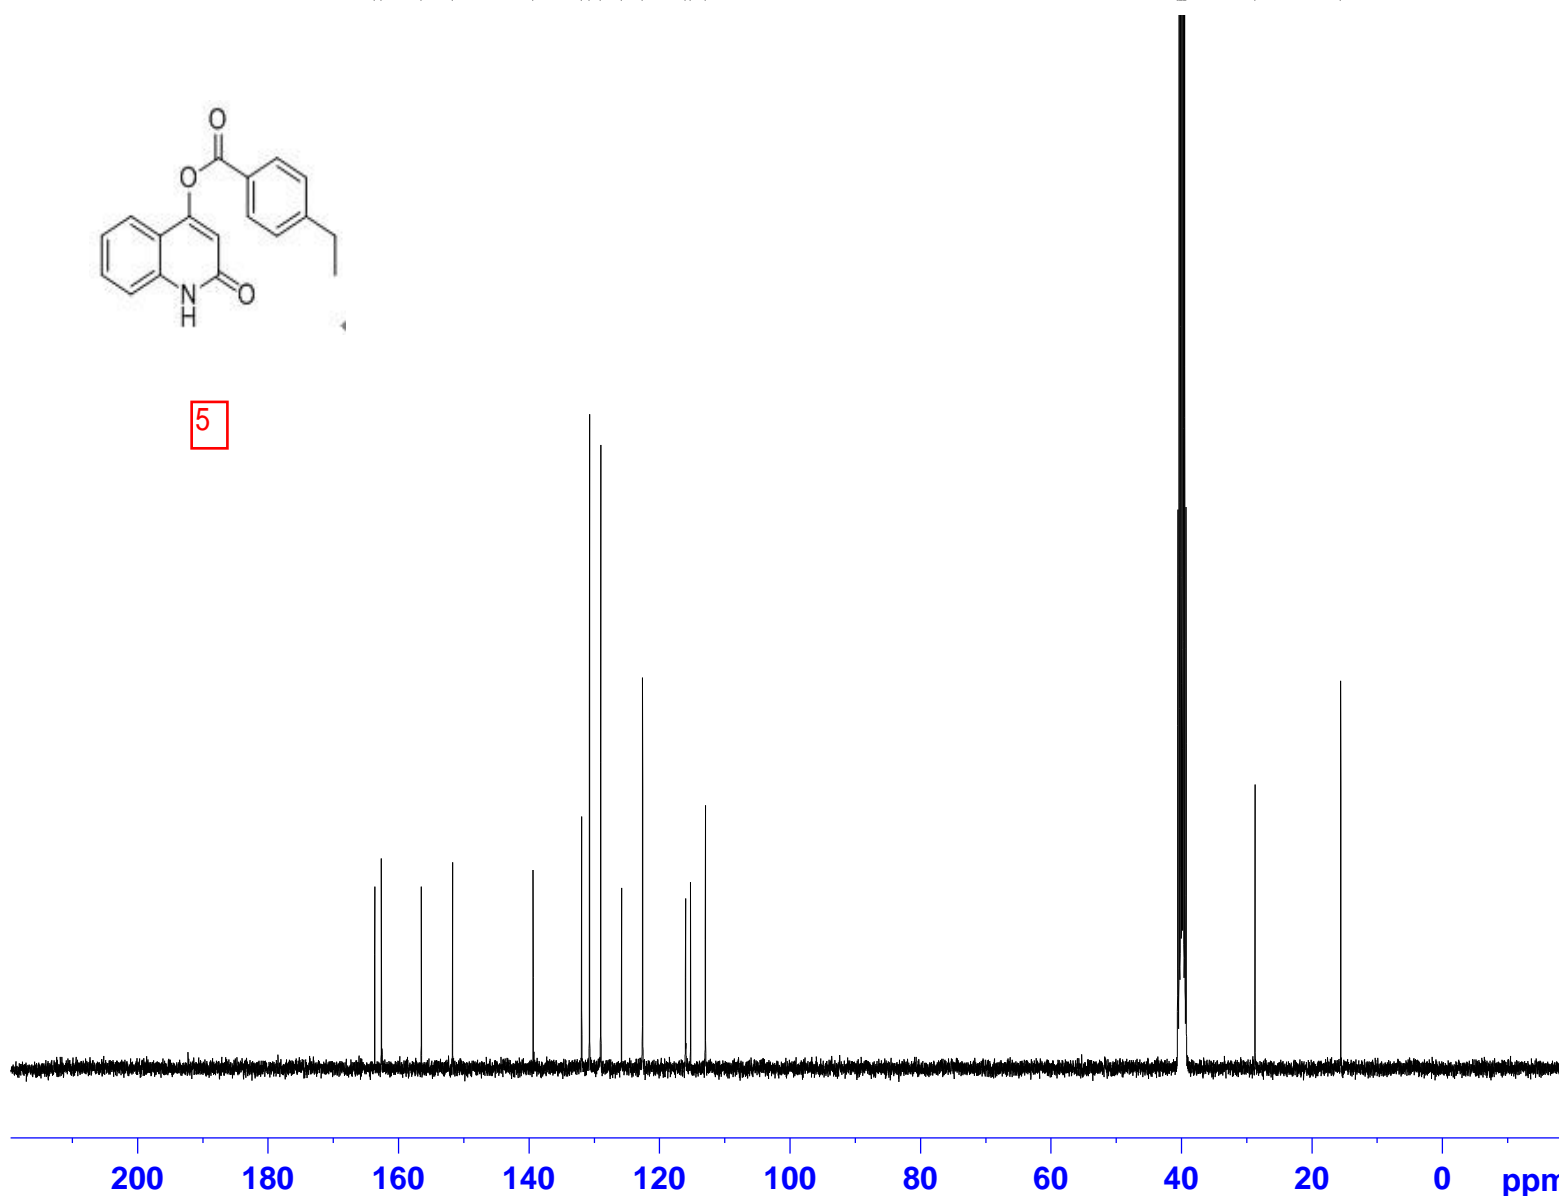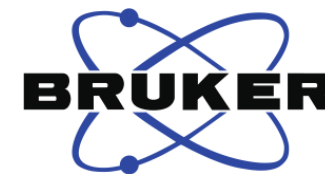

Current Data Parameters  
NAME S3  
EXPNO 10  
PROCNO 1

F2 - Acquisition Parameters  
Date\_ 20121107  
Time 20.07  
INSTRUM spect  
PROBHD 5 mm PABBO BB-  
PULPROG zgpg30  
TD 65536  
SOLVENT DMSO  
NS 1024  
DS 4  
SWH 24038.461 Hz  
FIDRES 0.366798 Hz  
AQ 1.3631988 sec  
RG 203  
DW 20.800 usec  
DE 6.50 usec  
TE 298.0 K  
D1 2.0000000 sec  
D11 0.0300000 sec

==== CHANNEL f1 =====  
NUC1 13C  
P1 9.65 usec  
PLW1 49.65900040 W  
SFO1 100.6228293 MHz

==== CHANNEL f2 =====  
CPDPRG2 waltz16  
NUC2 1H  
PCPD2 90.00 usec  
PLW2 12.85299969 W  
PLW12 0.34196001 W  
PLW13 0.27699000 W  
SFO2 400.1316005 MHz

F2 - Processing parameters  
SI 32768  
SF 100.6127690 MHz  
WDW EM  
SSB 0  
LB 1.00 Hz  
GB 0  
PC 1.40

**Spectrum Graph**

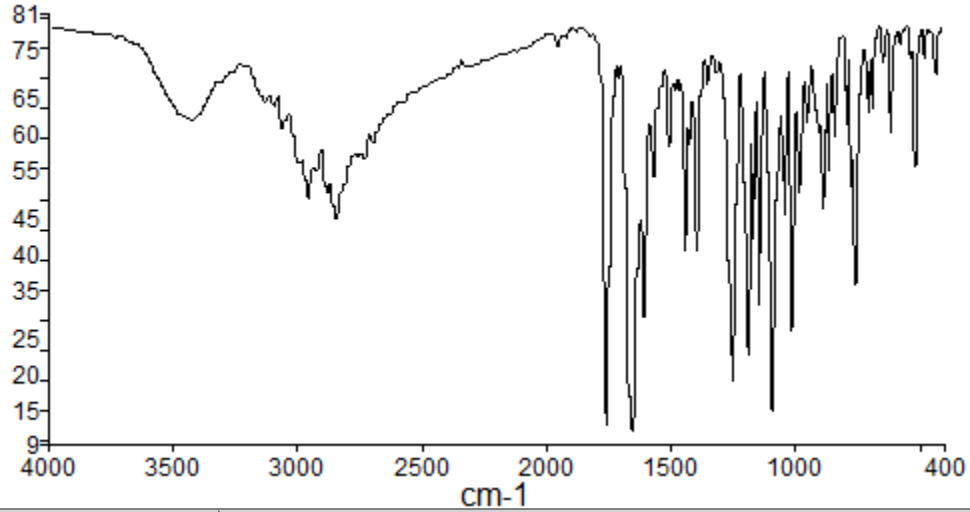

| 名称               | 说明 |
|------------------|----|
| S20121127-054-S3 |    |

**Search Result  
Peak Table Results**

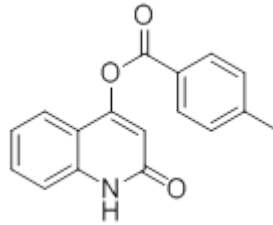

5

| 频谱名              |
|------------------|
| S20121127-016-S3 |

| 峰值名 | X       | Y     |
|-----|---------|-------|
| 47  | 425.27  | 71.07 |
| 46  | 469.48  | 73.77 |
| 45  | 508.52  | 55.95 |
| 44  | 566.95  | 76    |
| 43  | 602.72  | 69.65 |
| 42  | 611.83  | 61.63 |
| 41  | 639.84  | 73.2  |
| 40  | 678.97  | 65.47 |
| 39  | 694.04  | 64.92 |
| 38  | 749.86  | 36.05 |
| 37  | 764.65  | 51.06 |
| 36  | 784.58  | 62.77 |
| 35  | 834.83  | 60.97 |
| 34  | 860.69  | 55.04 |
| 33  | 880.41  | 48.43 |
| 32  | 944.82  | 63.1  |
| 31  | 976.87  | 51.34 |
| 30  | 1007.77 | 28.3  |
| 29  | 1034.99 | 47.96 |

|    |         |       |
|----|---------|-------|
| 28 | 1086.64 | 14.76 |
| 27 | 1125.98 | 63.63 |
| 26 | 1140.42 | 32.45 |
| 25 | 1156.46 | 43.39 |
| 24 | 1182.09 | 24.11 |
| 23 | 1194.61 | 32.42 |
| 22 | 1243.2  | 19.95 |
| 21 | 1312.74 | 71.48 |
| 20 | 1351.71 | 69.53 |
| 19 | 1389.58 | 41.43 |
| 18 | 1417.93 | 59.4  |
| 17 | 1435.59 | 41.53 |
| 16 | 1459.74 | 68.44 |
| 15 | 1499.65 | 58.82 |
| 14 | 1510.08 | 61.03 |
| 13 | 1565.74 | 53.66 |
| 12 | 1609.45 | 30.72 |
| 11 | 1655.12 | 11.17 |
| 10 | 1714.4  | 70.27 |
| 9  | 1756.12 | 12.33 |
| 8  | 1952.89 | 75.85 |
| 7  | 2698.17 | 59.52 |
| 6  | 2853.84 | 46.99 |
| 5  | 2887.83 | 51.08 |
| 4  | 2967.82 | 50.23 |
| 3  | 3072.71 | 62.13 |
| 2  | 3097.88 | 65.71 |
| 1  | 3435.43 | 63.45 |

S20120919-017

20120919

PROTON NMR DMSO D:\nmr\_data ham

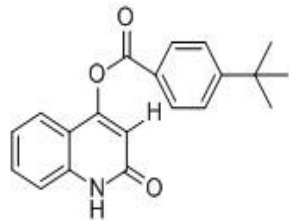

6

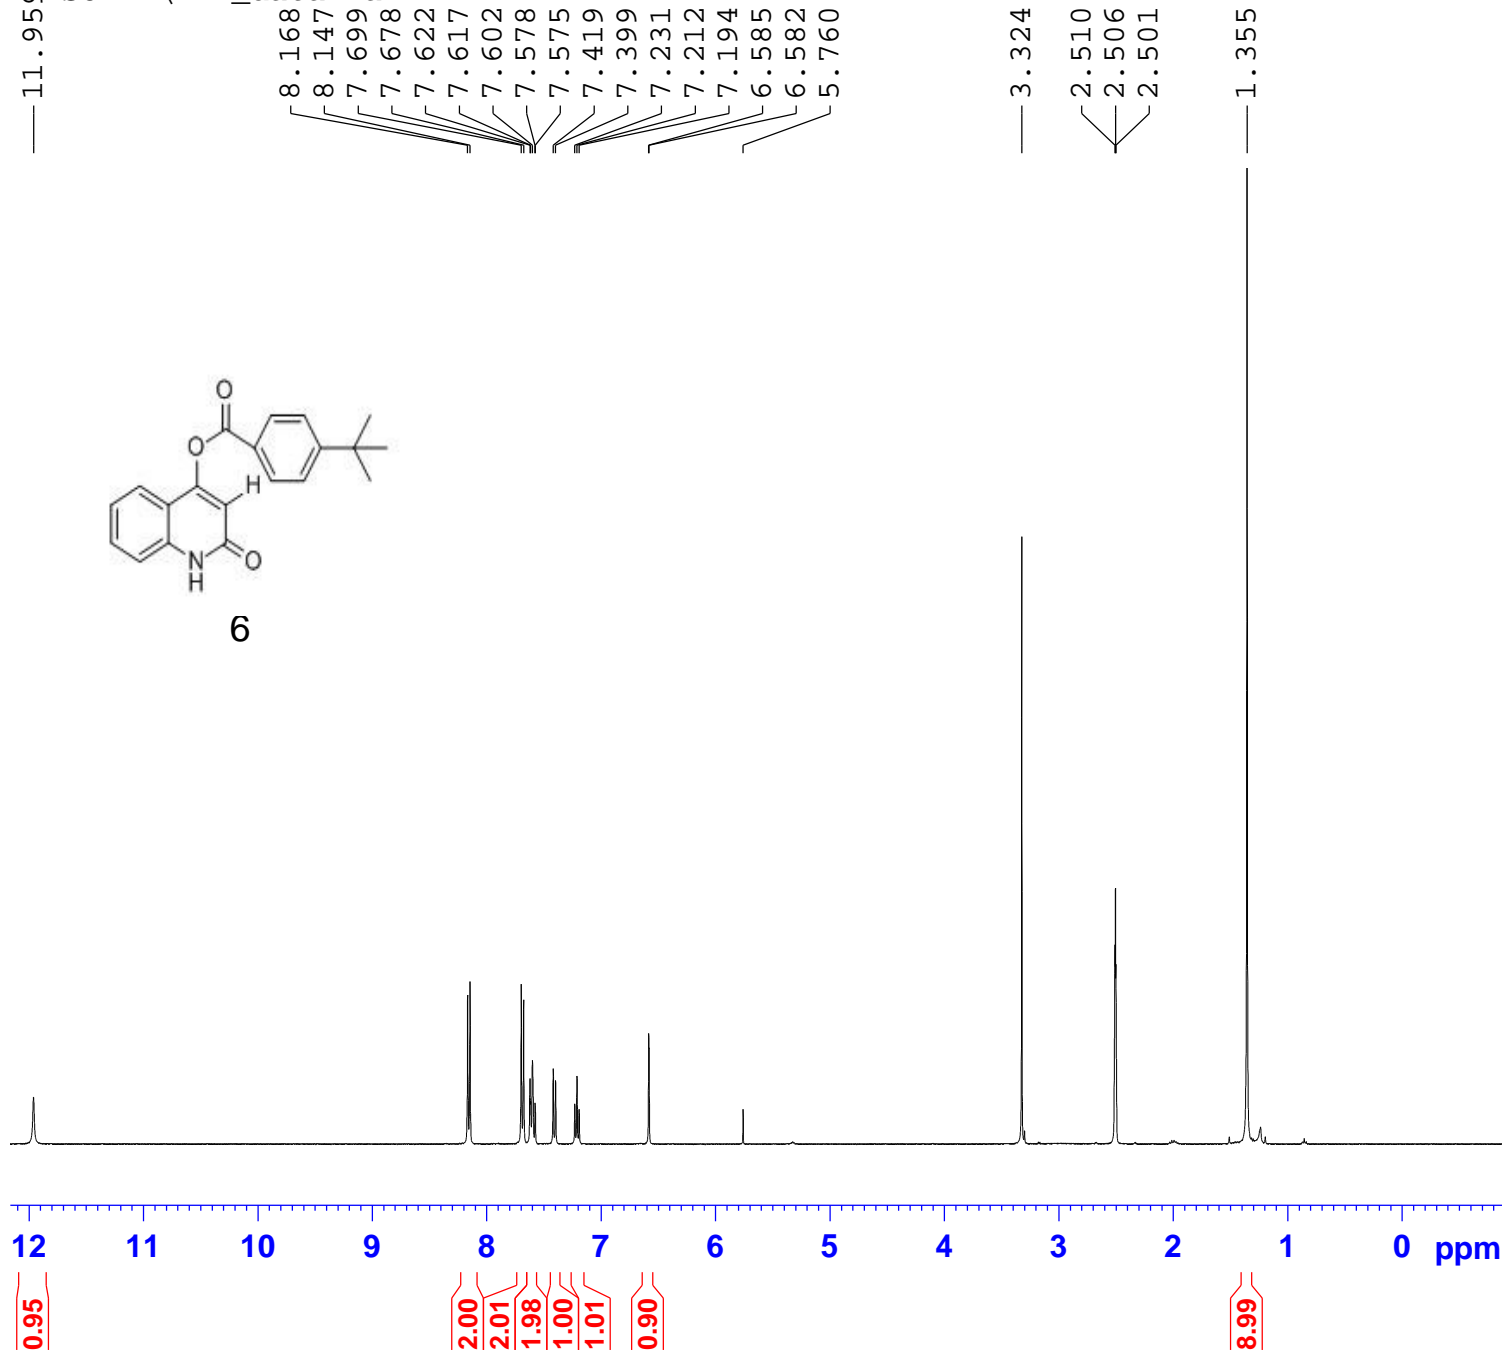

Current Data Parameters  
NAME SYPN-09  
EXPNO 10  
PROCNO 1

F2 - Acquisition Parameters  
Date\_ 20120919  
Time 11.14  
INSTRUM spect  
PROBHD 5 mm PABBO BB-  
PULPROG zg30  
TD 65536  
SOLVENT DMSO  
NS 16  
DS 2  
SWH 8223.685 Hz  
FIDRES 0.125483 Hz  
AQ 3.9846387 sec  
RG 203  
DW 60.800 usec  
DE 6.50 usec  
TE 298.0 K  
D1 1.00000000 sec

==== CHANNEL f1 =====  
NUC1 1H  
P1 14.50 usec  
PLW1 12.85299969 W  
SFO1 400.1324710 MHz

F2 - Processing parameters  
SI 65536  
SF 400.1300000 MHz  
WDW EM  
SSB 0  
LB 0.30 Hz  
GB 0  
PC 1.00

S20121106-070

20121107

C13CPD DMSO D:\nmr\_data ham

163.64  
162.69  
162.58  
158.38  
156.60  
139.44  
132.01  
130.58  
126.53  
125.68  
122.67  
116.07  
115.33  
113.03

55.37  
40.62  
40.41  
40.20  
39.99  
39.78  
39.57  
39.37  
35.53  
31.23

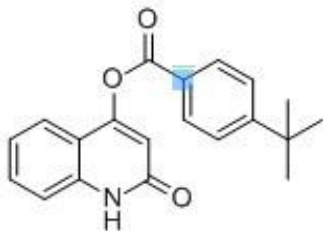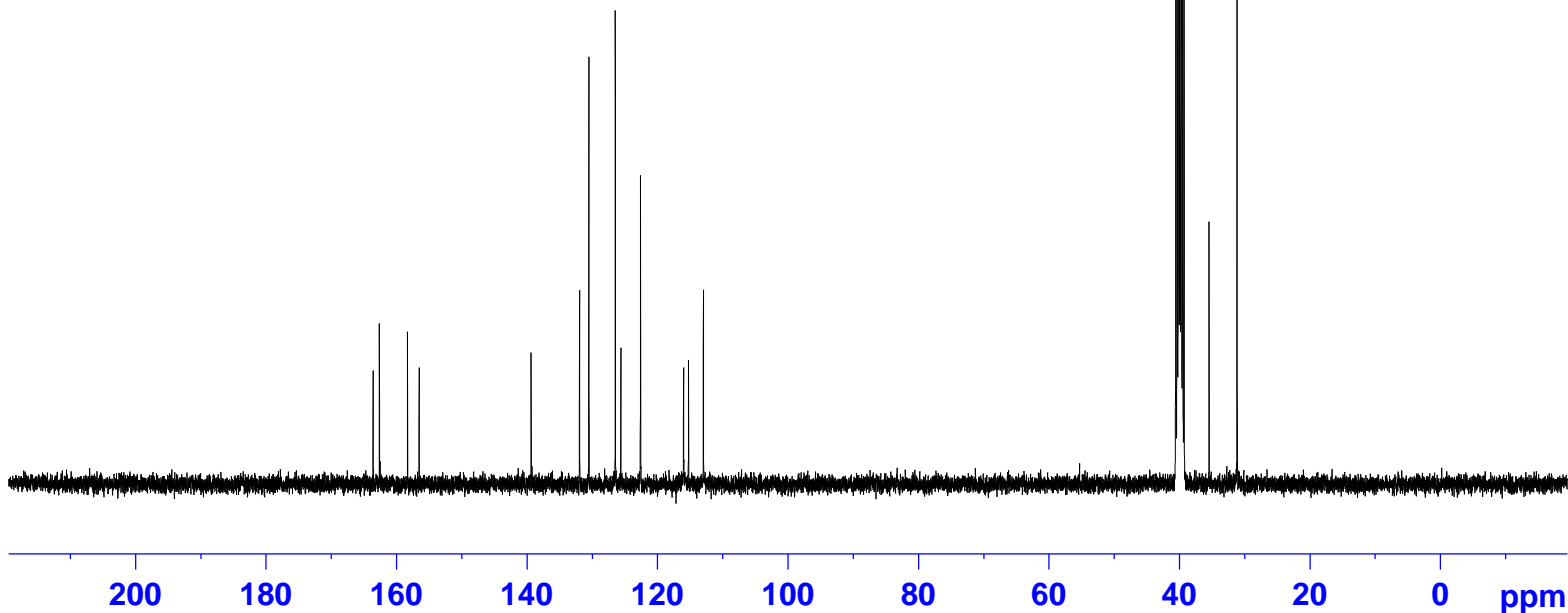

Current Data Parameters  
NAME S7  
EXPNO 10  
PROCNO 1

F2 - Acquisition Parameters  
Date\_ 20121108  
Time 0.11  
INSTRUM spect  
PROBHD 5 mm PABBO BB-  
PULPROG zgpg30  
TD 65536  
SOLVENT DMSO  
NS 1024  
DS 4  
SWH 24038.461 Hz  
FIDRES 0.366798 Hz  
AQ 1.3631988 sec  
RG 203  
DW 20.800 usec  
DE 6.50 usec  
TE 298.0 K  
D1 2.0000000 sec  
D11 0.0300000 sec

==== CHANNEL f1 =====  
NUC1 13C  
P1 9.65 usec  
PLW1 49.65900040 W  
SFO1 100.6228293 MHz

==== CHANNEL f2 =====  
CPDPRG2 waltz16  
NUC2 1H  
PCPD2 90.00 usec  
PLW2 12.85299969 W  
PLW12 0.34196001 W  
PLW13 0.27699000 W  
SFO2 400.1316005 MHz

F2 - Processing parameters  
SI 32768  
SF 100.6127690 MHz  
WDW EM  
SSB 0  
LB 1.00 Hz  
GB 0  
PC 1.40

Spectrum Graph

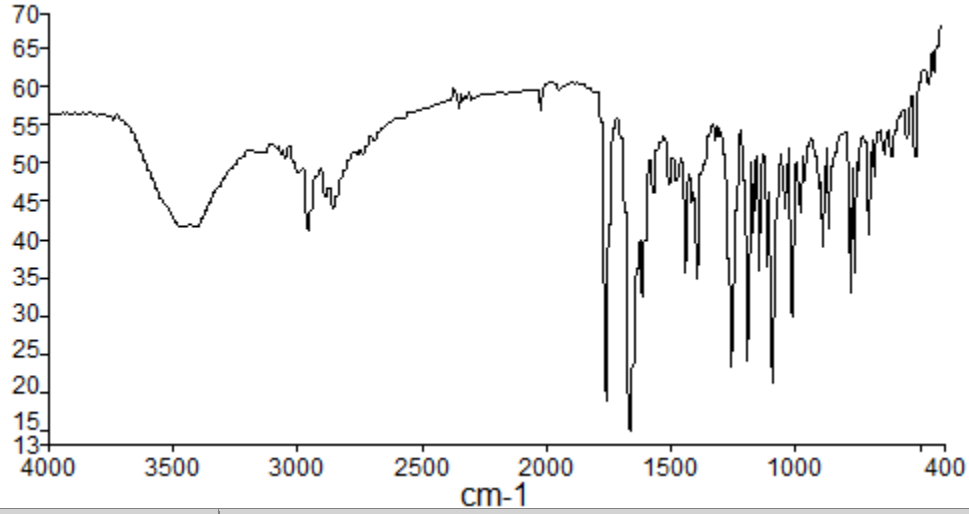

| 名称               | 说明 |
|------------------|----|
| S20121127-058-S7 |    |

Search Result  
Peak Table Results

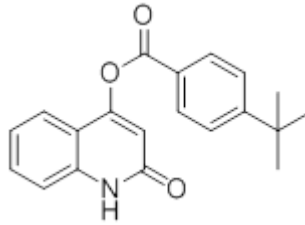

6

| 频谱名              |
|------------------|
| S20121127-020-S7 |

| 峰值名 | X      | Y     |
|-----|--------|-------|
| 43  | 428.47 | 62.1  |
| 42  | 460.99 | 60.55 |
| 41  | 508    | 50.87 |
| 40  | 528.44 | 55.39 |
| 39  | 542.32 | 53.23 |
| 38  | 602.78 | 50.81 |
| 37  | 633.91 | 51.51 |
| 36  | 675.7  | 48.23 |
| 35  | 696.91 | 40.65 |

|    |         |       |
|----|---------|-------|
| 34 | 738.23  | 49.21 |
| 33 | 751.39  | 35.71 |
| 32 | 766.46  | 33.09 |
| 31 | 834.03  | 49.92 |
| 30 | 852.75  | 41.57 |
| 29 | 884.45  | 39.15 |
| 28 | 948.71  | 48.11 |
| 27 | 971.53  | 43.77 |
| 26 | 1005.91 | 29.88 |
| 25 | 1024.54 | 45.83 |
| 24 | 1035.8  | 44.46 |
| 23 | 1084.24 | 21.39 |
| 22 | 1110.11 | 36.53 |
| 21 | 1141.74 | 36.05 |
| 20 | 1156.5  | 40.93 |
| 19 | 1187.07 | 24.17 |
| 18 | 1254.43 | 23.49 |
| 17 | 1315.64 | 53.25 |
| 16 | 1388.53 | 34.86 |
| 15 | 1408.48 | 44.9  |
| 14 | 1434.67 | 35.68 |
| 13 | 1475.9  | 47.66 |
| 12 | 1499.88 | 47.33 |
| 11 | 1566.26 | 46.19 |
| 10 | 1607.69 | 32.69 |
| 9  | 1661.39 | 14.76 |
| 8  | 1757.67 | 18.78 |
| 7  | 2025.41 | 57.07 |
| 6  | 2351.95 | 57.43 |
| 5  | 2860.25 | 44.23 |
| 4  | 2890.97 | 45.7  |
| 3  | 2962    | 41.33 |
| 2  | 3060.9  | 50.98 |
| 1  | 3466.88 | 41.54 |



S20120919-010

20120919

PROTON DMSO D:\nmr\_data ham



Current Data Parameters  
NAME SYPN-02  
EXPNO 10  
PROCNO 1

F2 - Acquisition Parameters  
Date\_ 20120919  
Time 10.47  
INSTRUM spect  
PROBHD 5 mm PABBO BB-  
PULPROG zg30  
TD 65536  
SOLVENT DMSO  
NS 16  
DS 2  
SWH 8223.685 Hz  
FIDRES 0.125483 Hz  
AQ 3.9846387 sec  
RG 203  
DW 60.800 usec  
DE 6.50 usec  
TE 298.0 K  
D1 1.0000000 sec

==== CHANNEL f1 =====  
NUC1 1H  
P1 14.50 usec  
PLW1 12.85299969 W  
SFO1 400.1324710 MHz

F2 - Processing parameters  
SI 65536  
SF 400.1300000 MHz  
WDW EM  
SSB 0  
LB 0.30 Hz  
GB 0  
PC 1.00

11.975  
8.247  
8.227  
7.734  
7.713  
7.649  
7.629  
7.622  
7.601  
7.583  
7.422  
7.401  
7.236  
7.217  
7.199  
6.621  
5.760  
4.921  
3.324  
2.509  
2.505  
2.501

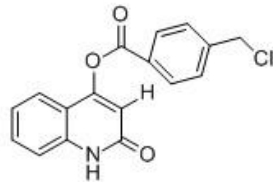

7

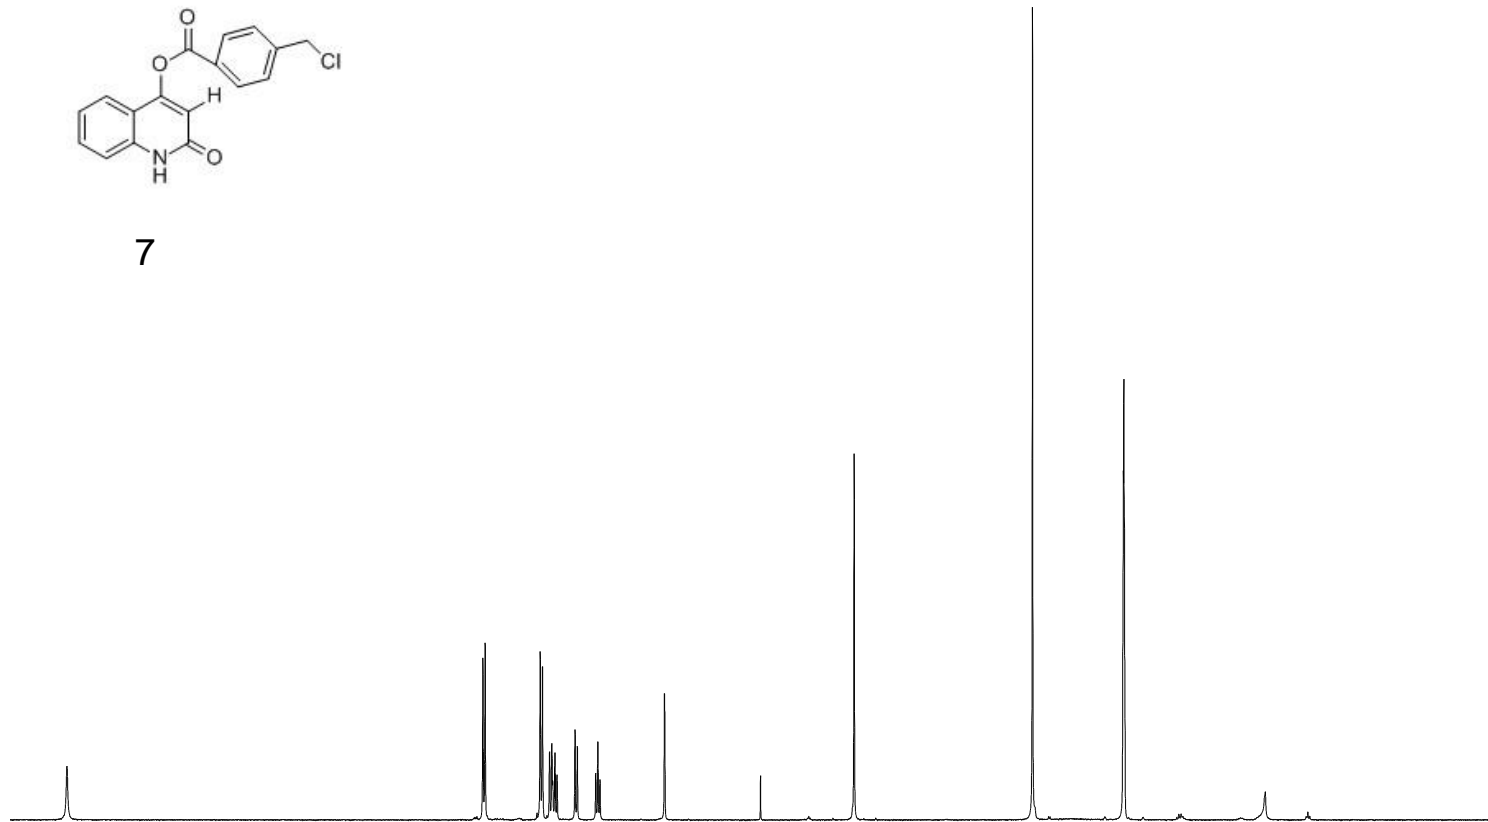

12 11 10 9 8 7 6 5 4 3 2 1 0 ppm

0.93

1.97

1.99

1.98

1.00

1.02

0.91

2.01

S20121106-078

20121108

C13CPD DMSO D:\nmr\_data ham

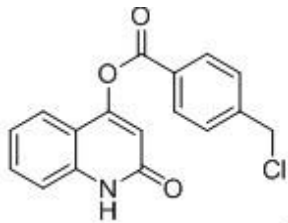

163.39  
162.67  
156.48  
144.71  
139.44  
132.05  
131.03  
129.92  
128.22  
122.69  
116.07  
115.22  
113.08

45.57  
40.62  
40.41  
40.20  
39.99  
39.78  
39.57  
39.36

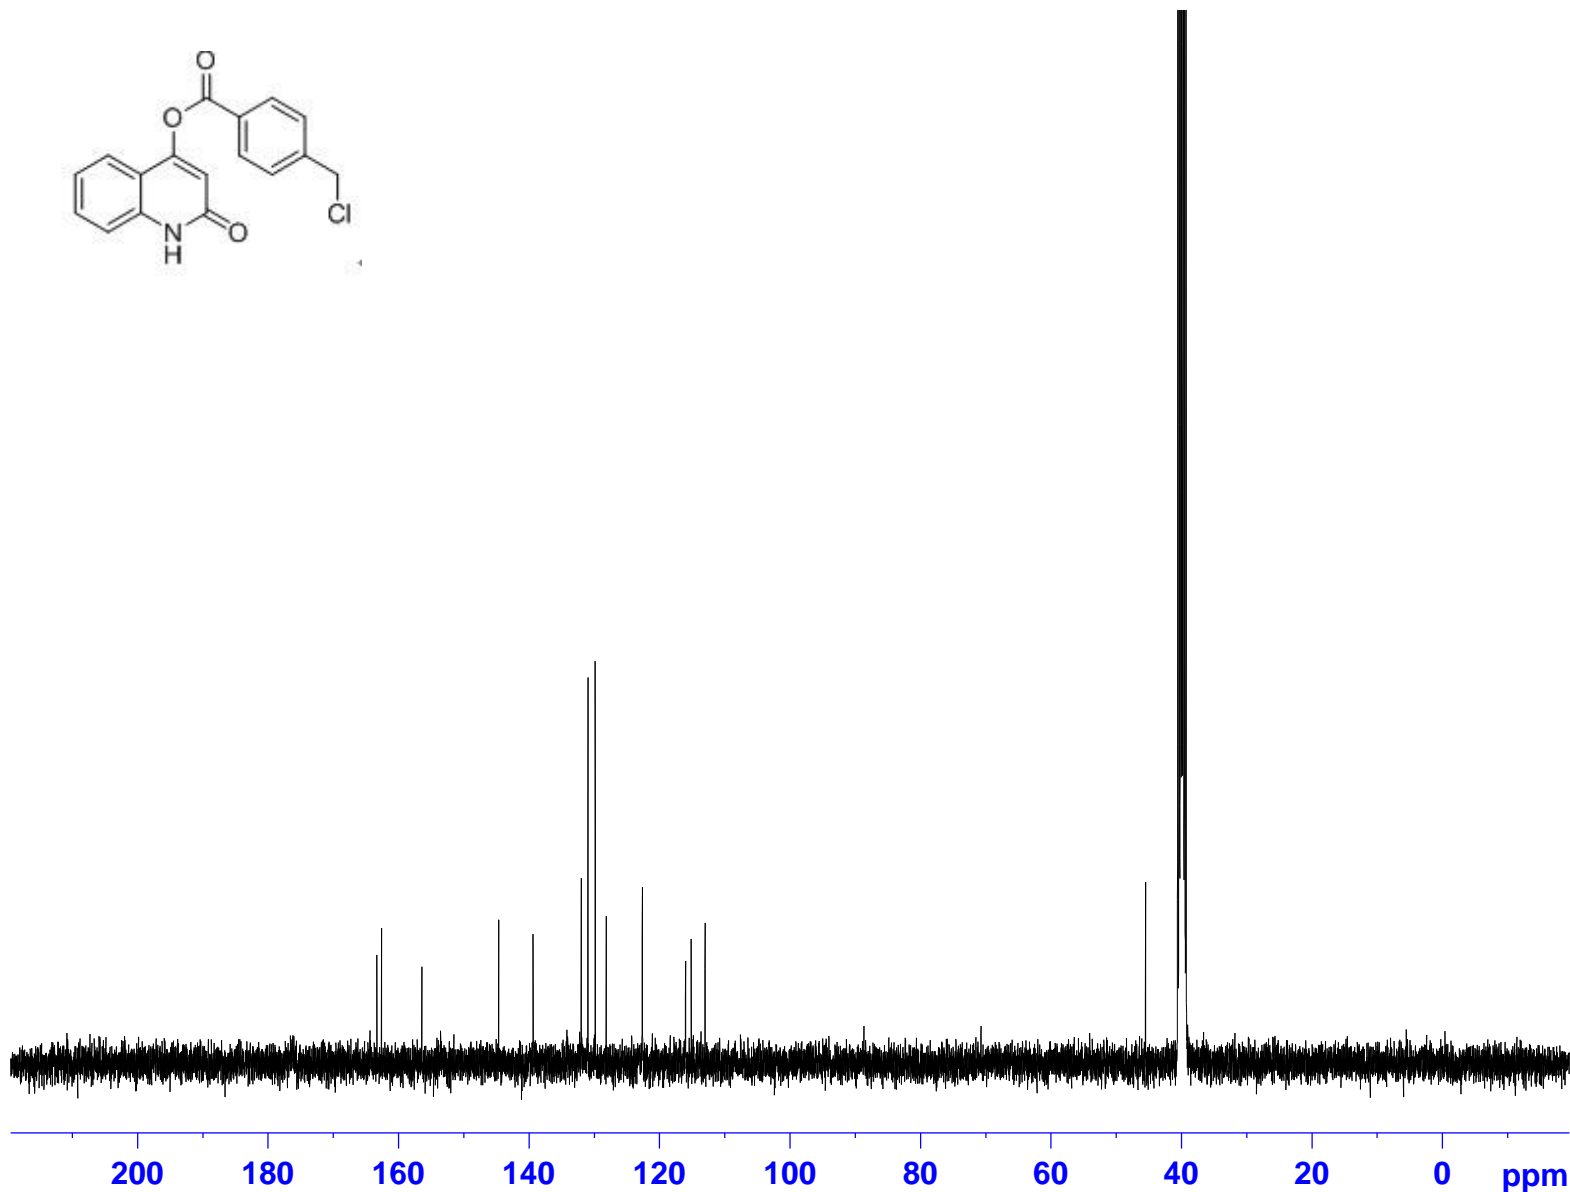

Current Data Parameters  
NAME S-14  
EXPNO 10  
PROCNO 1

F2 - Acquisition Parameters  
Date\_ 20121108  
Time 22.02  
INSTRUM spect  
PROBHD 5 mm PABBO BB-  
PULPROG zgpg30  
TD 65536  
SOLVENT DMSO  
NS 1024  
DS 4  
SWH 24038.461 Hz  
FIDRES 0.366798 Hz  
AQ 1.3631988 sec  
RG 203  
DW 20.800 usec  
DE 6.50 usec  
TE 298.0 K  
D1 2.0000000 sec  
D11 0.0300000 sec

==== CHANNEL f1 =====  
NUC1 13C  
P1 9.65 usec  
PLW1 49.65900040 W  
SFO1 100.6228293 MHz

==== CHANNEL f2 =====  
CPDPRG2 waltz16  
NUC2 1H  
PCPD2 90.00 usec  
PLW2 12.85299969 W  
PLW12 0.34196001 W  
PLW13 0.27699000 W  
SFO2 400.1316005 MHz

F2 - Processing parameters  
SI 32768  
SF 100.6127690 MHz  
WDW EM  
SSB 0  
LB 1.00 Hz  
GB 0  
PC 1.40

### Spectrum Graph

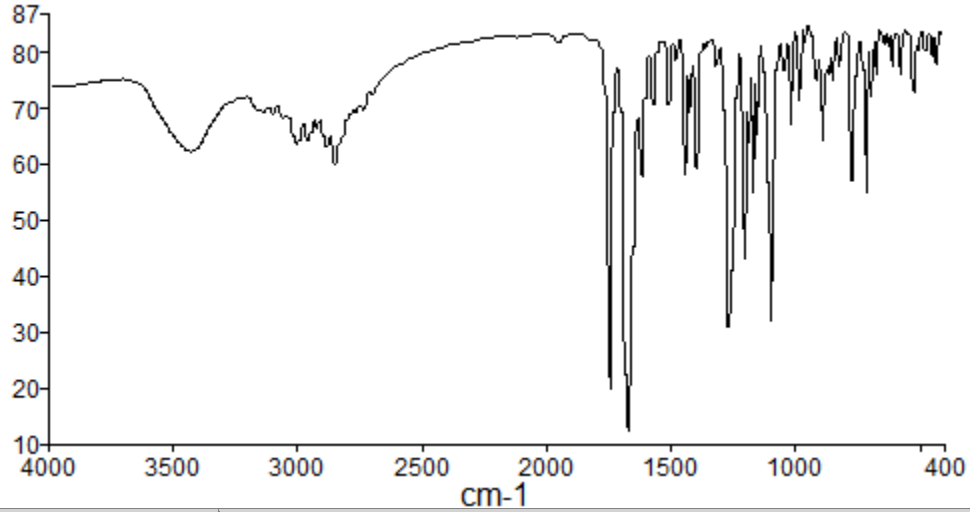

| 名称                | 说明 |
|-------------------|----|
| S20121127-064-S14 |    |

### Search Result Peak Table Results

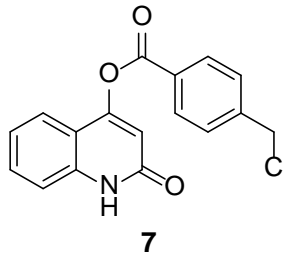

| 频谱名               |
|-------------------|
| S20121127-064-S14 |

| 峰值名 | X      | Y     |
|-----|--------|-------|
| 39  | 429.99 | 78.09 |
| 38  | 444.92 | 79.79 |
| 37  | 468.77 | 80.63 |
| 36  | 514.98 | 73.25 |
| 35  | 570.2  | 76.48 |
| 34  | 599.29 | 77.84 |
| 33  | 669.16 | 76.31 |
| 32  | 688.12 | 72.37 |
| 31  | 710.73 | 54.84 |
| 30  | 756.04 | 60.18 |

|    |         |       |
|----|---------|-------|
| 29 | 761.96  | 57.11 |
| 28 | 816.76  | 77.98 |
| 27 | 834.02  | 75.43 |
| 26 | 884.87  | 64.57 |
| 25 | 906.43  | 75.32 |
| 24 | 978.28  | 71.89 |
| 23 | 1014.65 | 67.51 |
| 22 | 1039.22 | 77.32 |
| 21 | 1096.76 | 32.05 |
| 20 | 1144.09 | 65.74 |
| 19 | 1161.56 | 54.99 |
| 18 | 1178.33 | 64.17 |
| 17 | 1196.9  | 43.28 |
| 16 | 1263.82 | 31.15 |
| 15 | 1317.01 | 77.87 |
| 14 | 1392.62 | 59.71 |
| 13 | 1415.86 | 69.54 |
| 12 | 1438.02 | 58.13 |
| 11 | 1478.15 | 78.81 |
| 10 | 1504.63 | 71.07 |
| 9  | 1567.25 | 71    |
| 8  | 1611.52 | 57.97 |
| 7  | 1674.74 | 11.89 |
| 6  | 1740.67 | 19.58 |
| 5  | 2858.02 | 60.24 |
| 4  | 2892.13 | 63.18 |
| 3  | 2965.19 | 64.37 |
| 2  | 3014.39 | 63.86 |
| 1  | 3435.97 | 62.58 |

S20120919-018

20120919

PROTON NMR DMSO D:\nmr\_data ham

11.999  
8.979  
8.283  
8.263  
8.186  
8.182  
8.178  
8.114  
8.094  
7.763  
7.746  
7.714  
7.694  
7.612  
7.440  
7.420  
7.231  
6.666  
3.327  
2.510  
2.505  
2.501

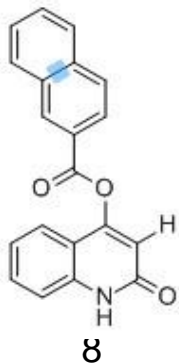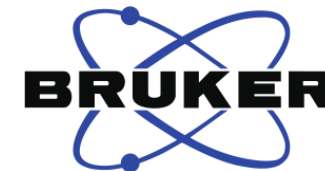

Current Data Parameters  
NAME SYPN-10  
EXPNO 10  
PROCNO 1

F2 - Acquisition Parameters  
Date\_ 20120919  
Time 11.18  
INSTRUM spect  
PROBHD 5 mm PABBO BB-  
PULPROG zg30  
TD 65536  
SOLVENT DMSO  
NS 16  
DS 2  
SWH 8223.685 Hz  
FIDRES 0.125483 Hz  
AQ 3.9846387 sec  
RG 203  
DW 60.800 usec  
DE 6.50 usec  
TE 298.0 K  
D1 1.0000000 sec

==== CHANNEL f1 =====  
NUC1 1H  
P1 14.50 usec  
PLW1 12.85299969 W  
SFO1 400.1324710 MHz

F2 - Processing parameters  
SI 65536  
SF 400.1300000 MHz  
WDW EM  
SSB 0  
LB 0.30 Hz  
GB 0  
PC 1.00

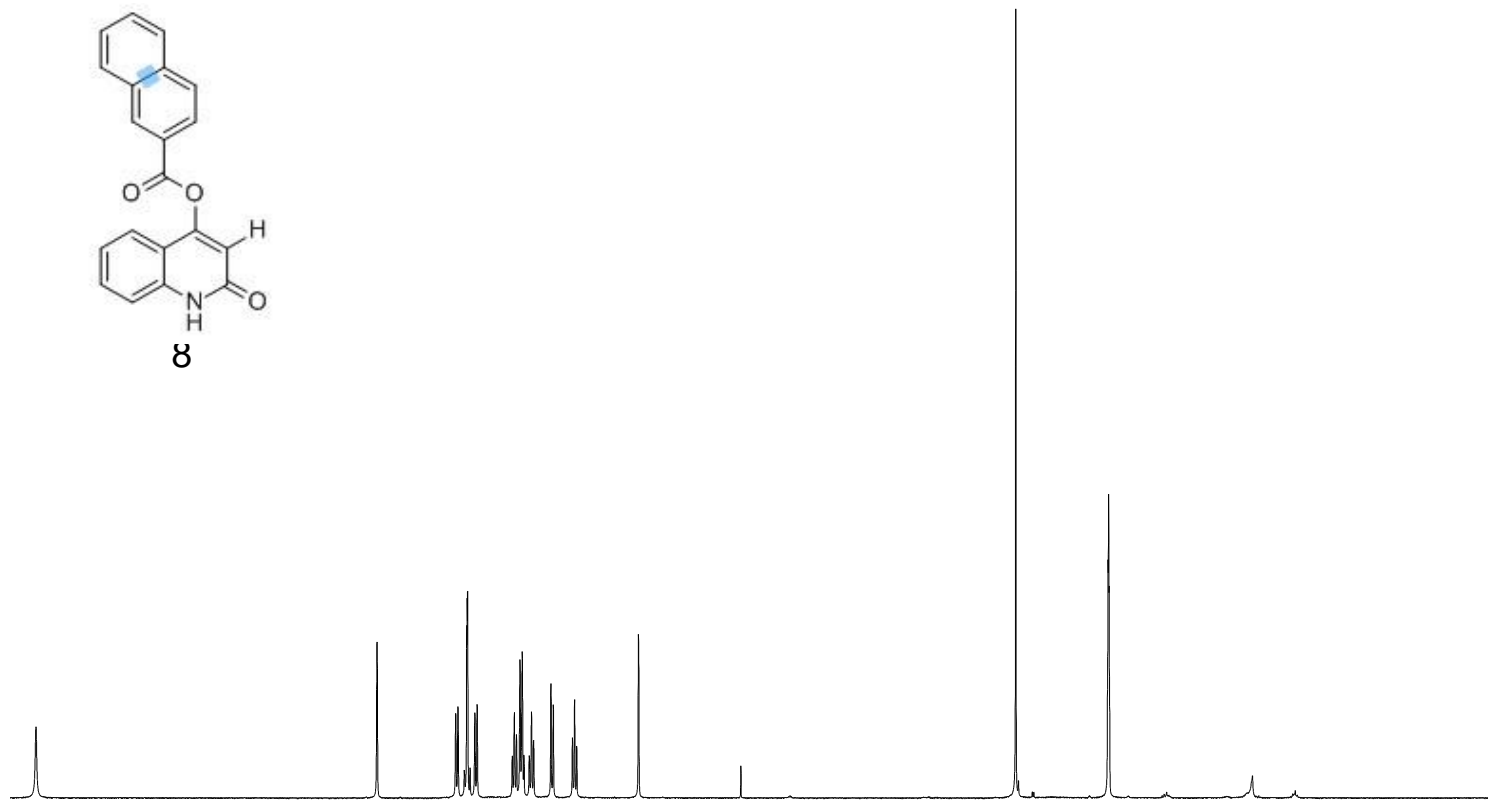

12 11 10 9 8 7 6 5 4 3 2 1 0 ppm

0.91  
0.94  
0.97  
1.92  
0.99  
1.00  
1.94  
0.99  
0.96  
0.99

S20121106-064

20121107

C13CPD DMSO D:\nmr\_data ham

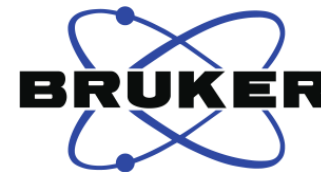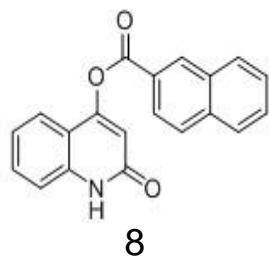

163.96  
162.72  
156.68  
139.48  
136.07  
132.63  
132.60  
132.06  
130.17  
129.81  
129.32  
128.29  
127.77  
125.65  
125.55  
122.80  
122.70  
116.09  
115.32  
113.18

40.62  
40.41  
40.20  
39.99  
39.78  
39.58  
39.37

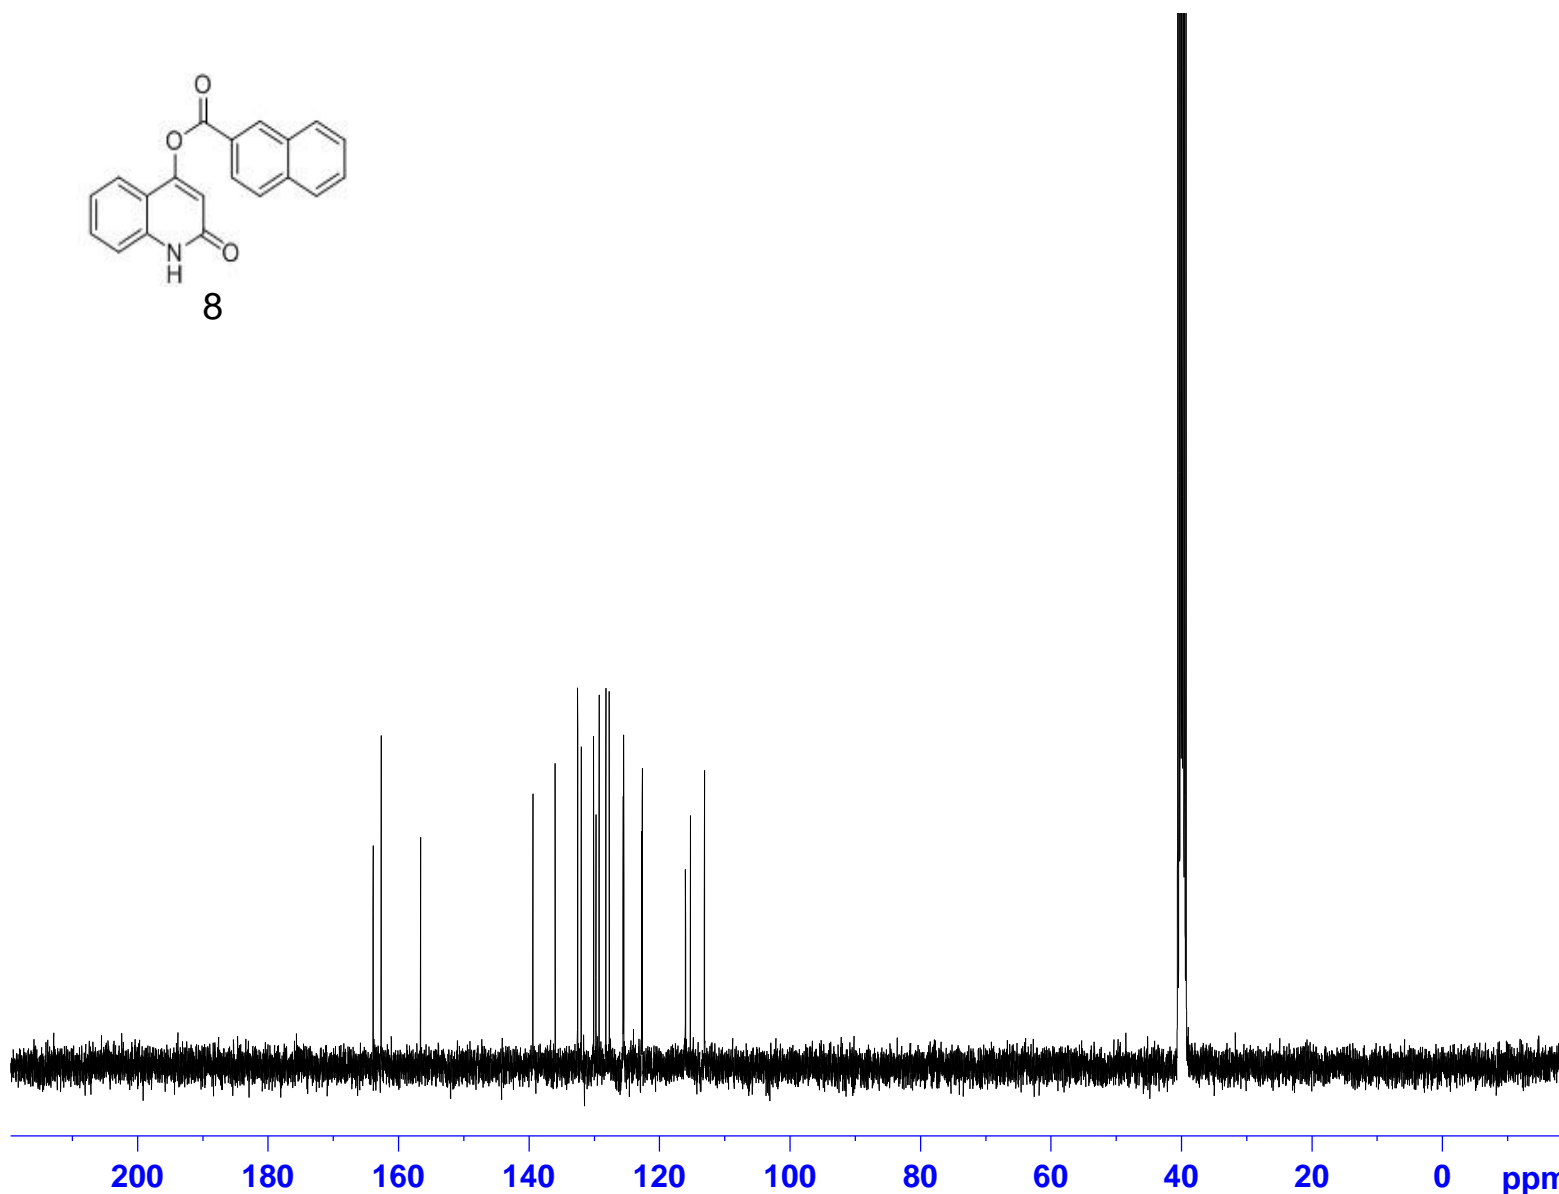

Current Data Parameters  
NAME S1  
EXPNO 10  
PROCNO 1

F2 - Acquisition Parameters  
Date\_ 20121107  
Time 18.04  
INSTRUM spect  
PROBHD 5 mm PABBO BB-  
PULPROG zgpg30  
TD 65536  
SOLVENT DMSO  
NS 1024  
DS 4  
SWH 24038.461 Hz  
FIDRES 0.366798 Hz  
AQ 1.3631988 sec  
RG 203  
DW 20.800 usec  
DE 6.50 usec  
TE 298.0 K  
D1 2.0000000 sec  
D11 0.0300000 sec

==== CHANNEL f1 =====  
NUC1 13C  
P1 9.65 usec  
PLW1 49.65900040 W  
SFO1 100.6228293 MHz

==== CHANNEL f2 =====  
CPDPRG2 waltz16  
NUC2 1H  
PCPD2 90.00 usec  
PLW2 12.85299969 W  
PLW12 0.34196001 W  
PLW13 0.27699000 W  
SFO2 400.1316005 MHz

F2 - Processing parameters  
SI 32768  
SF 100.6127690 MHz  
WDW EM  
SSB 0  
LB 1.00 Hz  
GB 0  
PC 1.40

**Spectrum Graph**

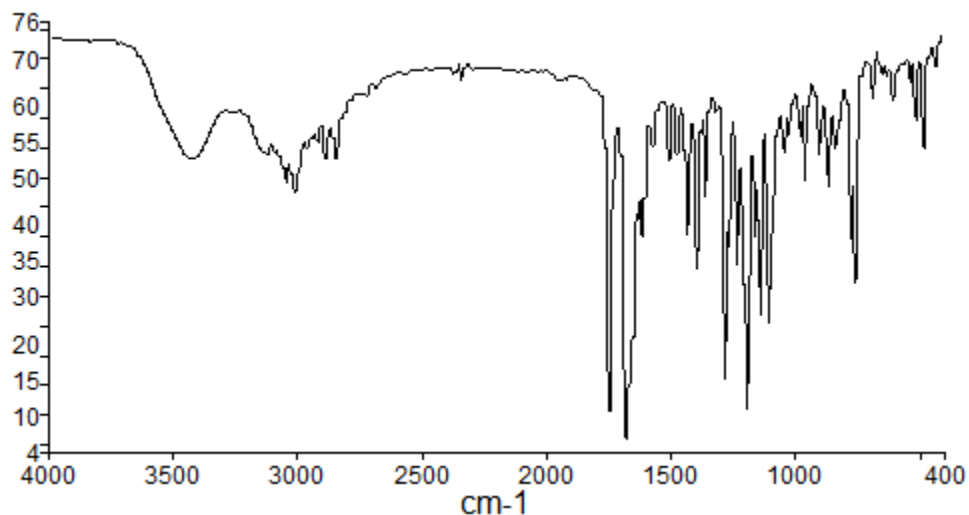

| 名称               | 说明 |
|------------------|----|
| S20121127-052-S1 |    |

**Search Result  
Peak Table Results**

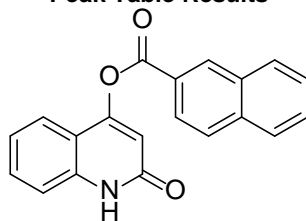

8

| 频谱名              |
|------------------|
| S20121127-014-S1 |

| 峰值名 | X      | Y     |
|-----|--------|-------|
| 48  | 420.8  | 69.06 |
| 47  | 473.76 | 54.92 |
| 46  | 505.93 | 60.02 |
| 45  | 529.66 | 66.5  |
| 44  | 594.36 | 64.18 |
| 43  | 605.64 | 63.36 |
| 42  | 625.14 | 67.27 |
| 41  | 644.49 | 67.7  |
| 40  | 680.72 | 63.74 |
| 39  | 750.08 | 32.44 |
| 38  | 757.91 | 42.24 |
| 37  | 769.85 | 39.66 |
| 36  | 818.62 | 56.11 |
| 35  | 831.97 | 55.24 |

|          |         |       |
|----------|---------|-------|
| 34       | 858.85  | 48.88 |
| 33       | 889.97  | 57.26 |
| 32       | 902.02  | 54.24 |
| 31       | 949.81  | 50.01 |
| 30       | 969.18  | 57.38 |
| 29       | 1013.87 | 57.67 |
| 28       | 1029.78 | 54.55 |
| 27       | 1037.92 | 55.08 |
| 26       | 1097.08 | 25.68 |
| 25       | 1131.1  | 26.91 |
| 24       | 1141.35 | 34.51 |
| 23       | 1158.88 | 40.07 |
| 酯C-O伸缩22 | 1190.89 | 10.75 |
| 21       | 1225.86 | 35.49 |
| 20       | 1259.85 | 38.3  |
| 19       | 1276.09 | 16.25 |
| 18       | 1354.89 | 46.96 |
| 17       | 1389.15 | 34.69 |
| 16       | 1432.56 | 40.58 |
| 15       | 1471.12 | 53.94 |
| 14       | 1500.83 | 53.08 |
| 13       | 1568.18 | 55.55 |
| 12       | 1611.38 | 40.04 |
| 11       | 1629.8  | 43.03 |
| 酰胺羰基10   | 1675.27 | 5.6   |
| 酯羰基9     | 1743.85 | 10.31 |
| 8        | 2345.94 | 66.82 |
| 7        | 2854.86 | 53.2  |
| 6        | 2891.93 | 53.41 |
| 5        | 2925.23 | 56.32 |
| 4        | 3017.53 | 47.78 |
| 3        | 3054.1  | 49.22 |
| 2        | 3133.23 | 54.14 |
| NH 1     | 3435.68 | 53.38 |



S20121106-061

20121106

PROTON DMSO D:\nmr\_data ham

11.999  
9.187  
9.181  
8.592  
8.586  
8.571  
8.565  
7.836  
7.815  
7.750  
7.730  
7.628  
7.607  
7.589  
7.420  
7.399  
7.238  
7.218  
7.200  
6.655

3.332  
2.510  
2.506  
2.501  
1.235  
0.002



Current Data Parameters  
NAME S23  
EXPNO 10  
PROCNO 1

F2 - Acquisition Parameters  
Date\_ 20121107  
Time 5.35  
INSTRUM spect  
PROBHD 5 mm PABBO BB-  
PULPROG zg30  
TD 65536  
SOLVENT DMSO  
NS 16  
DS 2  
SWH 8223.685 Hz  
FIDRES 0.125483 Hz  
AQ 3.9846387 sec  
RG 203  
DW 60.800 usec  
DE 6.50 usec  
TE 298.0 K  
D1 1.00000000 sec

==== CHANNEL f1 =====  
NUC1 1H  
P1 14.50 usec  
PLW1 12.85299969 W  
SFO1 400.1324710 MHz

F2 - Processing parameters  
SI 65536  
SF 400.1300000 MHz  
WDW EM  
SSB 0  
LB 0.30 Hz  
GB 0  
PC 1.00

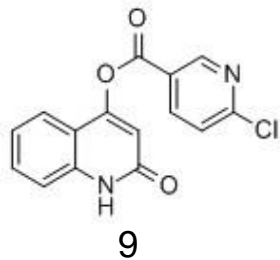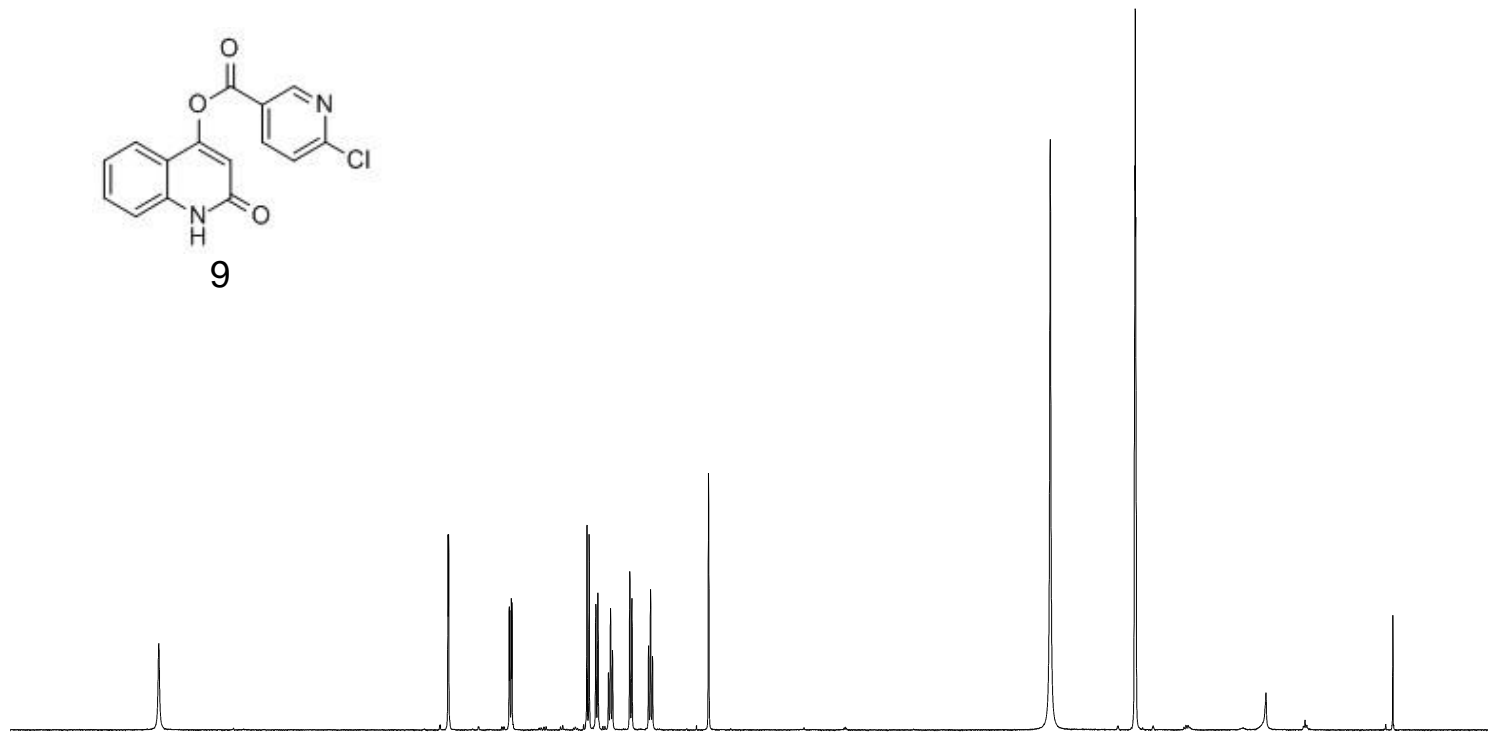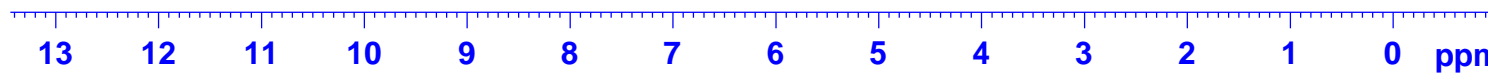

0.81  
0.90  
0.96  
1.00  
0.99  
0.95  
0.93  
0.96  
0.87

S20121106-061

20121106

C13CPD DMSO D:\nmr\_data ham

162.58  
162.11  
156.16  
155.82  
152.03  
141.62  
139.43  
132.14  
125.34  
124.58  
123.01  
122.65  
116.01  
115.01  
113.11

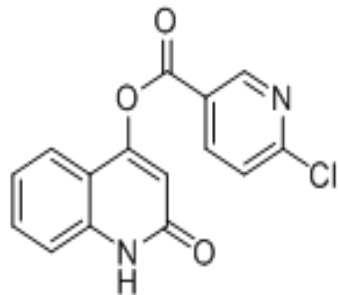

9

40.62  
40.41  
40.20  
39.99  
39.78  
39.57  
39.37



Current Data Parameters  
NAME S23  
EXPNO 11  
PROCNO 1

F2 - Acquisition Parameters  
Date\_ 20121107  
Time 6.35  
INSTRUM spect  
PROBHD 5 mm PABBO BB-  
PULPROG zgpg30  
TD 65536  
SOLVENT DMSO  
NS 1024  
DS 4  
SWH 24038.461 Hz  
FIDRES 0.366798 Hz  
AQ 1.3631988 sec  
RG 203  
DW 20.800 usec  
DE 6.50 usec  
TE 298.7 K  
D1 2.0000000 sec  
D11 0.0300000 sec

==== CHANNEL f1 =====  
NUC1 13C  
P1 9.65 usec  
PLW1 49.65900040 W  
SFO1 100.6228293 MHz

==== CHANNEL f2 =====  
CPDPRG2 waltz16  
NUC2 1H  
PCPD2 90.00 usec  
PLW2 12.85299969 W  
PLW12 0.34196001 W  
PLW13 0.27699000 W  
SFO2 400.1316005 MHz

F2 - Processing parameters  
SI 32768  
SF 100.6127690 MHz  
WDW EM  
SSB 0  
LB 1.00 Hz  
GB 0  
PC 1.40

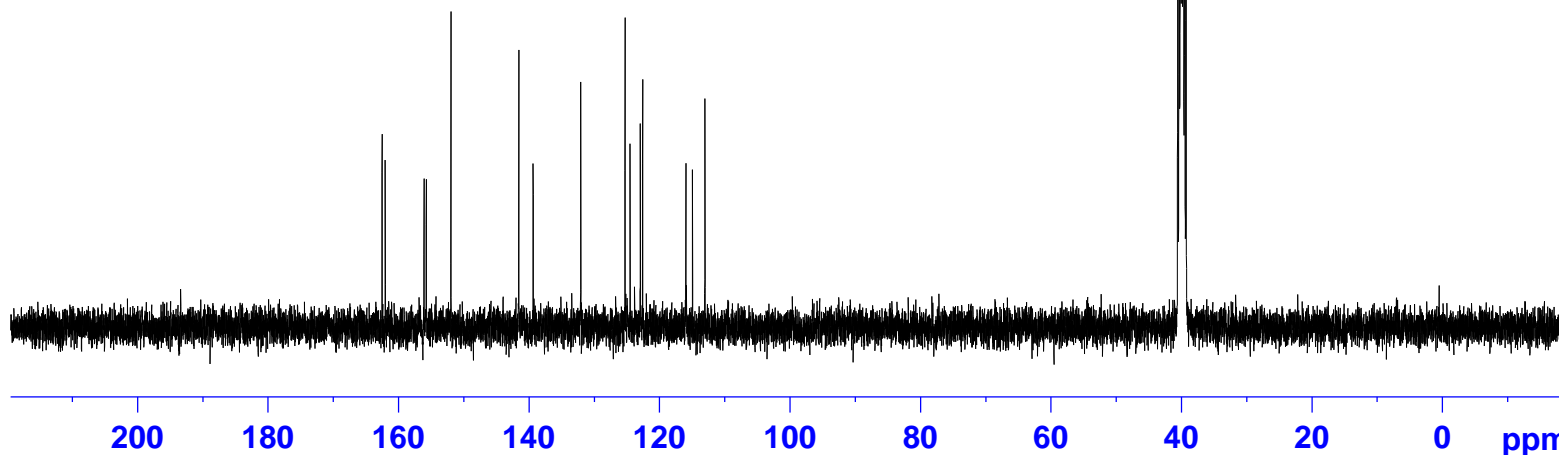

Spectrum Graph

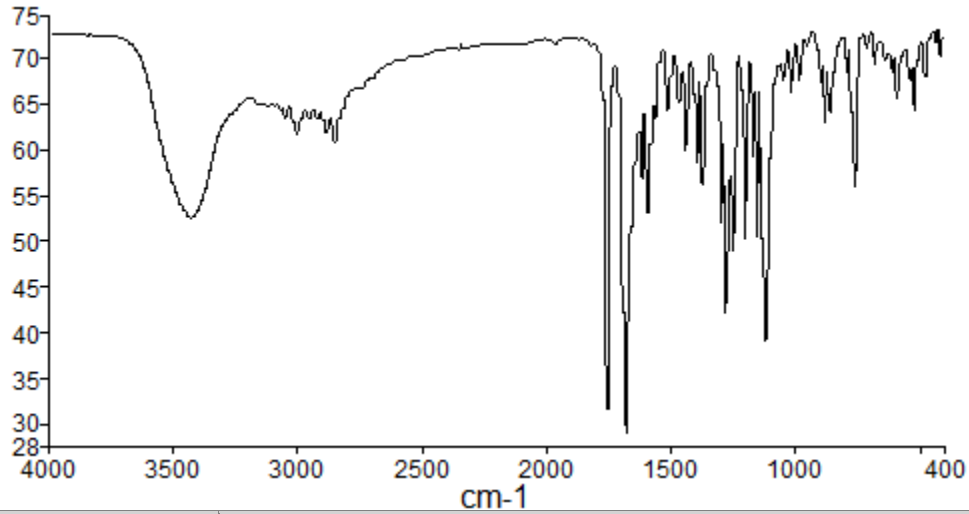

| 名称                | 说明 |
|-------------------|----|
| S20121127-073-S23 |    |

Search Result  
Peak Table Results

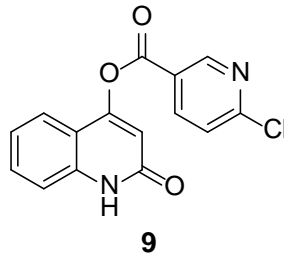

| 频谱名               |
|-------------------|
| S20121127-073-S23 |

| 峰值名 | X      | Y     |
|-----|--------|-------|
| 38  | 408.56 | 70.46 |
| 37  | 468.14 | 68.17 |
| 36  | 511.67 | 64.41 |
| 35  | 522.29 | 67.81 |
| 34  | 582.78 | 65.77 |
| 33  | 601.64 | 68.56 |
| 32  | 676.13 | 69.55 |
| 31  | 710.98 | 71.16 |
| 30  | 751.97 | 56.1  |
| 29  | 781.35 | 68.53 |

|    |         |       |
|----|---------|-------|
| 28 | 851.59  | 64.27 |
| 27 | 873.72  | 63.2  |
| 26 | 896.3   | 67.63 |
| 25 | 979.93  | 67.72 |
| 24 | 1013.36 | 66.52 |
| 23 | 1042.83 | 67.72 |
| 22 | 1112.47 | 39.12 |
| 21 | 1146.96 | 50.57 |
| 20 | 1163.78 | 59.52 |
| 19 | 1199.34 | 50.23 |
| 18 | 1245.26 | 49.07 |
| 17 | 1275.62 | 42.34 |
| 16 | 1294.55 | 51.97 |
| 15 | 1367.75 | 56.25 |
| 14 | 1393.93 | 58.59 |
| 13 | 1440.12 | 60.1  |
| 12 | 1460.65 | 65.31 |
| 11 | 1502.33 | 64.55 |
| 10 | 1563.72 | 63.19 |
| 9  | 1588.83 | 53.1  |
| 8  | 1613.44 | 56.9  |
| 7  | 1682.92 | 28.87 |
| 6  | 1753.3  | 31.68 |
| 5  | 2856.54 | 60.99 |
| 4  | 2893    | 61.95 |
| 3  | 3012.43 | 61.98 |
| 2  | 3058.01 | 63.64 |
| 1  | 3435.56 | 52.71 |

S20120919-013

20120919

PROTON DMSO d<sub>6</sub>: \nmr\_data ham

11.948  
7.961  
7.957  
7.942  
7.938  
7.759  
7.739  
7.692  
7.688  
7.670  
7.652  
7.648  
7.620  
7.600  
7.582  
7.579  
7.419  
7.399  
7.284  
7.261  
7.240  
7.222  
7.152  
7.133  
7.114  
6.538  
5.758  
4.238  
4.220  
4.203  
4.186  
3.333  
2.510  
2.505  
2.501  
1.393  
1.376  
1.359

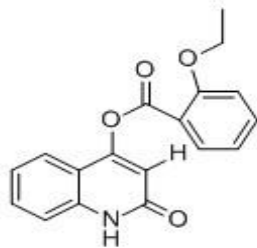

10



Current Data Parameters  
NAME SYPN-05  
EXPNO 10  
PROCNO 1

F2 - Acquisition Parameters  
Date\_ 20120919  
Time 10.59  
INSTRUM spect  
PROBHD 5 mm PABBO BB-  
PULPROG zg30  
TD 65536  
SOLVENT DMSO  
NS 16  
DS 2  
SWH 8223.685 Hz  
FIDRES 0.125483 Hz  
AQ 3.9846387 sec  
RG 203  
DW 60.800 usec  
DE 6.50 usec  
TE 298.0 K  
D1 1.00000000 sec

==== CHANNEL f1 =====  
NUC1 1H  
P1 14.50 usec  
PLW1 12.85299969 W  
SFO1 400.1324710 MHz

F2 - Processing parameters  
SI 65536  
SF 400.1300000 MHz  
WDW EM  
SSB 0  
LB 0.30 Hz  
GB 0  
PC 1.00

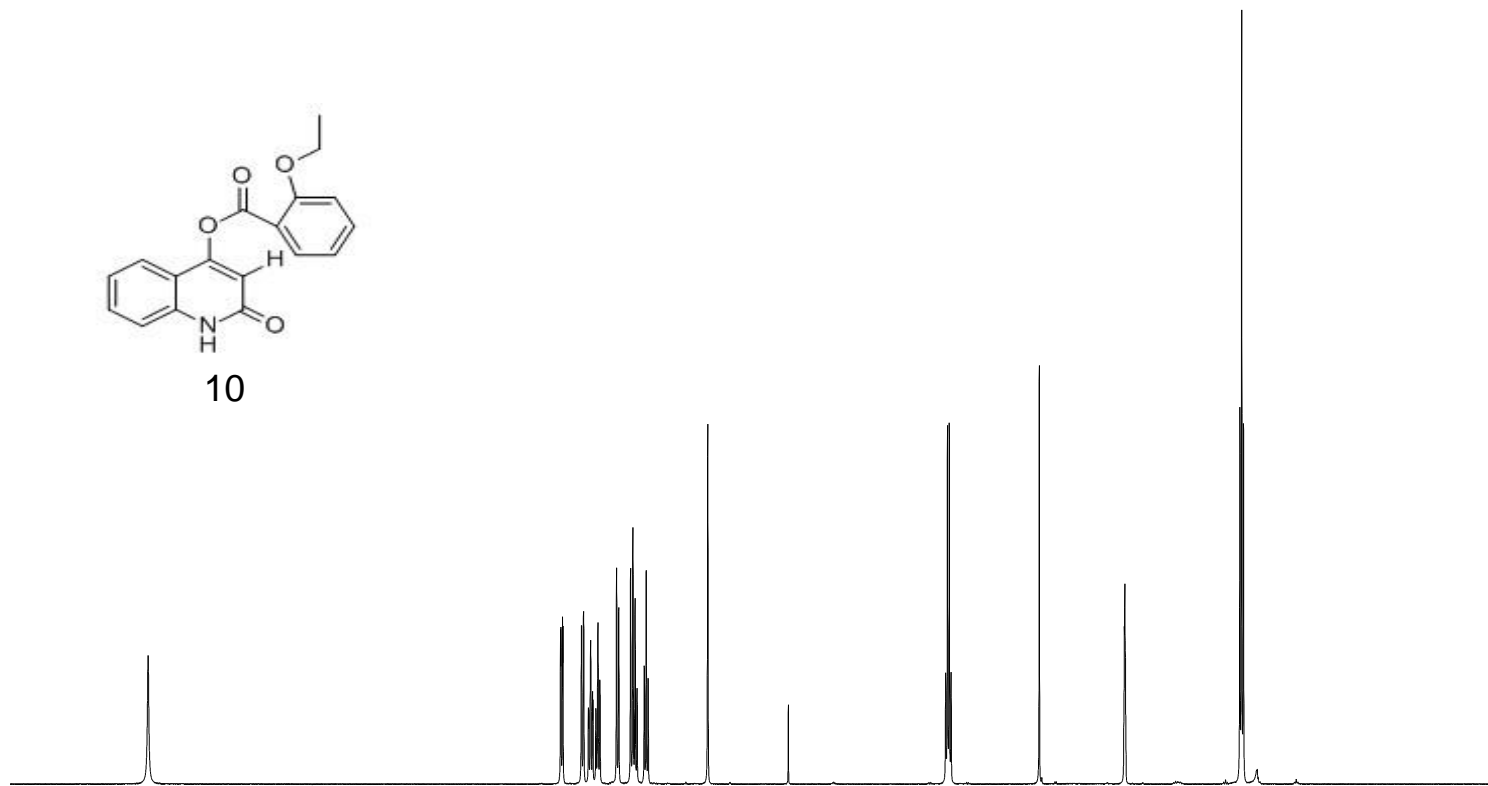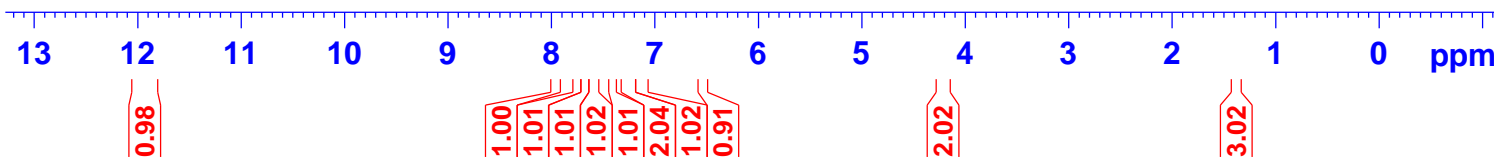

S20121106-072

20121107

C13CPD DMSO D:\nmr\_data ham

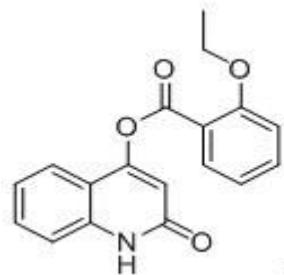

10

163.63  
162.74  
158.76  
156.76  
139.46  
135.47  
132.16  
131.99  
122.99  
122.48  
120.82  
118.51  
116.05  
115.34  
114.18  
112.91

64.80  
55.37  
40.62  
40.41  
40.20  
39.99  
39.78  
39.57  
39.36  
15.04

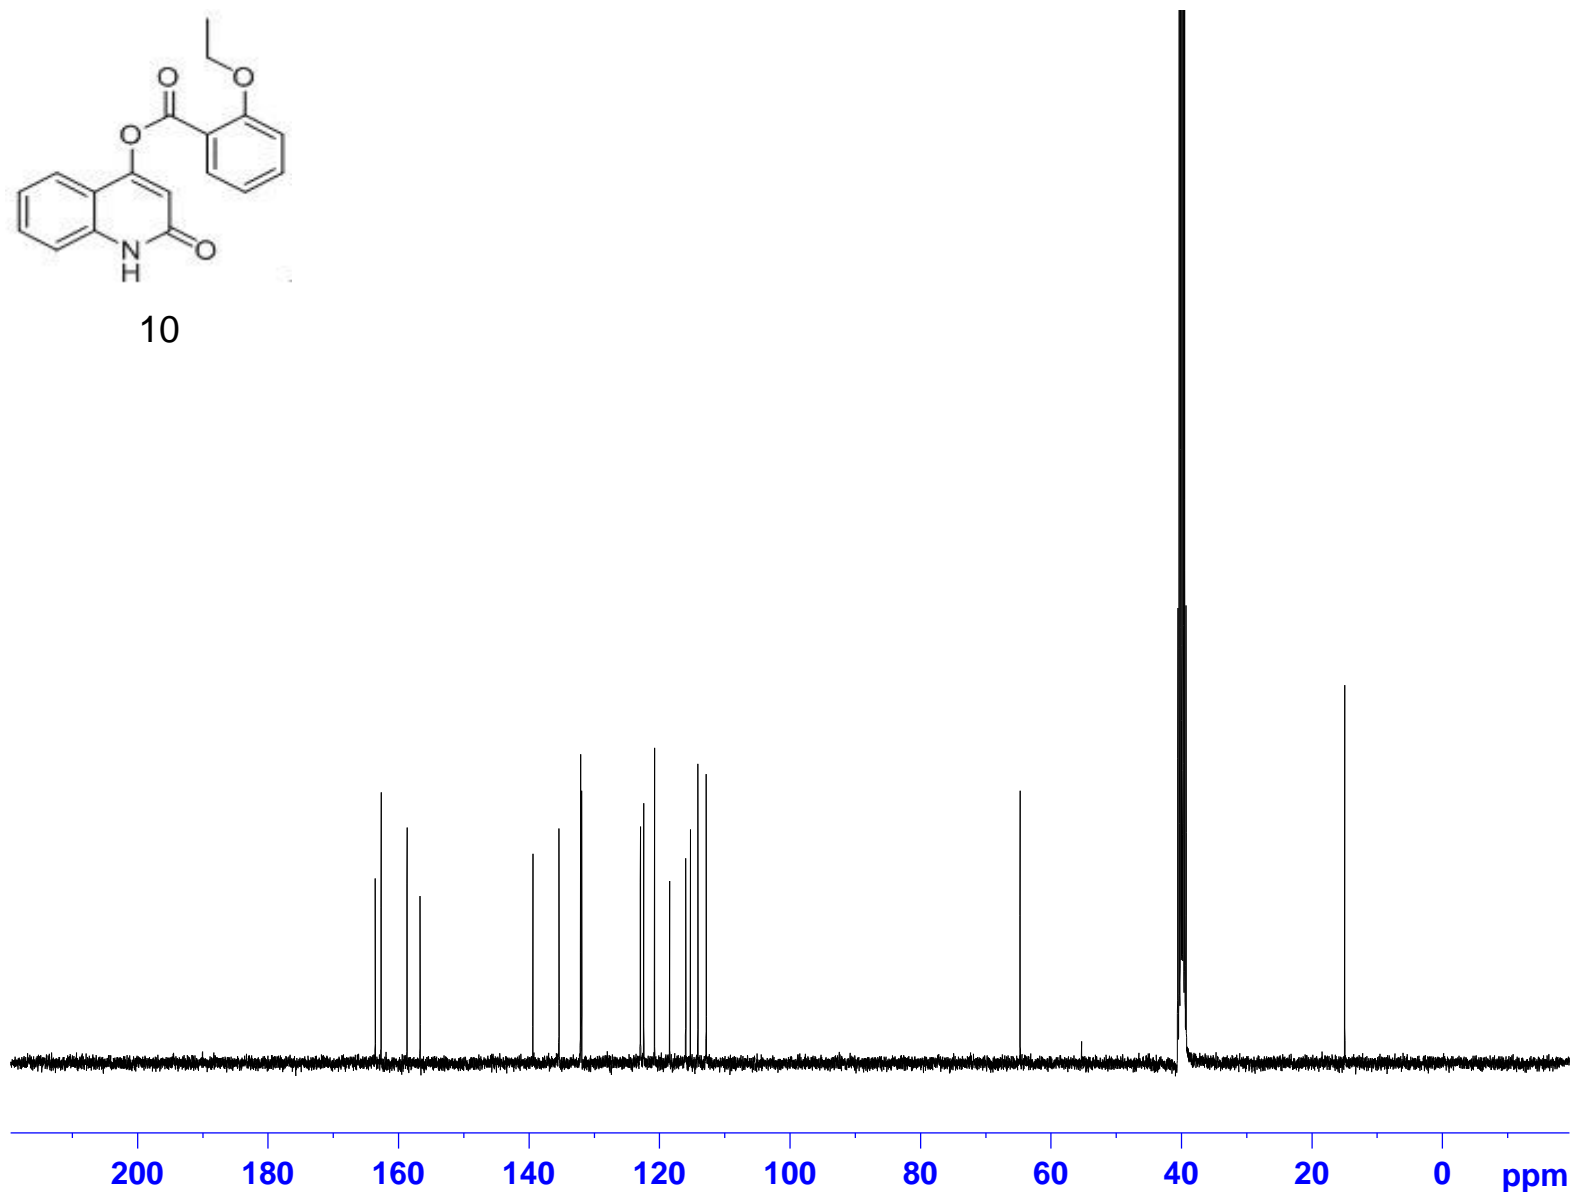

Current Data Parameters  
NAME S9  
EXPNO 10  
PROCNO 1

F2 - Acquisition Parameters  
Date\_ 20121108  
Time 2.13  
INSTRUM spect  
PROBHD 5 mm PABBO BB-  
PULPROG zgpg30  
TD 65536  
SOLVENT DMSO  
NS 1024  
DS 4  
SWH 24038.461 Hz  
FIDRES 0.366798 Hz  
AQ 1.3631988 sec  
RG 203  
DW 20.800 usec  
DE 6.50 usec  
TE 298.1 K  
D1 2.0000000 sec  
D11 0.0300000 sec

==== CHANNEL f1 =====  
NUC1 13C  
P1 9.65 usec  
PLW1 49.65900040 W  
SFO1 100.6228293 MHz

==== CHANNEL f2 =====  
CPDPRG2 waltz16  
NUC2 1H  
PCPD2 90.00 usec  
PLW2 12.85299969 W  
PLW12 0.34196001 W  
PLW13 0.27699000 W  
SFO2 400.1316005 MHz

F2 - Processing parameters  
SI 32768  
SF 100.6127690 MHz  
WDW EM  
SSB 0  
LB 1.00 Hz  
GB 0  
PC 1.40

Spectrum Graph

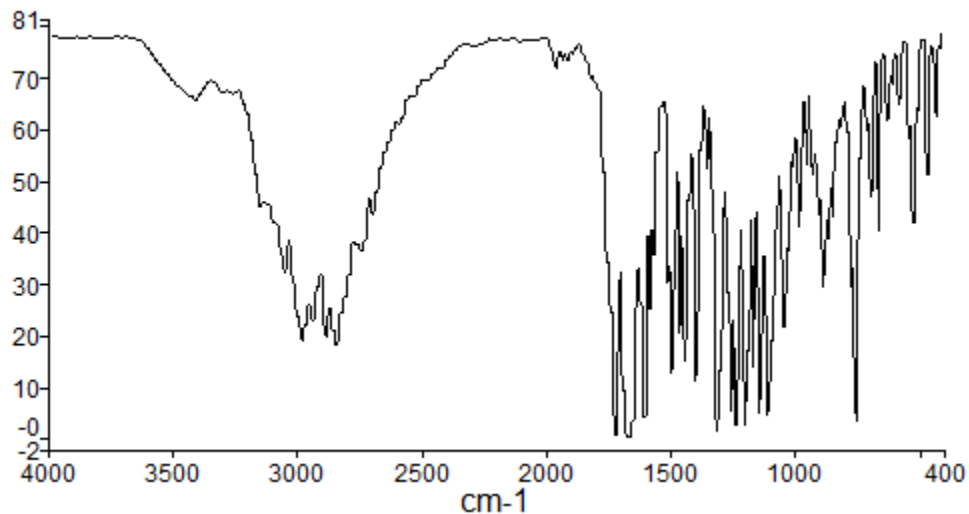

| 名称               | 说明 |
|------------------|----|
| S20121127-060-S9 |    |

Search Result  
Peak Table Results

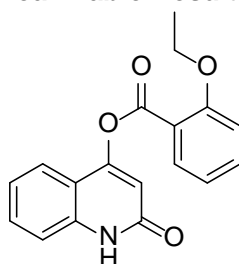

10

| 频谱名              |
|------------------|
| S20121127-060-S9 |

| 峰值名 | X      | Y     |
|-----|--------|-------|
| 57  | 421.6  | 62.95 |
| 56  | 458.91 | 51.49 |
| 55  | 516.63 | 42.25 |
| 54  | 530.14 | 54.34 |
| 53  | 574.78 | 65.26 |
| 52  | 601.84 | 69.4  |
| 51  | 615.25 | 62.78 |
| 50  | 625.78 | 62.36 |

|    |         |       |
|----|---------|-------|
| 49 | 660.99  | 40.53 |
| 48 | 687.17  | 47.11 |
| 47 | 707.39  | 60.25 |
| 46 | 744.47  | 3.32  |
| 45 | 762.41  | 31.77 |
| 44 | 769.49  | 29.87 |
| 43 | 804.75  | 61.01 |
| 42 | 841.21  | 43.37 |
| 41 | 864.44  | 37.67 |
| 40 | 881.48  | 29.74 |
| 39 | 901.02  | 43.73 |
| 38 | 922.42  | 51.75 |
| 37 | 945.81  | 53.87 |
| 36 | 978.42  | 41.48 |
| 35 | 1026.58 | 31.78 |
| 34 | 1039.4  | 22.01 |
| 33 | 1095.77 | 5.84  |
| 32 | 1108.81 | 4.97  |
| 31 | 1130.12 | 15.31 |
| 30 | 1138.33 | 5.42  |
| 29 | 1157.41 | 14.06 |
| 28 | 1194.48 | 2.65  |
| 27 | 1232.93 | 2.54  |
| 26 | 1255.16 | 5.35  |
| 25 | 1267.79 | 28.52 |
| 24 | 1307.63 | 1.22  |
| 23 | 1352.04 | 52.99 |
| 22 | 1398.78 | 10.89 |
| 21 | 1436.6  | 15.36 |
| 20 | 1457.72 | 20.91 |
| 19 | 1475.12 | 36.23 |
| 18 | 1494.48 | 12.64 |
| 17 | 1506.91 | 30.31 |
| 16 | 1568.47 | 35.79 |
| 15 | 1580.86 | 25.35 |
| 14 | 1602.6  | 4.02  |
| 13 | 1671.5  | 0.08  |
| 12 | 1716.87 | 0.47  |
| 11 | 1912.76 | 73.86 |
| 10 | 1959.52 | 72.24 |
| 9  | 2702    | 43.87 |
| 8  | 2742.47 | 36.54 |
| 7  | 2854.25 | 18.09 |
| 6  | 2890.73 | 20.05 |
| 5  | 2946.86 | 22.96 |
| 4  | 2984.73 | 19.07 |



|   |         |       |
|---|---------|-------|
| 3 | 3060.07 | 32.21 |
| 2 | 3154.18 | 45.32 |
| 1 | 3422.25 | 66.13 |

S20120919-014

20120919

PROTON DMSO D:\nmr\_data ham

11.974

7.836  
7.816  
7.681  
7.676  
7.672  
7.621  
7.606  
7.602  
7.587  
7.567  
7.422  
7.403  
7.399  
7.384  
7.378  
7.241  
7.223  
7.204  
6.605

3.881

3.328

2.510

2.506

2.501



Current Data Parameters  
NAME SYPN-06  
EXPNO 10  
PROCNO 1

F2 - Acquisition Parameters  
Date\_ 20120919  
Time 11.03  
INSTRUM spect  
PROBHD 5 mm PABBO BB-  
PULPROG zg30  
TD 65536  
SOLVENT DMSO  
NS 16  
DS 2  
SWH 8223.685 Hz  
FIDRES 0.125483 Hz  
AQ 3.9846387 sec  
RG 203  
DW 60.800 usec  
DE 6.50 usec  
TE 298.0 K  
D1 1.00000000 sec

==== CHANNEL f1 =====  
NUC1 1H  
P1 14.50 usec  
PLW1 12.85299969 W  
SFO1 400.1324710 MHz

F2 - Processing parameters  
SI 65536  
SF 400.1300000 MHz  
WDW EM  
SSB 0  
LB 0.30 Hz  
GB 0  
PC 1.00

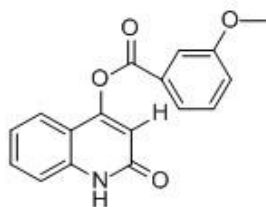

11

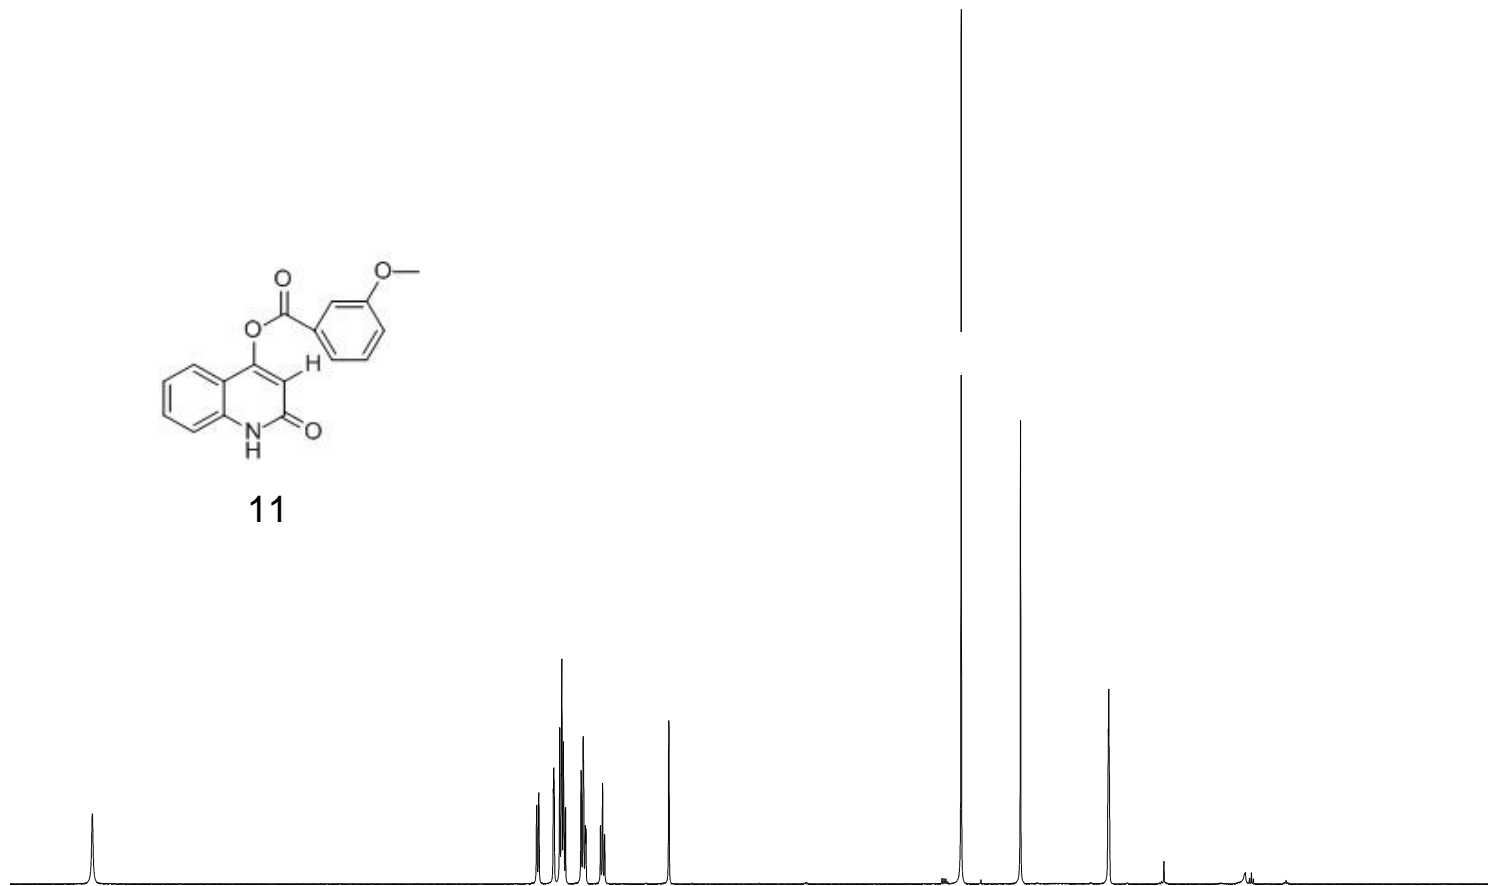

0.95

1.00  
1.00  
2.99  
1.98  
1.01  
0.90

2.99

12 11 10 9 8 7 6 5 4 3 2 1 0 ppm

S20121106-069

20121107

C13CPD DMSO D:\nmr\_data ham

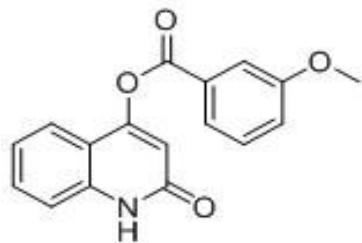

11

163.61  
162.67  
160.02  
156.53  
139.44  
132.05  
130.88  
129.71  
122.88  
122.70  
122.67  
121.24  
116.08  
115.22  
115.04  
113.10

56.01  
40.62  
40.41  
40.20  
39.99  
39.78  
39.57  
39.36

— 0.56



Current Data Parameters  
NAME S6  
EXPNO 10  
PROCNO 1

F2 - Acquisition Parameters  
Date\_ 20121107  
Time 23.10  
INSTRUM spect  
PROBHD 5 mm PABBO BB-  
PULPROG zgpg30  
TD 65536  
SOLVENT DMSO  
NS 1024  
DS 4  
SWH 24038.461 Hz  
FIDRES 0.366798 Hz  
AQ 1.3631988 sec  
RG 203  
DW 20.800 usec  
DE 6.50 usec  
TE 298.1 K  
D1 2.0000000 sec  
D11 0.0300000 sec

==== CHANNEL f1 =====  
NUC1 13C  
P1 9.65 usec  
PLW1 49.65900040 W  
SFO1 100.6228293 MHz

==== CHANNEL f2 =====  
CPDPRG2 waltz16  
NUC2 1H  
PCPD2 90.00 usec  
PLW2 12.85299969 W  
PLW12 0.34196001 W  
PLW13 0.27699000 W  
SFO2 400.1316005 MHz

F2 - Processing parameters  
SI 32768  
SF 100.6127690 MHz  
WDW EM  
SSB 0  
LB 1.00 Hz  
GB 0  
PC 1.40

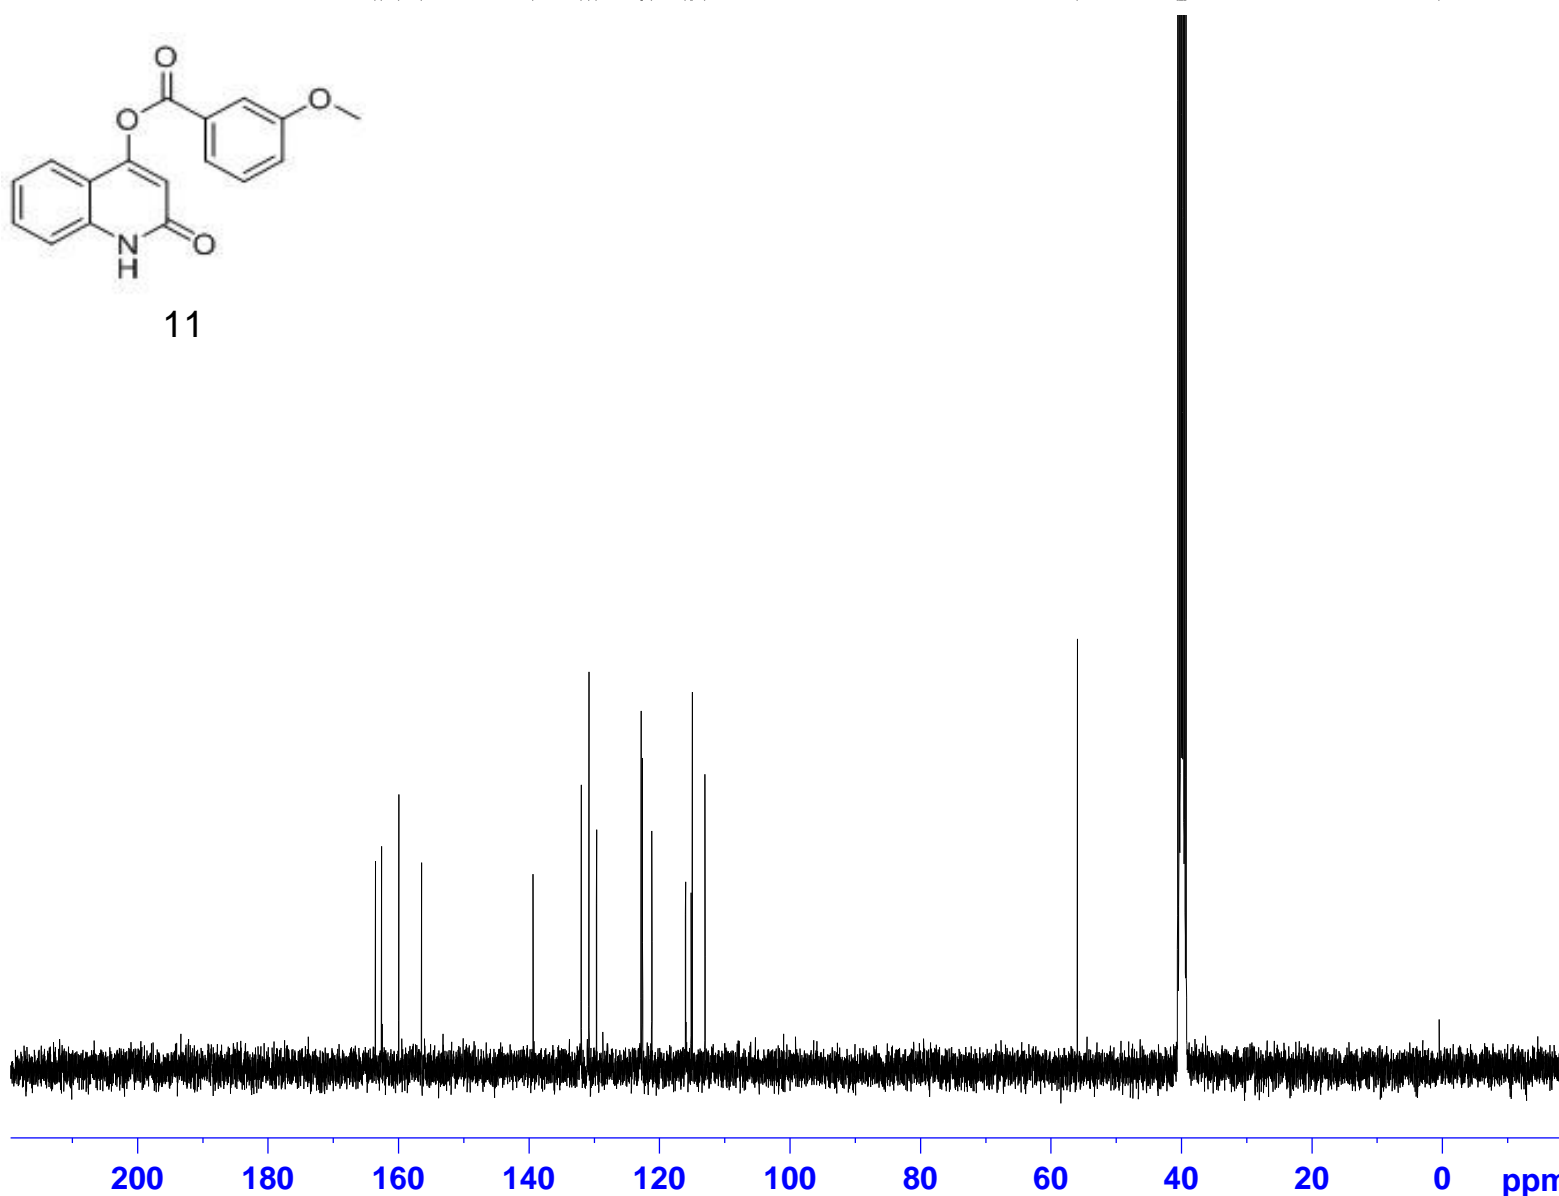

Spectrum Graph

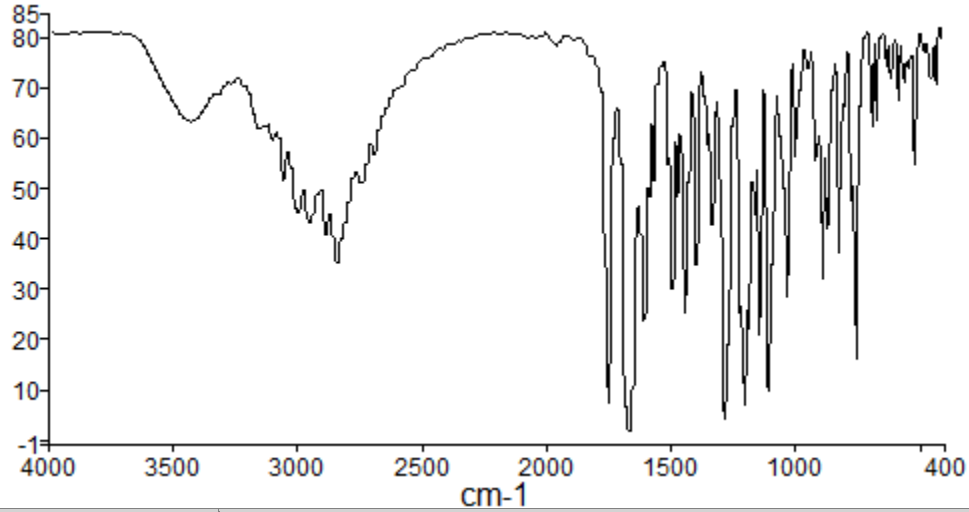

| 名称               | 说明 |
|------------------|----|
| S20121127-056-S5 |    |

Search Result  
Peak Table Results

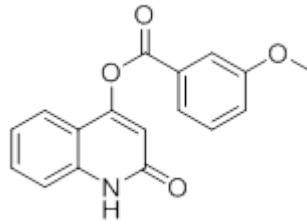

11

| 频谱名              |
|------------------|
| S20121127-018-S5 |

| 峰值名 | X      | Y     |
|-----|--------|-------|
| 55  | 423.8  | 71.02 |
| 54  | 444.47 | 72.53 |
| 53  | 454.07 | 72.08 |
| 52  | 473.03 | 77.42 |
| 51  | 512.35 | 54.9  |
| 50  | 529.67 | 74.35 |
| 49  | 553.73 | 71.52 |
| 48  | 577.18 | 67.99 |
| 47  | 608.28 | 72.47 |

|          |         |       |
|----------|---------|-------|
| 46       | 630.77  | 74.73 |
| 45       | 661.06  | 63.85 |
| 44       | 678.15  | 62.83 |
| 43       | 689.82  | 72.92 |
| 42       | 742.16  | 16.13 |
| 41       | 765.41  | 47.57 |
| 40       | 800.65  | 63.82 |
| 39       | 820.58  | 37.35 |
| 38       | 863.23  | 42.16 |
| 37       | 883.86  | 32.07 |
| 36       | 912.21  | 56.14 |
| 35       | 943.2   | 74.26 |
| 34       | 982.55  | 63.03 |
| 33       | 993.33  | 56.64 |
| 32       | 1026.72 | 29.72 |
| 31       | 1033.25 | 28.49 |
| 30       | 1047.42 | 55.93 |
| 芳基醚c-o29 | 1101.5  | 9.81  |
| 28       | 1138.41 | 21    |
| 27       | 1154.51 | 44.72 |
| 26       | 1182.16 | 21.98 |
| 酯c-o25   | 1196.31 | 6.81  |
| 24       | 1211.52 | 15.42 |
| 醚C-O23   | 1276.54 | 3.82  |
| 22       | 1329.03 | 42.72 |
| 21       | 1350.76 | 59.02 |
| 20       | 1392.51 | 34.74 |
| 19       | 1435.36 | 25.24 |
| 18       | 1467.84 | 48.43 |
| 17       | 1489.13 | 30.12 |
| 16       | 1500.98 | 53.14 |
| 15       | 1566.77 | 51.66 |
| 14       | 1585.65 | 48.55 |
| 13       | 1603.15 | 23.62 |
| 酰胺C=O12  | 1668.14 | 1.35  |
| 酯C=O11   | 1752.14 | 6.87  |
| 10       | 1953.68 | 78.66 |
| 9        | 2698.95 | 56.72 |
| 8        | 2755.02 | 51.24 |
| 7        | 2843.24 | 35.18 |
| 6        | 2887.56 | 40.93 |
| 5        | 2950.94 | 43.36 |
| 4        | 3007.64 | 45.14 |
| 3        | 3066.32 | 51.58 |
| 2        | 3105.57 | 59.8  |
| NH1      | 3435.38 | 63.65 |



S20120925-061

20120925

PROTON DMSO D:\nmr\_data ham

11.933

8.020  
8.003  
7.713  
7.699  
7.680  
7.601  
7.415  
7.394  
7.313  
7.292  
7.272  
7.253  
7.176  
7.158  
6.549

3.937

3.324

2.506

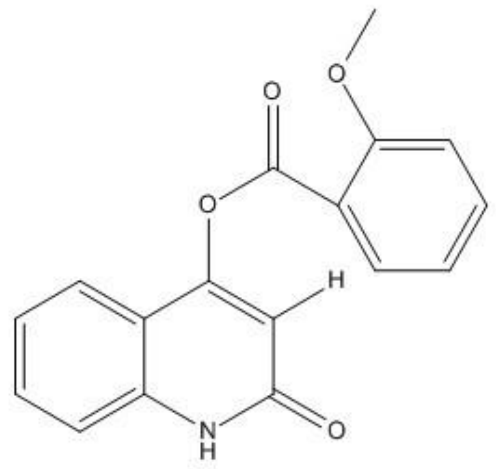

12

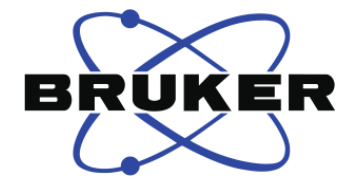

Current Data Parameters  
NAME SYP-N-15  
EXPNO 10  
PROCNO 1

F2 - Acquisition Parameters  
Date\_ 20120925  
Time 17.58  
INSTRUM spect  
PROBHD 5 mm PABBO BB-  
PULPROG zg30  
TD 65536  
SOLVENT DMSO  
NS 16  
DS 2  
SWH 8223.685 Hz  
FIDRES 0.125483 Hz  
AQ 3.9846387 sec  
RG 203  
DW 60.800 usec  
DE 6.50 usec  
TE 298.0 K  
D1 1.0000000 sec

==== CHANNEL f1 =====  
NUC1 1H  
P1 14.50 usec  
PLW1 12.85299969 W  
SFO1 400.1324710 MHz

F2 - Processing parameters  
SI 65536  
SF 400.1300000 MHz  
WDW EM  
SSB 0  
LB 0.30 Hz  
GB 0  
PC 1.00

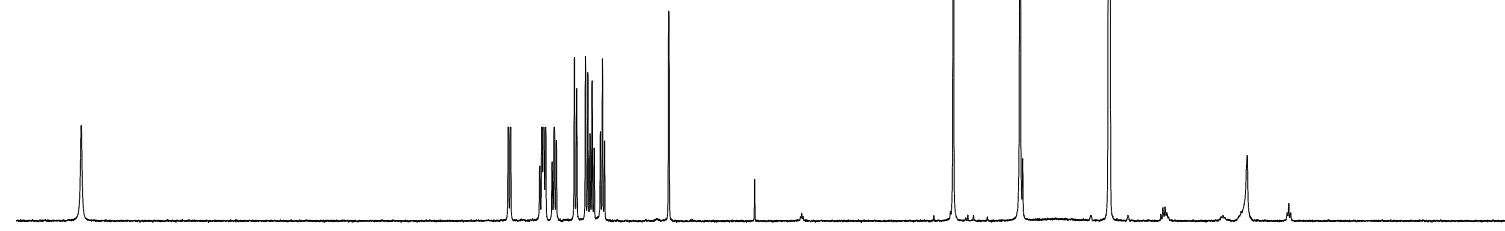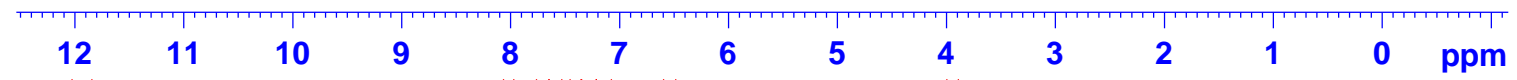

0.96

1.00  
2.02  
1.04  
1.03  
2.03  
1.07  
0.87

3.05

S20121106-071

20121107

C13CPD DMSO D:\nmr\_data ham

164.15  
162.73  
156.66  
141.41  
139.46  
134.09  
132.57  
131.97  
131.77  
131.59  
127.59  
126.94  
122.71  
122.69  
116.08  
115.39  
113.18

40.62  
40.41  
40.20  
39.99  
39.78  
39.57  
39.37  
21.78



Current Data Parameters  
NAME S8  
EXPNO 10  
PROCNO 1

F2 - Acquisition Parameters  
Date\_ 20121108  
Time 1.12  
INSTRUM spect  
PROBHD 5 mm PABBO BB-  
PULPROG zgpg30  
TD 65536  
SOLVENT DMSO  
NS 1024  
DS 4  
SWH 24038.461 Hz  
FIDRES 0.366798 Hz  
AQ 1.3631988 sec  
RG 203  
DW 20.800 usec  
DE 6.50 usec  
TE 298.1 K  
D1 2.0000000 sec  
D11 0.0300000 sec

=====  
CHANNEL f1  
NUC1 13C  
P1 9.65 usec  
PLW1 49.65900040 W  
SFO1 100.6228293 MHz

=====  
CHANNEL f2  
CPDPRG2 waltz16  
NUC2 1H  
PCPD2 90.00 usec  
PLW2 12.85299969 W  
PLW12 0.34196001 W  
PLW13 0.27699000 W  
SFO2 400.1316005 MHz

F2 - Processing parameters  
SI 32768  
SF 100.6127690 MHz  
WDW EM  
SSB 0  
LB 1.00 Hz  
GB 0  
PC 1.40

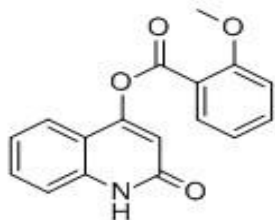

12

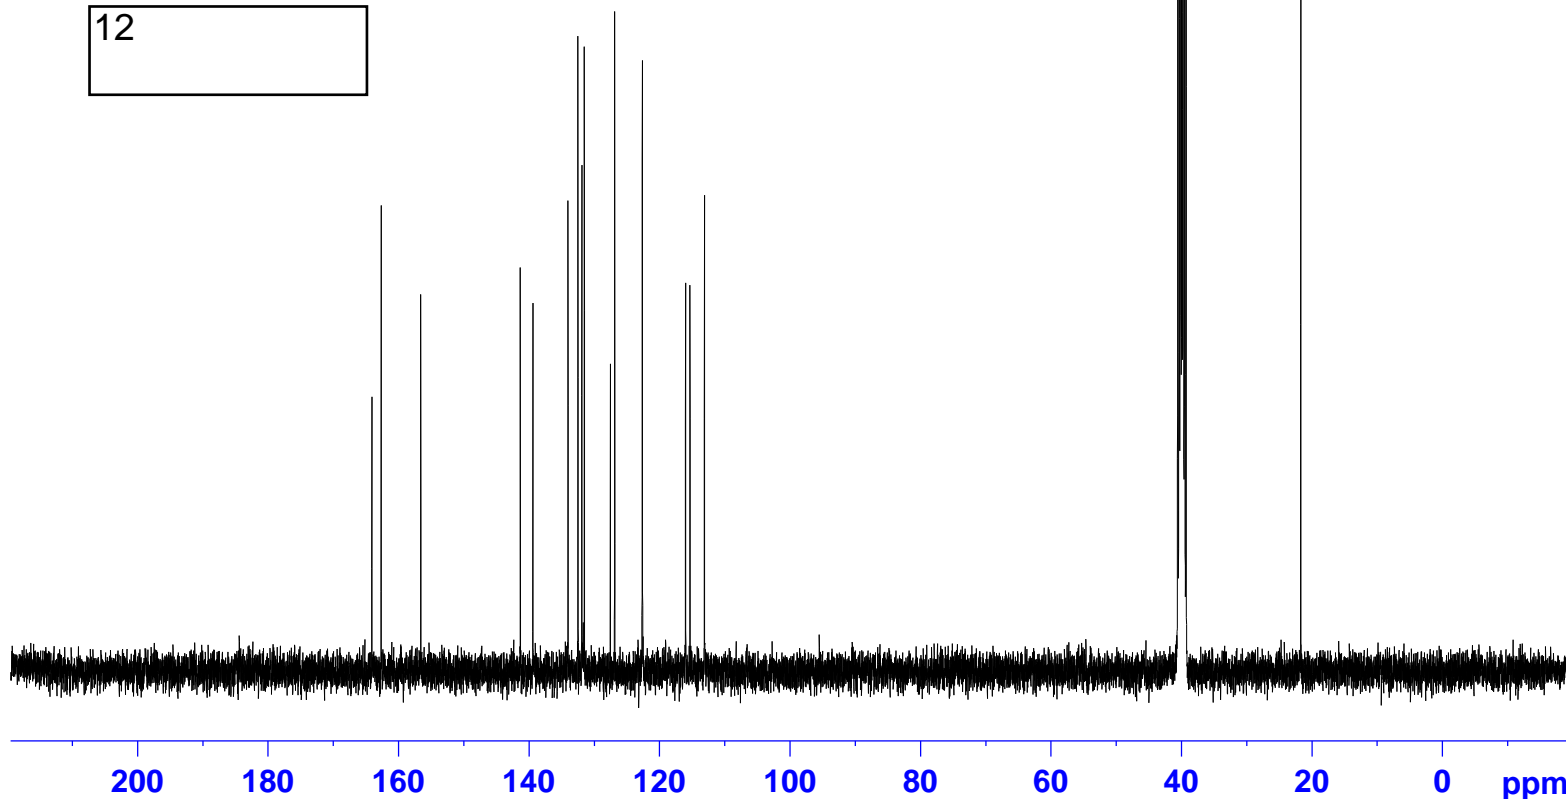



Spectrum Graph

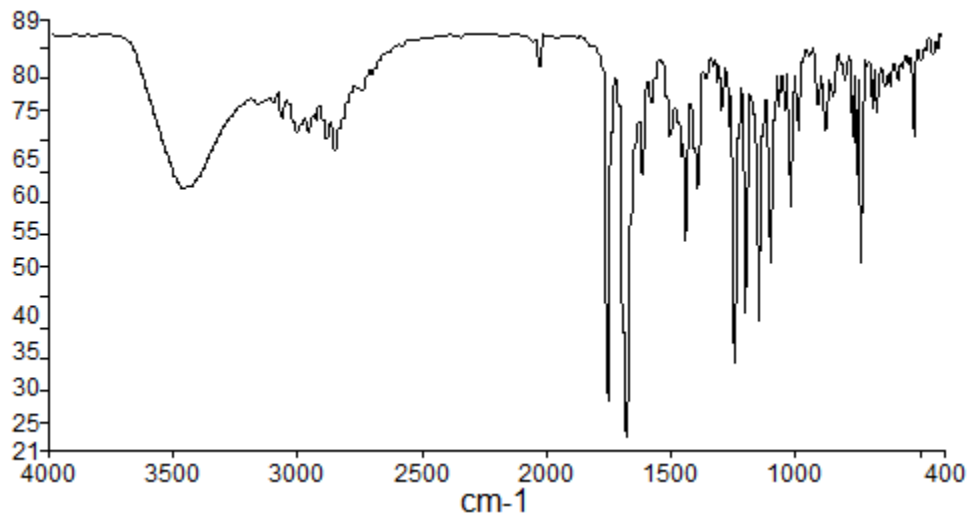

| 名称               | 说明 |
|------------------|----|
| S20121127-059-S8 |    |

Search Result  
Peak Table Results

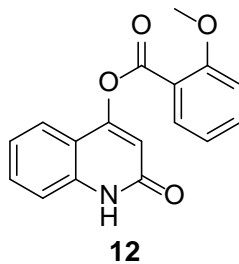

| 频谱名              |
|------------------|
| S20121127-021-S8 |

| 峰值名 | X      | Y     |
|-----|--------|-------|
| 42  | 437.34 | 84.33 |
| 41  | 486.96 | 83.21 |
| 40  | 512.27 | 71    |
| 39  | 529.44 | 81.62 |
| 38  | 577.02 | 80.14 |
| 37  | 605.73 | 79.08 |
| 36  | 630.19 | 79.08 |
| 35  | 664.06 | 74.9  |
| 34  | 683.84 | 75.5  |

|    |         |       |
|----|---------|-------|
| 33 | 728.42  | 50.43 |
| 32 | 745.47  | 64.95 |
| 31 | 764.93  | 71    |
| 30 | 793.36  | 80.12 |
| 29 | 839.78  | 77.48 |
| 28 | 877.3   | 72.1  |
| 27 | 902.14  | 76.26 |
| 26 | 978.95  | 72.03 |
| 25 | 1010.25 | 59.89 |
| 24 | 1035.69 | 75.28 |
| 23 | 1057.6  | 75.83 |
| 22 | 1091.34 | 50.64 |
| 21 | 1136.24 | 41.18 |
| 20 | 1195.29 | 42.35 |
| 19 | 1236.45 | 34.53 |
| 18 | 1263.48 | 72.58 |
| 17 | 1290.21 | 75.23 |
| 16 | 1307.02 | 79.85 |
| 15 | 1389.92 | 62.51 |
| 14 | 1438.51 | 54.2  |
| 13 | 1458.8  | 67.68 |
| 12 | 1507.52 | 70.99 |
| 11 | 1573.36 | 76.49 |
| 10 | 1613.99 | 64.63 |
| 9  | 1678.5  | 22.17 |
| 8  | 1749.51 | 28.13 |
| 7  | 2027.1  | 82.31 |
| 6  | 2858.43 | 68.73 |
| 5  | 2890.06 | 70.53 |
| 4  | 2966.78 | 71.74 |
| 3  | 3011.68 | 71.65 |
| 2  | 3068.8  | 73.81 |
| 1  | 3468.12 | 62.62 |

S20120925-060

20120925

PROTON DMSO D:\nmr\_data ham

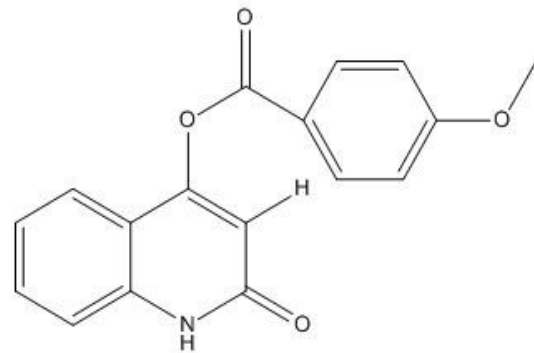

13

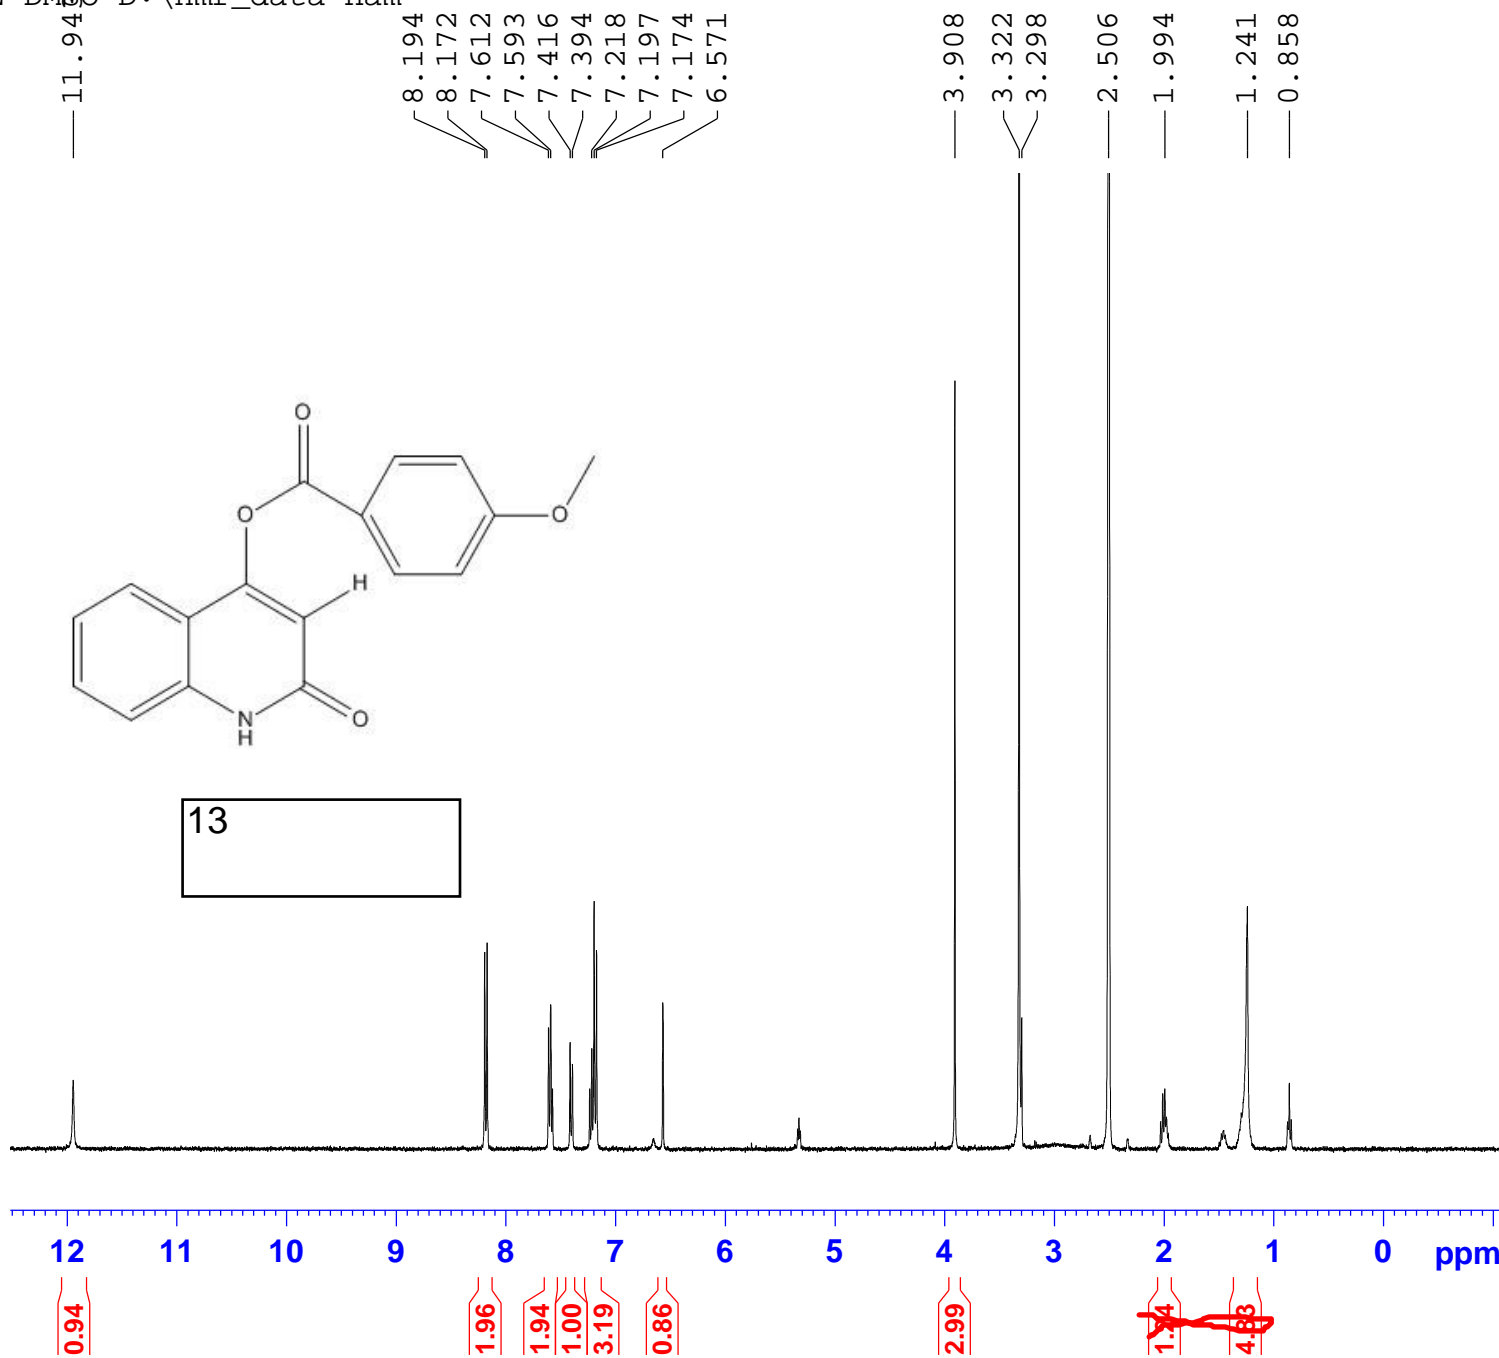

Current Data Parameters  
NAME SYP-N-14  
EXPNO 10  
PROCNO 1

F2 - Acquisition Parameters  
Date\_ 20120925  
Time 17.54  
INSTRUM spect  
PROBHD 5 mm PABBO BB-  
PULPROG zg30  
TD 65536  
SOLVENT DMSO  
NS 16  
DS 2  
SWH 8223.685 Hz  
FIDRES 0.125483 Hz  
AQ 3.9846387 sec  
RG 203  
DW 60.800 usec  
DE 6.50 usec  
TE 298.0 K  
D1 1.00000000 sec

==== CHANNEL f1 =====  
NUC1 1H  
P1 14.50 usec  
PLW1 12.85299969 W  
SFO1 400.1324710 MHz

F2 - Processing parameters  
SI 65536  
SF 400.1300000 MHz  
WDW EM  
SSB 0  
LB 0.30 Hz  
GB 0  
PC 1.00

S20121106-077

20121108

C13CPD DMSO D:\nmr\data ham

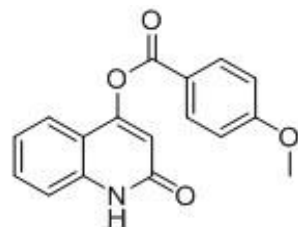

13

164.72  
163.36  
162.72  
156.62  
139.42  
132.92  
131.98  
122.65  
120.37  
116.07  
115.41  
115.02  
112.97

56.24  
40.62  
40.41  
40.20  
39.99  
39.78  
39.57  
39.36

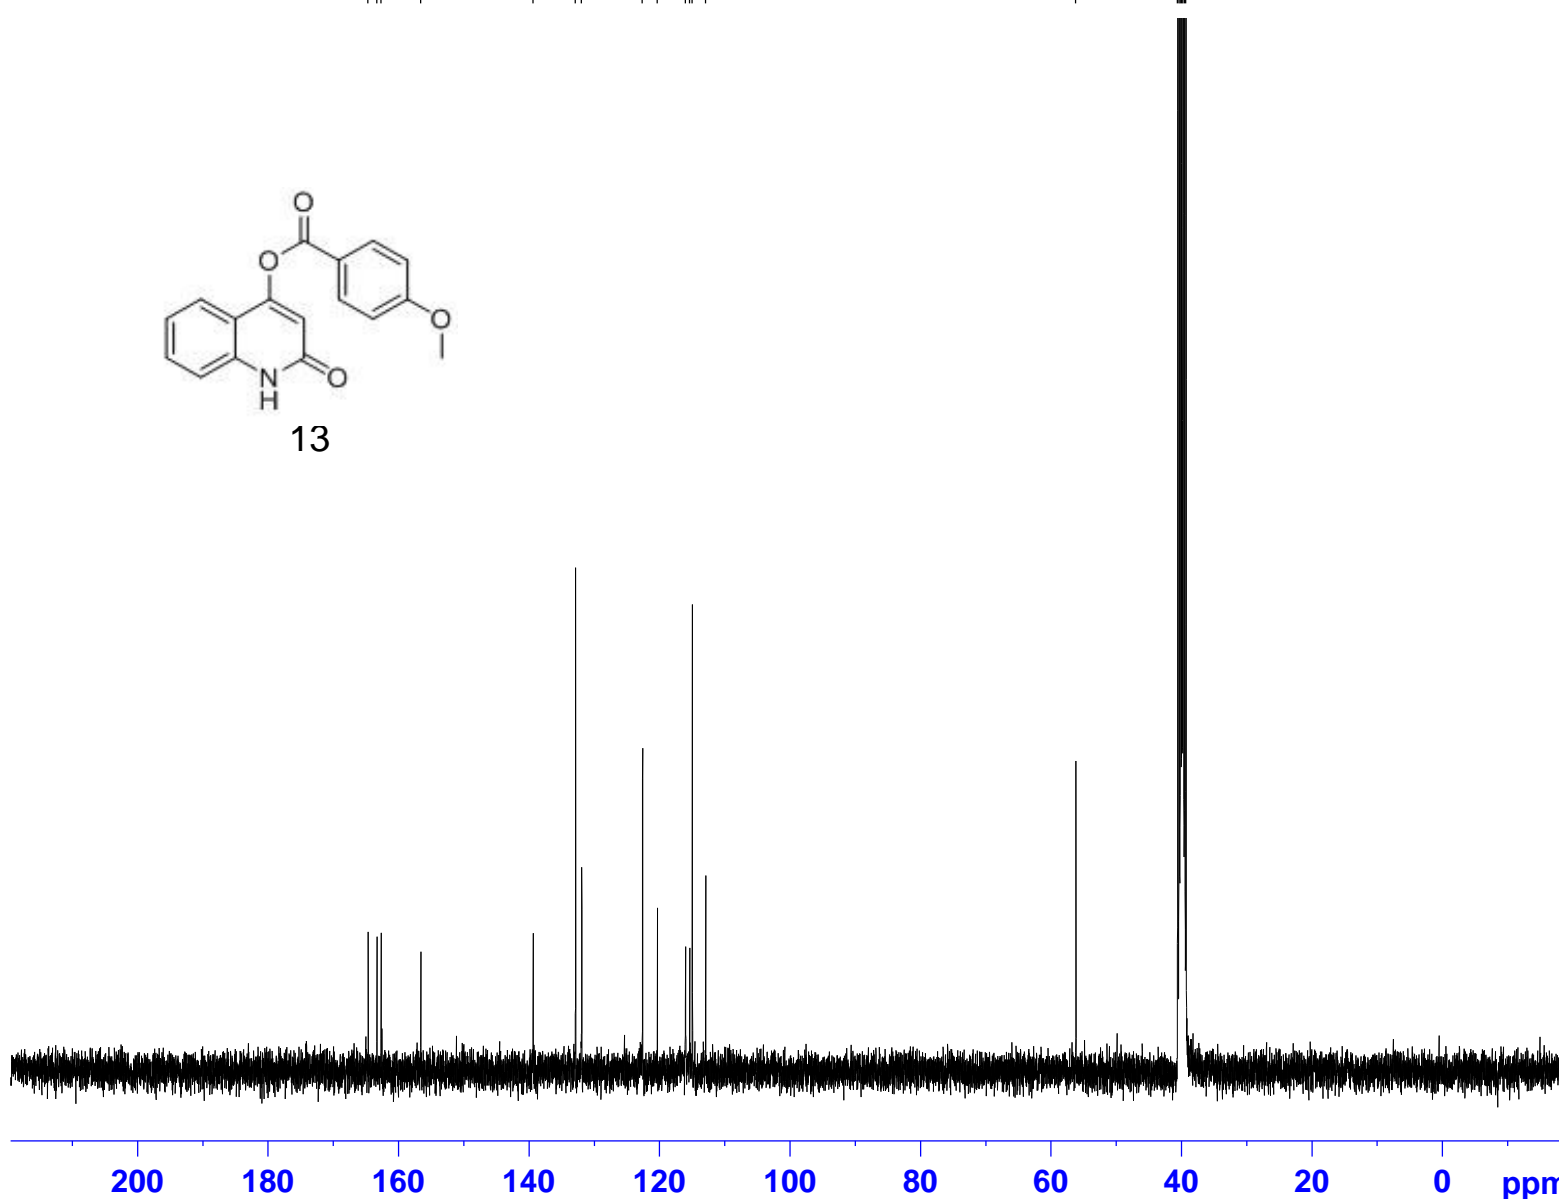

Current Data Parameters  
NAME S-15  
EXPNO 10  
PROCNO 1

F2 - Acquisition Parameters  
Date\_ 20121108  
Time 23.03  
INSTRUM spect  
PROBHD 5 mm PABBO BB-  
PULPROG zgpg30  
TD 65536  
SOLVENT DMSO  
NS 1024  
DS 4  
SWH 24038.461 Hz  
FIDRES 0.366798 Hz  
AQ 1.3631988 sec  
RG 203  
DW 20.800 usec  
DE 6.50 usec  
TE 298.0 K  
D1 2.0000000 sec  
D11 0.0300000 sec

==== CHANNEL f1 =====  
NUC1 13C  
P1 9.65 usec  
PLW1 49.65900040 W  
SFO1 100.6228293 MHz

==== CHANNEL f2 =====  
CPDPRG2 waltz16  
NUC2 1H  
PCPD2 90.00 usec  
PLW2 12.85299969 W  
PLW12 0.34196001 W  
PLW13 0.27699000 W  
SFO2 400.1316005 MHz

F2 - Processing parameters  
SI 32768  
SF 100.6127690 MHz  
WDW EM  
SSB 0  
LB 1.00 Hz  
GB 0  
PC 1.40

Spectrum Graph

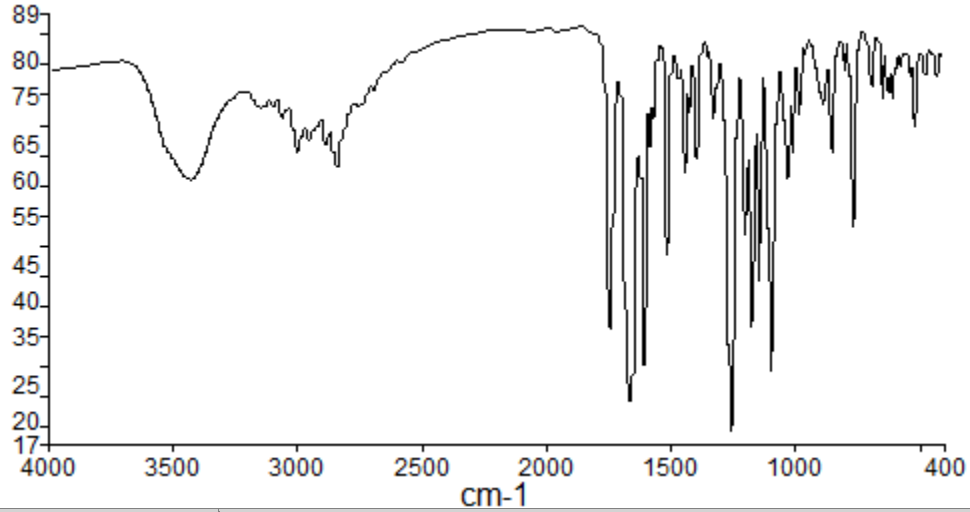

| 名称                | 说明 |
|-------------------|----|
| S20121127-065-S15 |    |

Search Result  
Peak Table Results

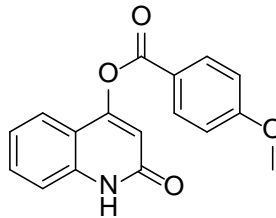

13

| 频谱名               |
|-------------------|
| S20121127-065-S15 |

| 峰值名 | X      | Y     |
|-----|--------|-------|
| 33  | 422.04 | 78.47 |
| 32  | 468.75 | 78.87 |
| 31  | 511.07 | 70.03 |
| 30  | 595.26 | 74.74 |
| 29  | 618.61 | 75.87 |
| 28  | 644.1  | 74.82 |
| 27  | 683.64 | 76.67 |
| 26  | 760.65 | 53.06 |
| 25  | 797.47 | 79.42 |
| 24  | 843.12 | 65.79 |

|    |         |       |
|----|---------|-------|
| 23 | 887.13  | 73.95 |
| 22 | 979.45  | 72.29 |
| 21 | 1004.72 | 65.99 |
| 20 | 1023.76 | 61.64 |
| 19 | 1092.61 | 29.11 |
| 18 | 1139.7  | 44.21 |
| 17 | 1169.14 | 36.72 |
| 16 | 1192.68 | 51.8  |
| 15 | 1251.73 | 18.84 |
| 14 | 1319.46 | 71.42 |
| 13 | 1390.84 | 64.49 |
| 12 | 1422.08 | 72.4  |
| 11 | 1437.14 | 62.05 |
| 10 | 1511.18 | 48.43 |
| 9  | 1580.13 | 66.51 |
| 8  | 1605.58 | 29.82 |
| 7  | 1655.31 | 24.05 |
| 6  | 1743.01 | 36.36 |
| 5  | 2845.44 | 63.33 |
| 4  | 2890.02 | 66.81 |
| 3  | 2963.13 | 67.68 |
| 2  | 3010.34 | 65.83 |
| 1  | 3436.48 | 61.32 |

S20120919-011

20120919

PROTON DMSO-D<sub>6</sub>: \nmr\_data ham

11.902  
7.563  
7.545  
7.542  
7.507  
7.487  
7.458  
7.454  
7.437  
7.420  
7.402  
7.383  
7.370  
7.349  
7.331  
7.185  
7.165  
7.147  
6.416  
4.164

3.329  
2.510  
2.505  
2.501

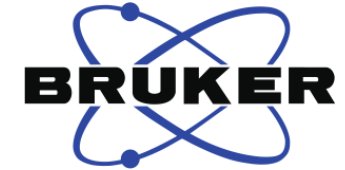

Current Data Parameters  
NAME SYPN-03  
EXPNO 10  
PROCNO 1

F2 - Acquisition Parameters  
Date\_ 20120919  
Time 10.51  
INSTRUM spect  
PROBHD 5 mm PABBO BB-  
PULPROG zg30  
TD 65536  
SOLVENT DMSO  
NS 16  
DS 2  
SWH 8223.685 Hz  
FIDRES 0.125483 Hz  
AQ 3.9846387 sec  
RG 203  
DW 60.800 usec  
DE 6.50 usec  
TE 298.0 K  
D1 1.00000000 sec

==== CHANNEL f1 =====  
NUC1 1H  
P1 14.50 usec  
PLW1 12.85299969 W  
SFO1 400.1324710 MHz

F2 - Processing parameters  
SI 65536  
SF 400.1300000 MHz  
WDW EM  
SSB 0  
LB 0.30 Hz  
GB 0  
PC 1.00

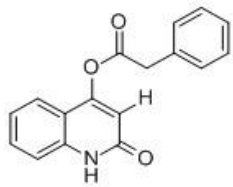

14

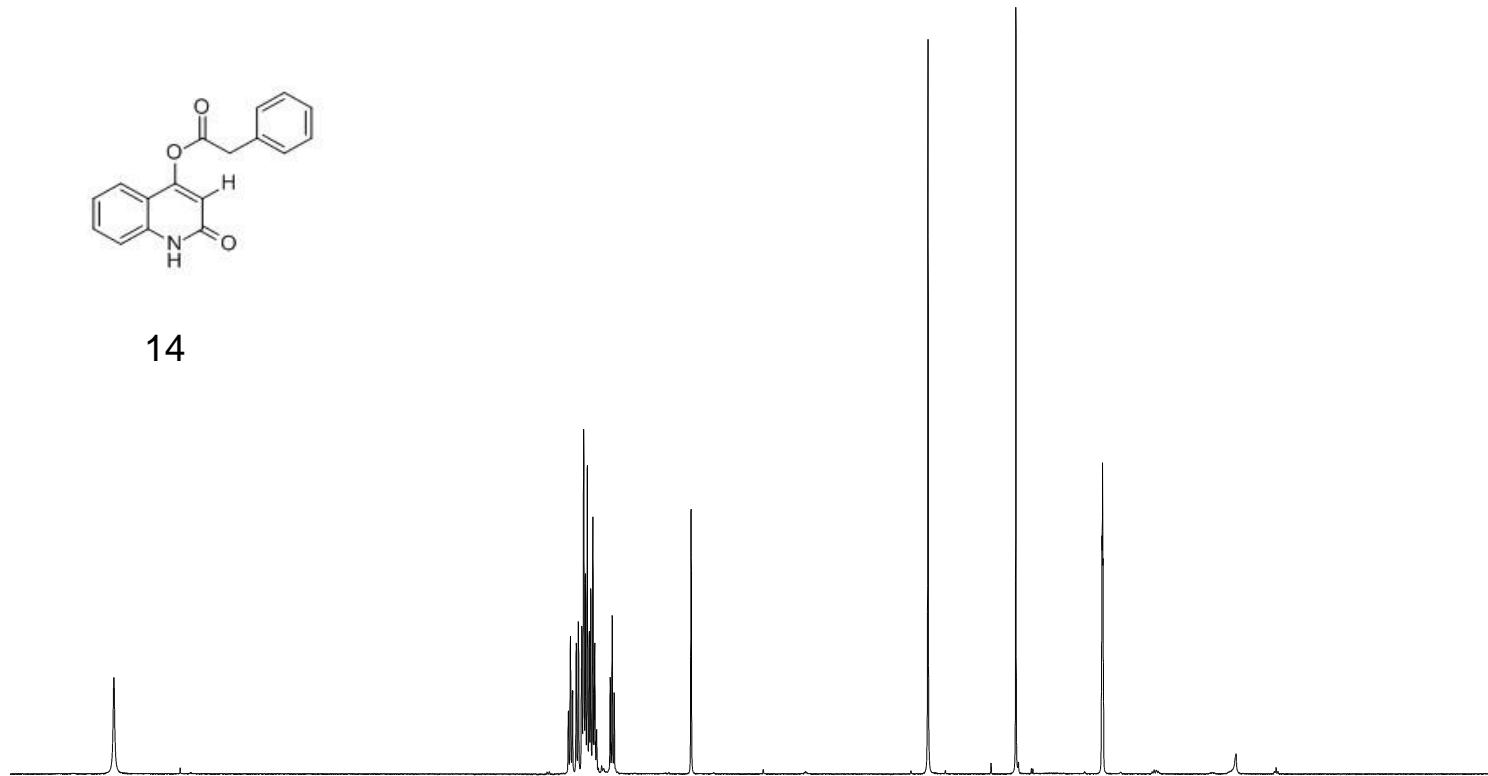

0.96

1.00  
1.01  
5.94  
1.05

0.91

2.00

12 11 10 9 8 7 6 5 4 3 2 1 0 ppm

S20121106-073

20121108

C13CPD DMSO D:\nmr\_data ham

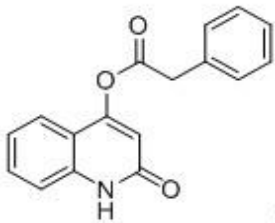

14

162.62  
156.14  
151.72  
139.39  
135.12  
132.15  
129.19  
129.07  
128.97  
122.66  
122.36  
116.06  
114.72  
112.04  
  
71.10  
  
40.62  
40.41  
40.20  
39.99  
39.78  
39.57  
39.36

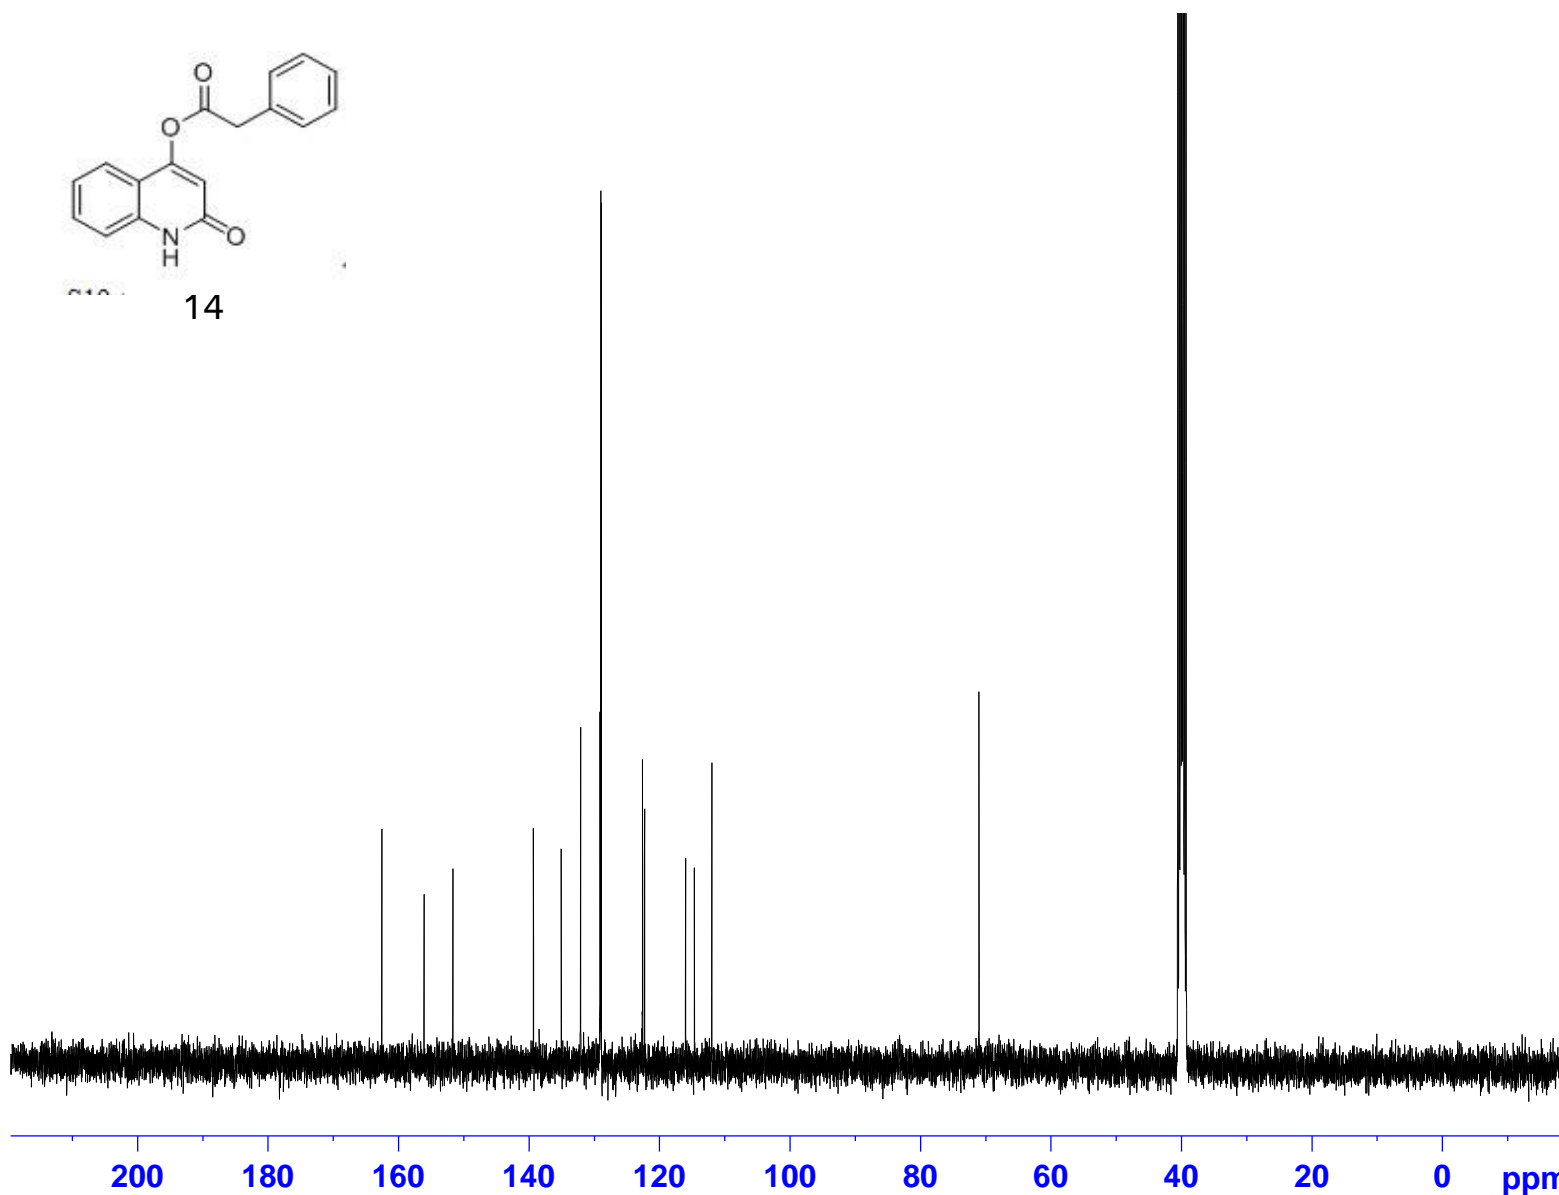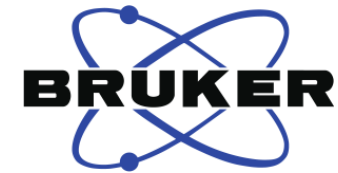

Current Data Parameters  
NAME S-19  
EXPNO 10  
PROCNO 1

F2 - Acquisition Parameters  
Date\_ 20121109  
Time 3.07  
INSTRUM spect  
PROBHD 5 mm PABBO BB-  
PULPROG zgpg30  
TD 65536  
SOLVENT DMSO  
NS 1024  
DS 4  
SWH 24038.461 Hz  
FIDRES 0.366798 Hz  
AQ 1.3631988 sec  
RG 203  
DW 20.800 usec  
DE 6.50 usec  
TE 298.0 K  
D1 2.0000000 sec  
D11 0.0300000 sec

==== CHANNEL f1 =====  
NUC1 13C  
P1 9.65 usec  
PLW1 49.65900040 W  
SFO1 100.6228293 MHz

==== CHANNEL f2 =====  
CPDPRG2 waltz16  
NUC2 1H  
PCPD2 90.00 usec  
PLW2 12.85299969 W  
PLW12 0.34196001 W  
PLW13 0.27699000 W  
SFO2 400.1316005 MHz

F2 - Processing parameters  
SI 32768  
SF 100.6127690 MHz  
WDW EM  
SSB 0  
LB 1.00 Hz  
GB 0  
PC 1.40



Spectrum Graph

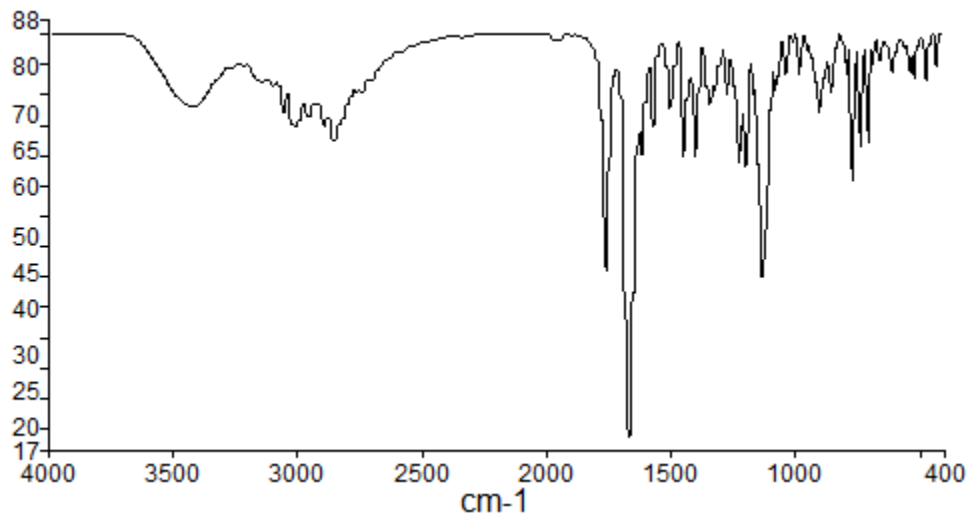

| 名称                | 说明 |
|-------------------|----|
| S20121127-069-S19 |    |

Search Result  
Peak Table Results

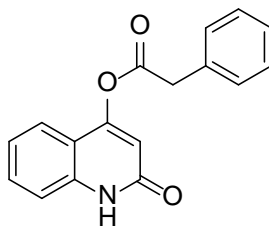

14

| 频谱名               |
|-------------------|
| S20121127-069-S19 |

| 峰值名 | X      | Y     |
|-----|--------|-------|
| 33  | 425.4  | 80.16 |
| 32  | 460.52 | 77.9  |
| 31  | 511.94 | 78.23 |
| 30  | 528.71 | 79.18 |
| 29  | 597.76 | 79    |
| 28  | 652.02 | 81.26 |
| 27  | 674.95 | 80.43 |
| 26  | 697.03 | 67.42 |
| 25  | 725.05 | 66.87 |

|    |         |       |
|----|---------|-------|
| 24 | 755.03  | 61.34 |
| 23 | 763     | 64.19 |
| 22 | 788.53  | 78.9  |
| 21 | 848     | 75.91 |
| 20 | 900.04  | 72.59 |
| 19 | 979.25  | 78.93 |
| 18 | 1032.76 | 78.84 |
| 17 | 1074.91 | 76.05 |
| 16 | 1122.63 | 45.1  |
| 15 | 1193    | 63.75 |
| 14 | 1214.55 | 64.26 |
| 13 | 1268.74 | 75.57 |
| 12 | 1343.8  | 73.99 |
| 11 | 1393.92 | 65.05 |
| 10 | 1439.27 | 64.84 |
| 9  | 1505.93 | 73.22 |
| 8  | 1567.28 | 70.13 |
| 7  | 1612.97 | 65.3  |
| 6  | 1668.4  | 18.22 |
| 5  | 1756.48 | 45.96 |
| 4  | 2858.9  | 67.53 |
| 3  | 3015.03 | 70.18 |
| 2  | 3063.96 | 72.43 |
| 1  | 3435.94 | 73.31 |

S20120903-007

20120903

PROTON DMSO D:\nmr\_data ham

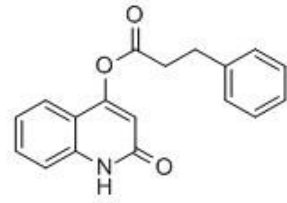

15

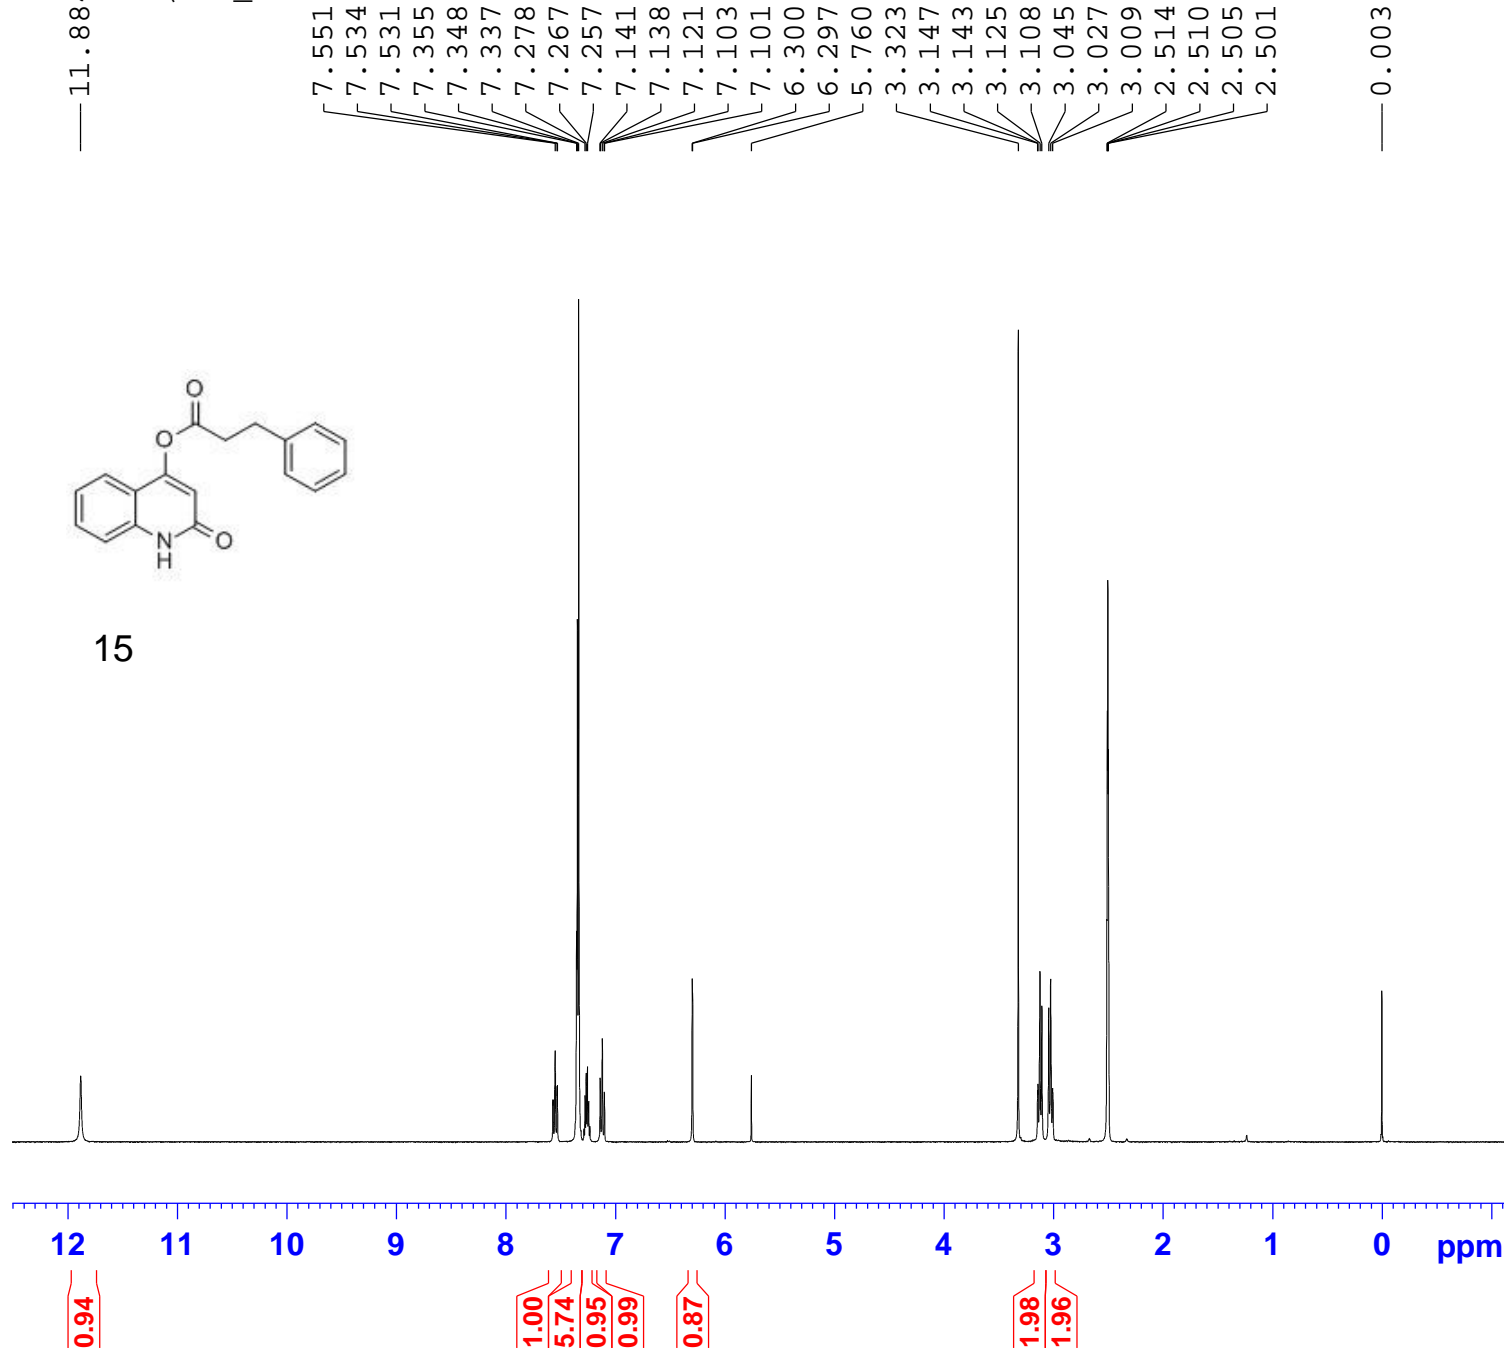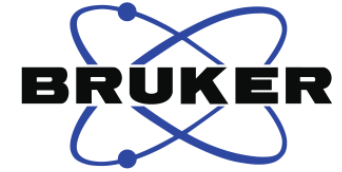

Current Data Parameters  
NAME 氯化肉桂酰氯  
EXPNO 16  
PROCNO 1

F2 - Acquisition Parameters  
Date\_ 20120903  
Time 10.58  
INSTRUM spect  
PROBHD 5 mm PABBO BB-  
PULPROG zg30  
TD 65536  
SOLVENT DMSO  
NS 16  
DS 2  
SWH 8223.685 Hz  
FIDRES 0.125483 Hz  
AQ 3.9846387 sec  
RG 203  
DW 60.800 usec  
DE 6.50 usec  
TE 298.0 K  
D1 1.00000000 sec

==== CHANNEL f1 =====  
NUC1 1H  
P1 14.50 usec  
PLW1 12.85299969 W  
SFO1 400.1324710 MHz

F2 - Processing parameters  
SI 65536  
SF 400.1300000 MHz  
WDW EM  
SSB 0  
LB 0.30 Hz  
GB 0  
PC 1.00

S20121106-065

20121107

C13CPD DMSO D:\nmr\_data\ham

170.47  
162.64  
162.54  
156.48  
140.47  
139.37  
139.23  
131.91  
128.93  
128.87  
126.79  
122.85  
122.41  
115.91  
115.18  
112.67

55.38  
40.62  
40.41  
40.20  
39.99  
39.78  
39.57  
39.36  
35.36  
30.50



Current Data Parameters  
NAME S2  
EXPNO 10  
PROCNO 1

F2 - Acquisition Parameters  
Date\_ 20121107  
Time 19.05  
INSTRUM spect  
PROBHD 5 mm PABBO BB-  
PULPROG zgpg30  
TD 65536  
SOLVENT DMSO  
NS 1024  
DS 4  
SWH 24038.461 Hz  
FIDRES 0.366798 Hz  
AQ 1.3631988 sec  
RG 203  
DW 20.800 usec  
DE 6.50 usec  
TE 298.1 K  
D1 2.0000000 sec  
D11 0.0300000 sec

==== CHANNEL f1 =====  
NUC1 13C  
P1 9.65 usec  
PLW1 49.65900040 W  
SFO1 100.6228293 MHz

==== CHANNEL f2 =====  
CPDPRG2 waltz16  
NUC2 1H  
PCPD2 90.00 usec  
PLW2 12.85299969 W  
PLW12 0.34196001 W  
PLW13 0.27699000 W  
SFO2 400.1316005 MHz

F2 - Processing parameters  
SI 32768  
SF 100.6127690 MHz  
WDW EM  
SSB 0  
LB 1.00 Hz  
GB 0  
PC 1.40

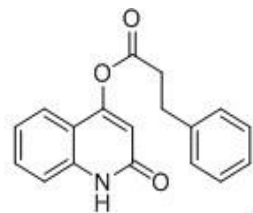

15

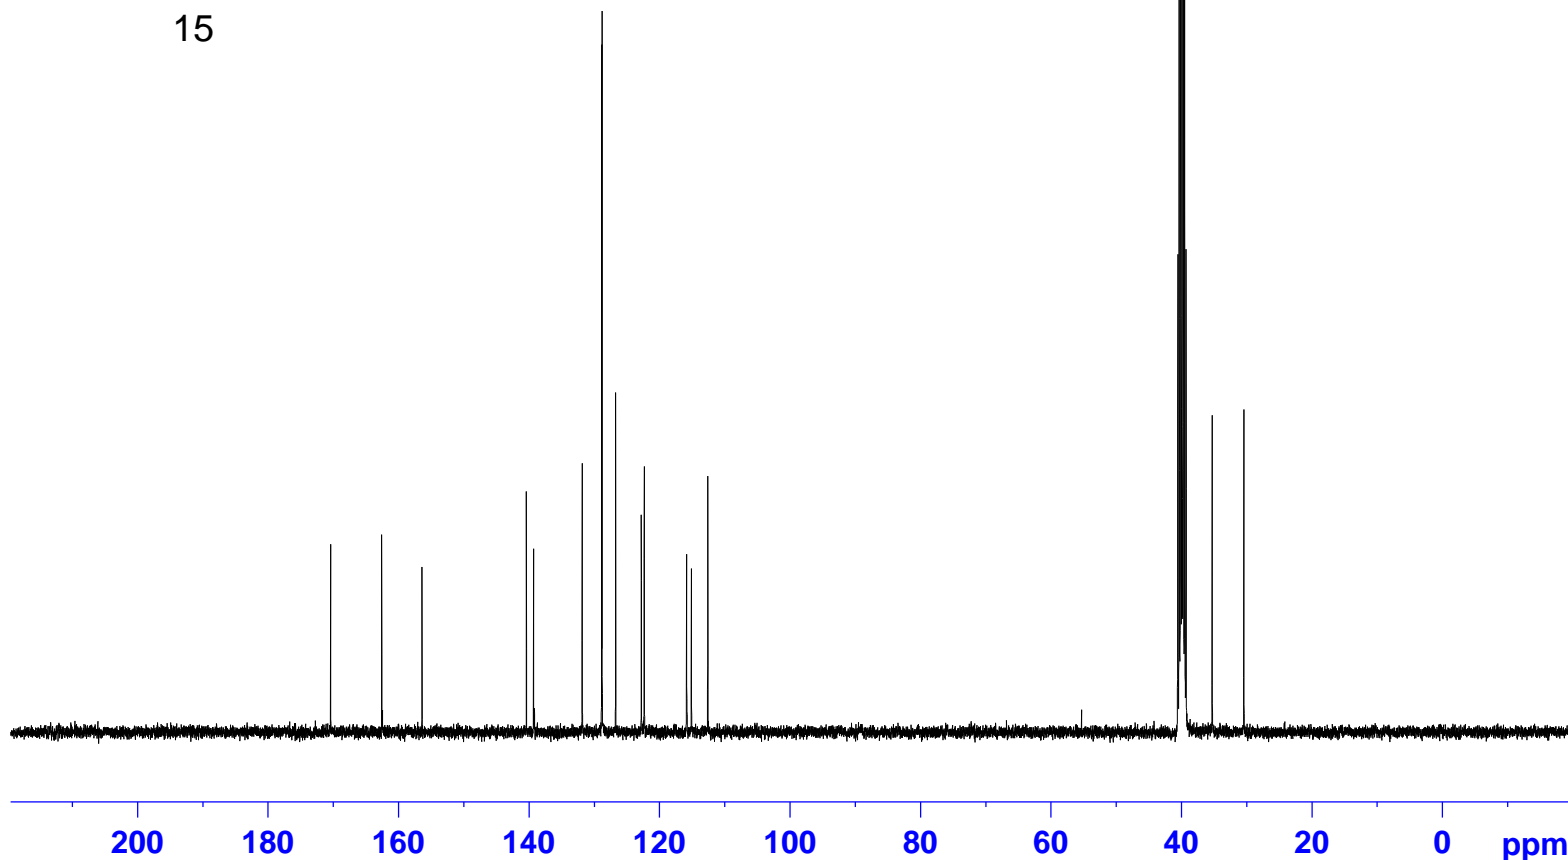

**Spectrum Graph**

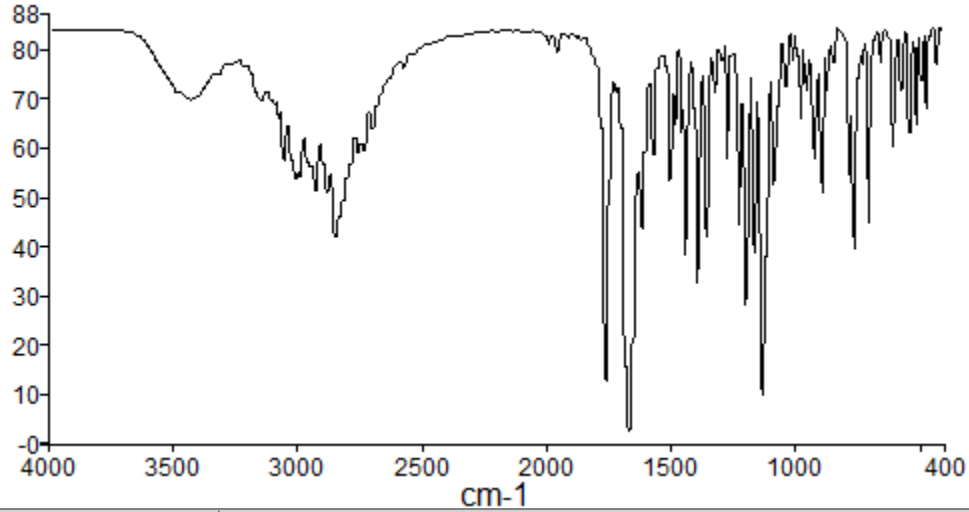

| 名称               | 说明 |
|------------------|----|
| S20121127-053-S2 |    |

**Search Result  
Peak Table Results**

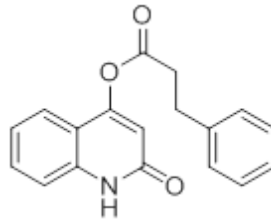

15

| 频谱名              |
|------------------|
| S20121127-015-S2 |

| 峰值名 | X      | Y     |
|-----|--------|-------|
| 55  | 423.95 | 77.58 |
| 54  | 463.46 | 68.5  |
| 53  | 484.6  | 74.36 |
| 52  | 509.73 | 65.35 |
| 51  | 532.47 | 63.47 |
| 50  | 565.37 | 72.16 |
| 49  | 599.73 | 60.77 |
| 48  | 651.83 | 77.84 |
| 47  | 687.68 | 71.39 |
| 46  | 700.82 | 44.83 |
| 45  | 750.03 | 39.56 |
| 44  | 758.73 | 46.84 |
| 43  | 769.77 | 47.61 |
| 42  | 836.97 | 77.8  |
| 41  | 866.2  | 72.38 |
| 40  | 884.16 | 51.61 |
| 39  | 913.34 | 58.28 |
| 38  | 944.48 | 72.15 |
| 37  | 956.59 | 75.57 |

|          |         |       |
|----------|---------|-------|
| 36       | 976.72  | 66.61 |
| 35       | 1002.31 | 78.49 |
| 34       | 1031.74 | 72.87 |
| 33       | 1067.93 | 54.13 |
| 32       | 1080.93 | 52.93 |
| 酚羟基C-O31 | 1125.47 | 9.78  |
| 30       | 1143.96 | 60.19 |
| 29       | 1158.29 | 38.9  |
| 28       | 1194.87 | 28.11 |
| 27       | 1216.48 | 44.64 |
| 26       | 1265.95 | 58.53 |
| 25       | 1289.24 | 78.18 |
| 24       | 1317.09 | 71.84 |
| 23       | 1350.64 | 41.89 |
| 22       | 1390.23 | 32.64 |
| 21       | 1442.33 | 38.55 |
| 20       | 1456.88 | 63.86 |
| 19       | 1482    | 64.49 |
| 18       | 1495.41 | 59.34 |
| 17       | 1504.38 | 53.49 |
| 16       | 1566.86 | 58.91 |
| 15       | 1609.35 | 43.7  |
| 14       | 1620.34 | 52.02 |
| 13       | 1671.49 | 1.91  |
| 12       | 1760.12 | 12.29 |
| 11       | 1956.83 | 80.11 |
| 10       | 2702.52 | 64.57 |
| 9        | 2738.65 | 59.47 |
| 8        | 2766.41 | 59.26 |
| 7        | 2855.16 | 41.97 |
| 6        | 2889    | 51.36 |
| 5        | 2926.44 | 51.51 |
| 4        | 2943.9  | 53.5  |
| 3        | 3009.96 | 53.82 |
| 2        | 3062.62 | 58.07 |
| 1        | 3435.88 | 70.33 |

S20120919-016

20120919

PROTON NMR DMSO D:  
D:\nmr data ham

11.933  
8.015  
7.975  
7.883  
7.879  
7.870  
7.860  
7.670  
7.650  
7.594  
7.576  
7.508  
7.504  
7.495  
7.492  
7.408  
7.387  
7.254  
7.234  
7.216  
7.055  
7.015  
6.527  
5.759  
3.329  
2.510  
2.505  
2.501

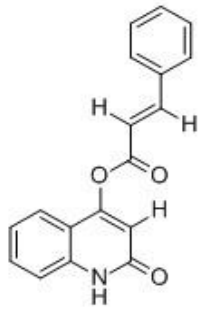

16

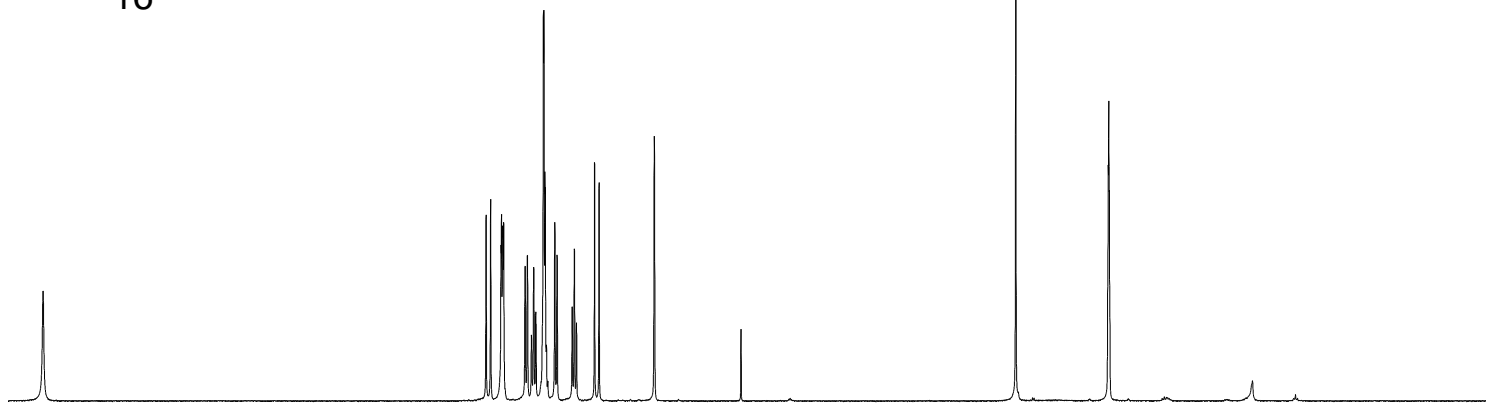

12 11 10 9 8 7 6 5 4 3 2 1 0 ppm

0.94  
1.00  
1.96  
1.01  
1.02  
2.94  
0.98  
0.99  
0.98  
0.88



Current Data Parameters  
NAME SYPN-08  
EXPNO 10  
PROCNO 1

F2 - Acquisition Parameters  
Date\_ 20120919  
Time 11.10  
INSTRUM spect  
PROBHD 5 mm PABBO BB-  
PULPROG zg30  
TD 65536  
SOLVENT DMSO  
NS 16  
DS 2  
SWH 8223.685 Hz  
FIDRES 0.125483 Hz  
AQ 3.9846387 sec  
RG 203  
DW 60.800 usec  
DE 6.50 usec  
TE 298.0 K  
D1 1.00000000 sec

==== CHANNEL f1 =====  
NUC1 1H  
P1 14.50 usec  
PLW1 12.85299969 W  
SFO1 400.1324710 MHz

F2 - Processing parameters  
SI 65536  
SF 400.1300000 MHz  
WDW EM  
SSB 0  
LB 0.30 Hz  
GB 0  
PC 1.00

S20121106-067

20121107

C13CPD DMSO D:\nmr\_data ham

164.11  
162.73  
162.62  
156.45  
148.28  
139.43  
134.21  
131.99  
131.70  
129.52  
129.37  
122.82  
122.59  
116.73  
116.04  
115.30  
112.73

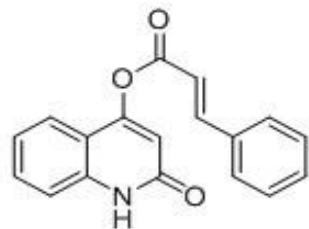

16

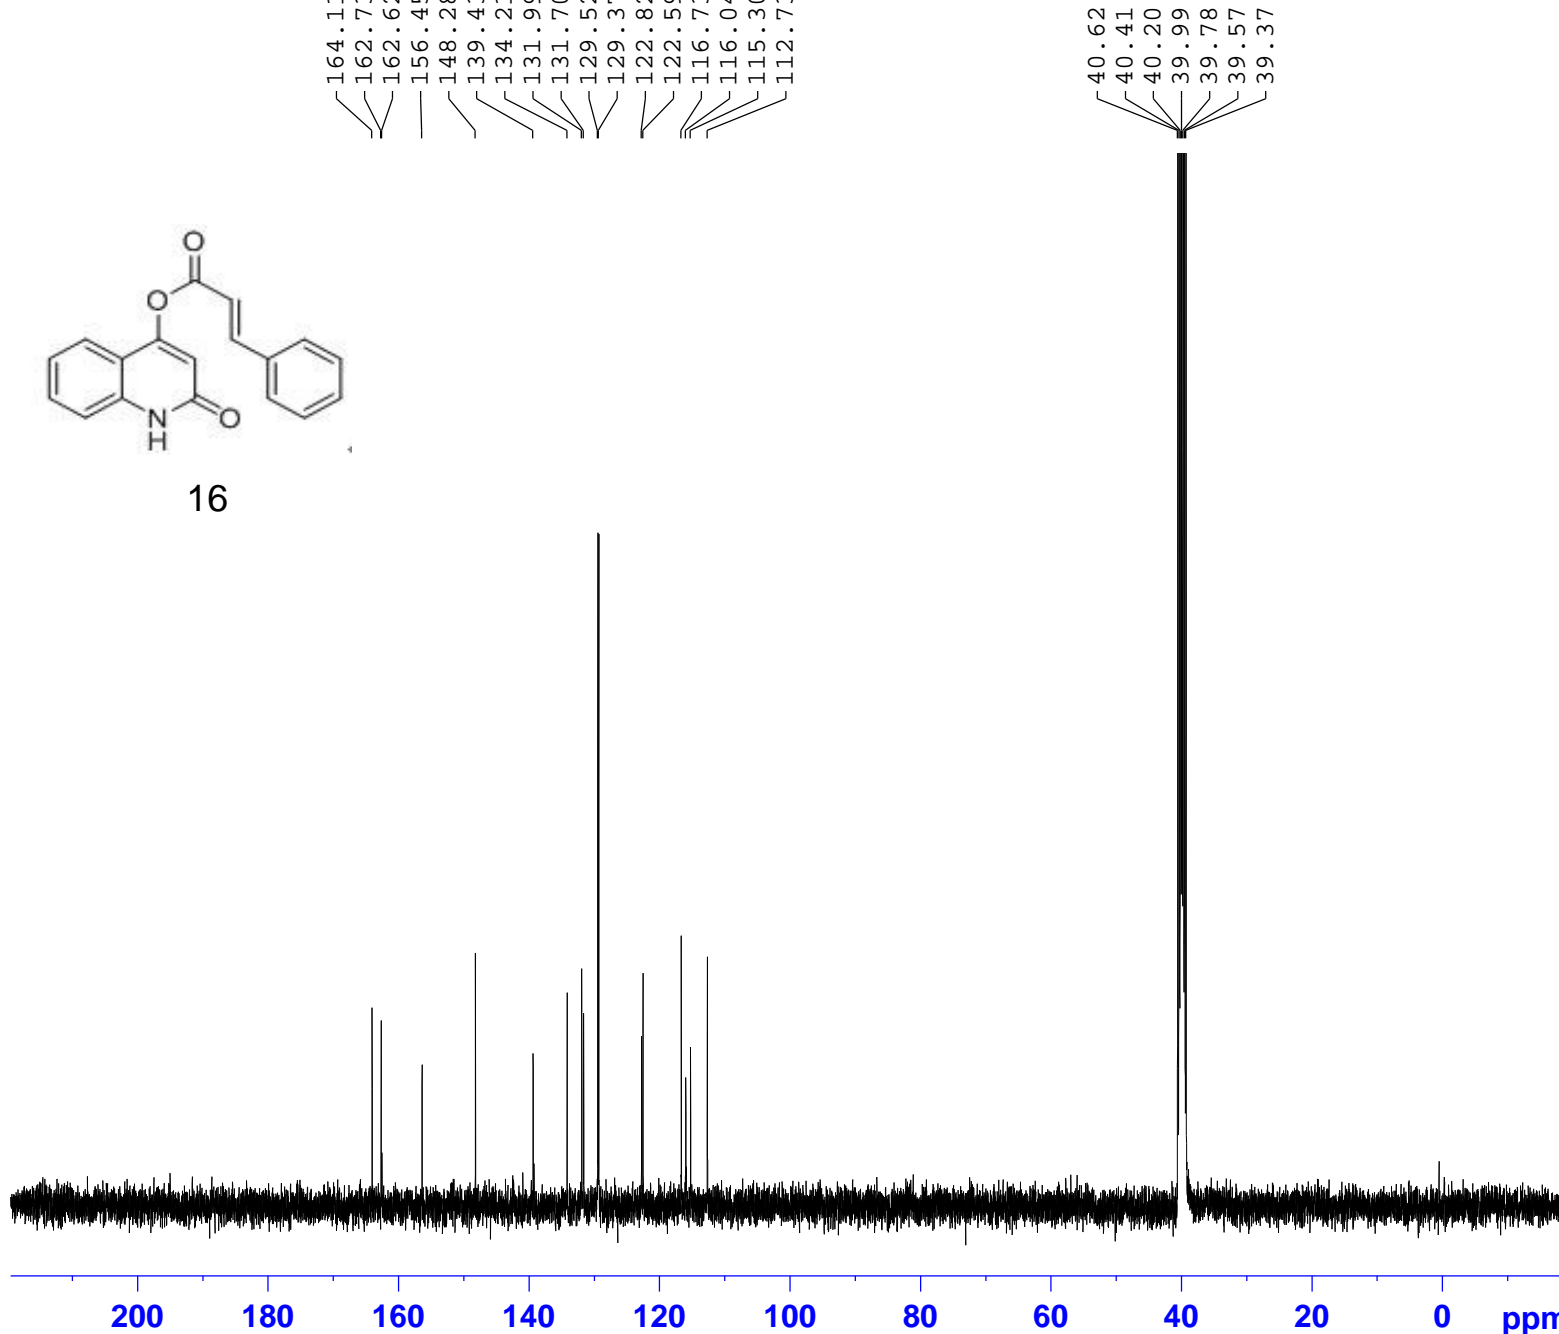

Current Data Parameters  
NAME S4  
EXPNO 10  
PROCNO 1

F2 - Acquisition Parameters  
Date\_ 20121107  
Time 21.08  
INSTRUM spect  
PROBHD 5 mm PABBO BB-  
PULPROG zgpg30  
TD 65536  
SOLVENT DMSO  
NS 1024  
DS 4  
SWH 24038.461 Hz  
FIDRES 0.366798 Hz  
AQ 1.3631988 sec  
RG 203  
DW 20.800 usec  
DE 6.50 usec  
TE 298.1 K  
D1 2.0000000 sec  
D11 0.0300000 sec

==== CHANNEL f1 =====  
NUC1 13C  
P1 9.65 usec  
PLW1 49.65900040 W  
SFO1 100.6228293 MHz

==== CHANNEL f2 =====  
CPDPRG2 waltz16  
NUC2 1H  
PCPD2 90.00 usec  
PLW2 12.85299969 W  
PLW12 0.34196001 W  
PLW13 0.27699000 W  
SFO2 400.1316005 MHz

F2 - Processing parameters  
SI 32768  
SF 100.6127690 MHz  
WDW EM  
SSB 0  
LB 1.00 Hz  
GB 0  
PC 1.40



### Spectrum Graph

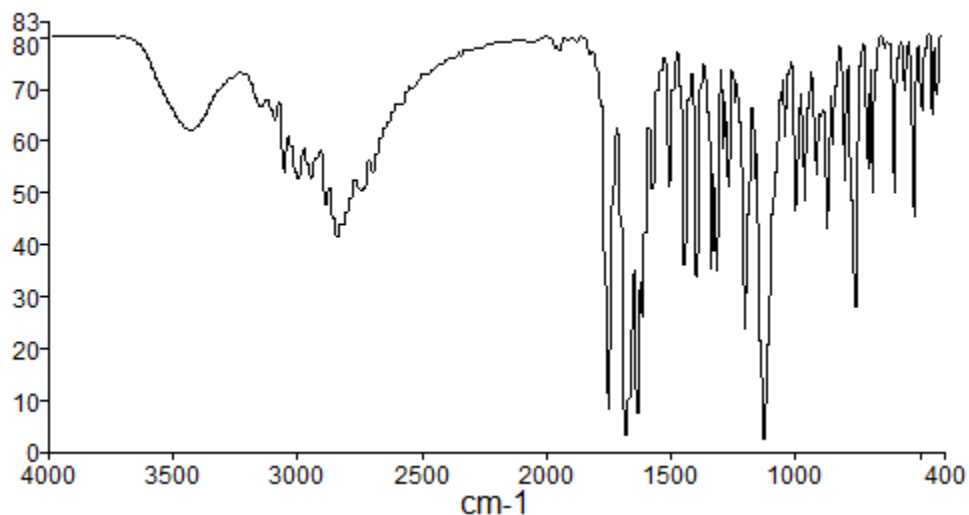

| 名称               | 说明 |
|------------------|----|
| S20121127-055-S4 |    |

### Search Result Peak Table Results

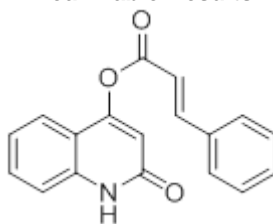

16

| 频谱名              |
|------------------|
| S20121127-017-S4 |

| 峰值名 | X      | Y     |
|-----|--------|-------|
| 55  | 421.29 | 69.61 |
| 54  | 439.08 | 65.5  |
| 53  | 481.73 | 66.49 |
| 52  | 513.07 | 45.63 |
| 51  | 529.04 | 70.76 |
| 50  | 552.54 | 70.11 |
| 49  | 592.2  | 50.13 |
| 48  | 676.77 | 50.16 |
| 47  | 696.54 | 55.33 |
| 46  | 706.18 | 61.9  |
| 45  | 749.88 | 28.28 |
| 44  | 754.76 | 30.4  |
| 43  | 763.84 | 44.48 |
| 42  | 792.04 | 52.9  |
| 41  | 835.31 | 59.75 |
| 40  | 851.95 | 49.45 |
| 39  | 870.02 | 43.05 |
| 38  | 904.74 | 54.1  |
| 37  | 952.31 | 49.14 |

|    |         |       |
|----|---------|-------|
| 36 | 982.4   | 48.99 |
| 35 | 995.9   | 47.11 |
| 34 | 1031.88 | 61.32 |
| 33 | 1077.51 | 47.48 |
| 32 | 1117.66 | 2.26  |
| 31 | 1156.68 | 53.27 |
| 30 | 1195.99 | 23.95 |
| 29 | 1209.75 | 42.19 |
| 28 | 1232.55 | 67.98 |
| 27 | 1262.33 | 51.18 |
| 26 | 1280.72 | 59.1  |
| 25 | 1308.71 | 35.07 |
| 24 | 1333.92 | 35.49 |
| 23 | 1353.47 | 66.61 |
| 22 | 1391.7  | 34.17 |
| 21 | 1441.23 | 36.3  |
| 20 | 1451.12 | 51.08 |
| 19 | 1498.63 | 51.51 |
| 18 | 1507.85 | 60.02 |
| 17 | 1567.78 | 52.1  |
| 16 | 1578.19 | 50.97 |
| 15 | 1610.7  | 26.31 |
| 14 | 1631.13 | 7.54  |
| 13 | 1681.57 | 3.08  |
| 12 | 1754.94 | 8.12  |
| 11 | 1947.36 | 77.91 |
| 10 | 2701.9  | 54.24 |
| 9  | 2740.13 | 50.38 |
| 8  | 2849.11 | 41.53 |
| 7  | 2888.27 | 47.81 |
| 6  | 2950.93 | 53.39 |
| 5  | 3005.37 | 52.71 |
| 4  | 3060.85 | 54.52 |
| 3  | 3100.36 | 64.55 |
| 2  | 3155.74 | 66.89 |
| 1  | 3436.17 | 62.43 |

S20120919-009

20120919

PROTON DMSO D:\nmr\_data ham

— 12.006

7.801  
7.782  
7.627  
7.514  
7.496  
7.474  
7.471  
7.452  
7.415  
7.395  
7.366  
7.288  
6.743

— 3.326

2.510

2.505

2.501

— 1.238

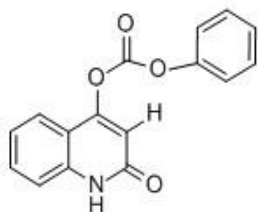

17

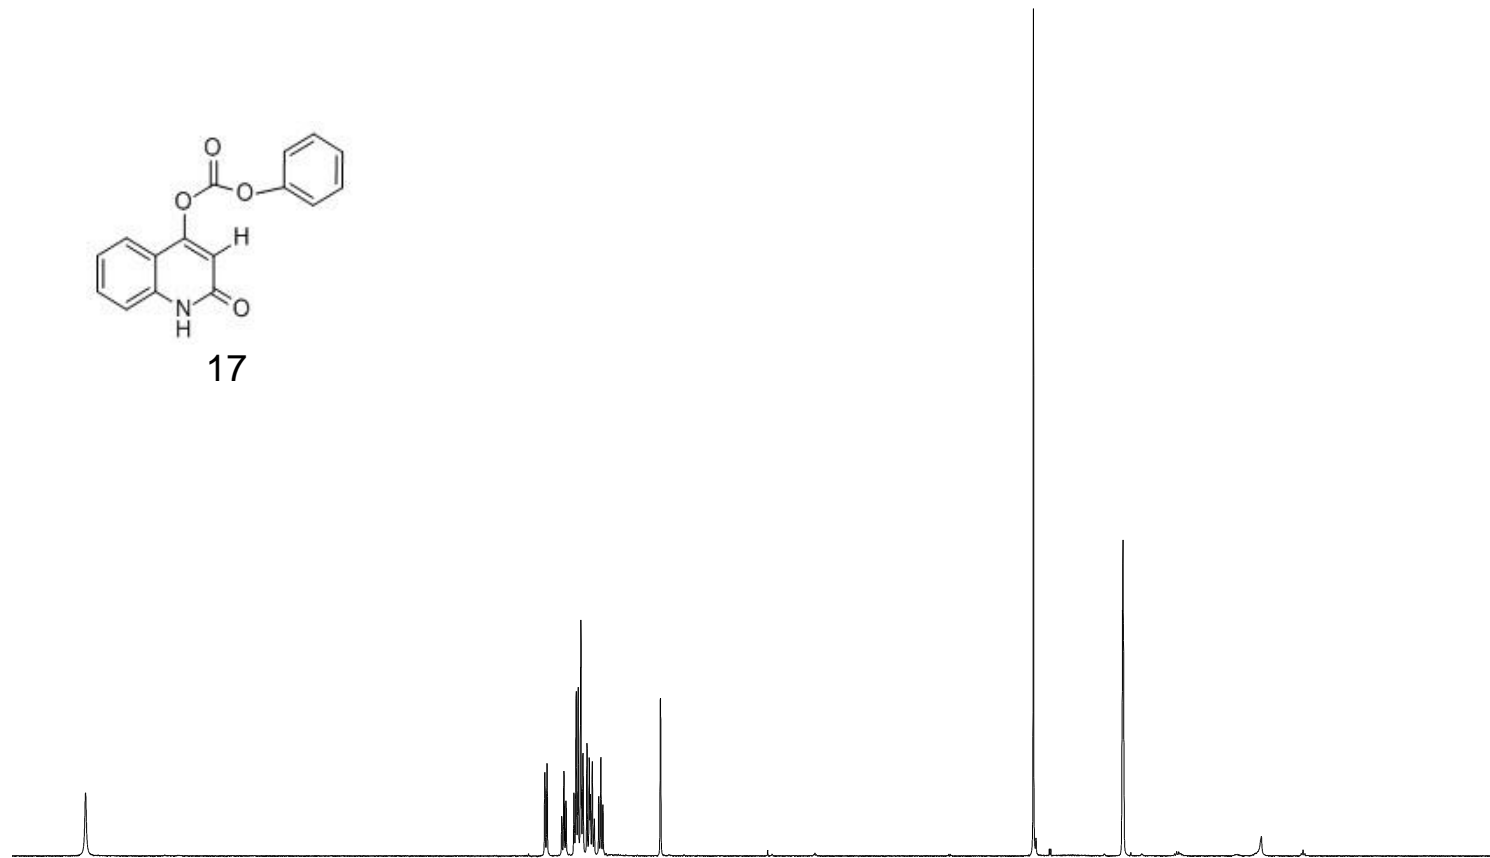

0.95

1.00  
1.03  
2.04  
2.03  
2.07  
1.07  
0.90

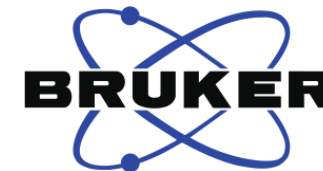

Current Data Parameters  
NAME SYPN-01  
EXPNO 10  
PROCNO 1

F2 - Acquisition Parameters  
Date\_ 20120919  
Time 10.44  
INSTRUM spect  
PROBHD 5 mm PABBO BB-  
PULPROG zg30  
TD 65536  
SOLVENT DMSO  
NS 16  
DS 2  
SWH 8223.685 Hz  
FIDRES 0.125483 Hz  
AQ 3.9846387 sec  
RG 203  
DW 60.800 usec  
DE 6.50 usec  
TE 298.0 K  
D1 1.00000000 sec

==== CHANNEL f1 =====  
NUC1 1H  
P1 14.50 usec  
PLW1 12.85299969 W  
SFO1 400.1324710 MHz

F2 - Processing parameters  
SI 65536  
SF 400.1300000 MHz  
WDW EM  
SSB 0  
LB 0.30 Hz  
GB 0  
PC 1.00

S20121106-076

20121108

C13CPD DMSO D:\nmr\_data ham

162.58  
156.01  
151.03  
150.44  
139.43  
132.26  
130.27  
127.27  
122.79  
122.52  
121.72  
116.09  
114.56  
112.29

40.62  
40.41  
40.20  
39.99  
39.78  
39.57  
39.36

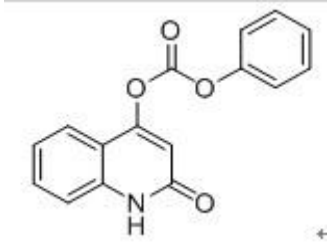

17

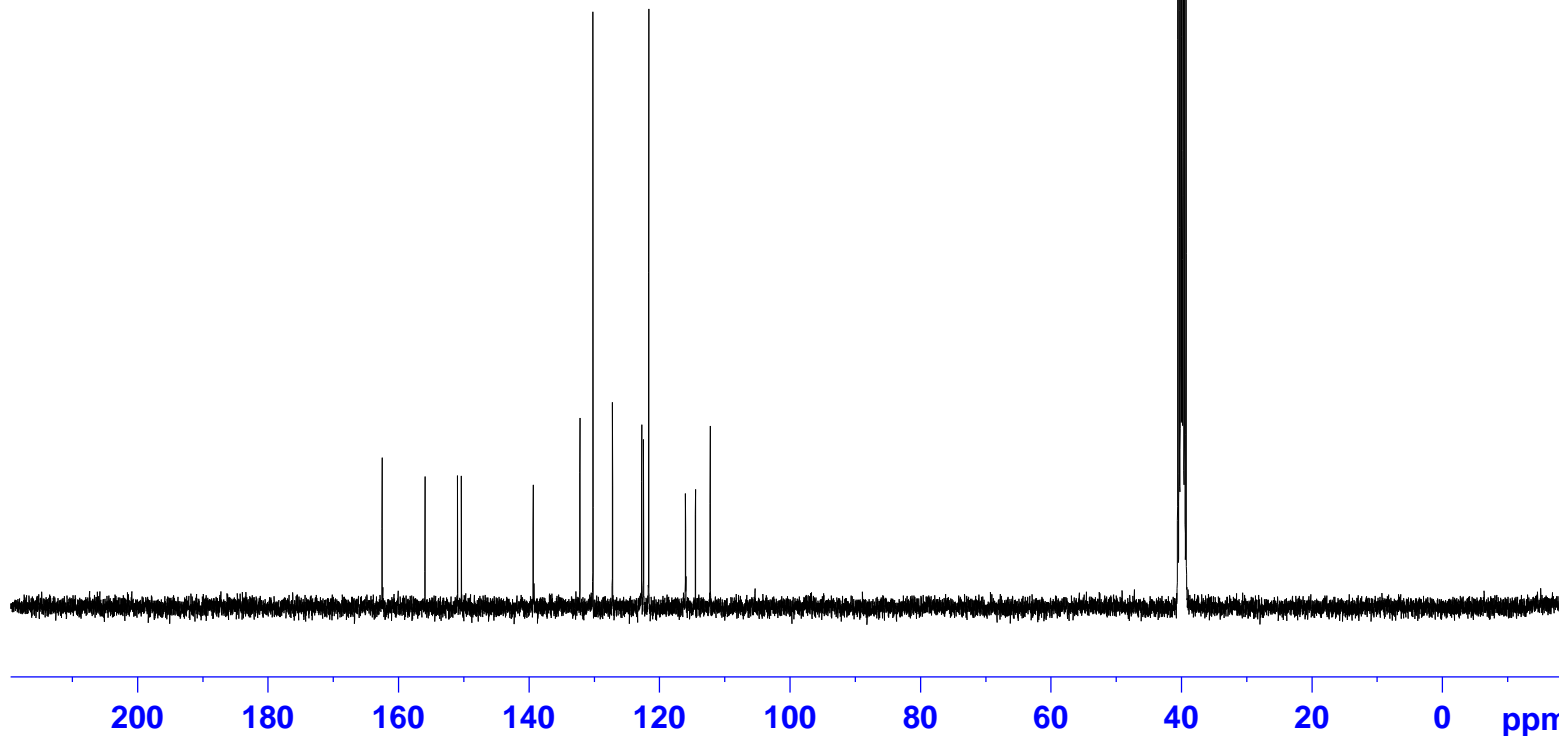

Current Data Parameters  
NAME S-16  
EXPNO 10  
PROCNO 1

F2 - Acquisition Parameters  
Date\_ 20121109  
Time 0.04  
INSTRUM spect  
PROBHD 5 mm PABBO BB-  
PULPROG zgpg30  
TD 65536  
SOLVENT DMSO  
NS 1024  
DS 4  
SWH 24038.461 Hz  
FIDRES 0.366798 Hz  
AQ 1.3631988 sec  
RG 203  
DW 20.800 usec  
DE 6.50 usec  
TE 298.0 K  
D1 2.0000000 sec  
D11 0.0300000 sec

==== CHANNEL f1 =====  
NUC1 13C  
P1 9.65 usec  
PLW1 49.65900040 W  
SFO1 100.6228293 MHz

==== CHANNEL f2 =====  
CPDPRG2 waltz16  
NUC2 1H  
PCPD2 90.00 usec  
PLW2 12.85299969 W  
PLW12 0.34196001 W  
PLW13 0.27699000 W  
SFO2 400.1316005 MHz

F2 - Processing parameters  
SI 32768  
SF 100.6127690 MHz  
WDW EM  
SSB 0  
LB 1.00 Hz  
GB 0  
PC 1.40

Spectrum Graph

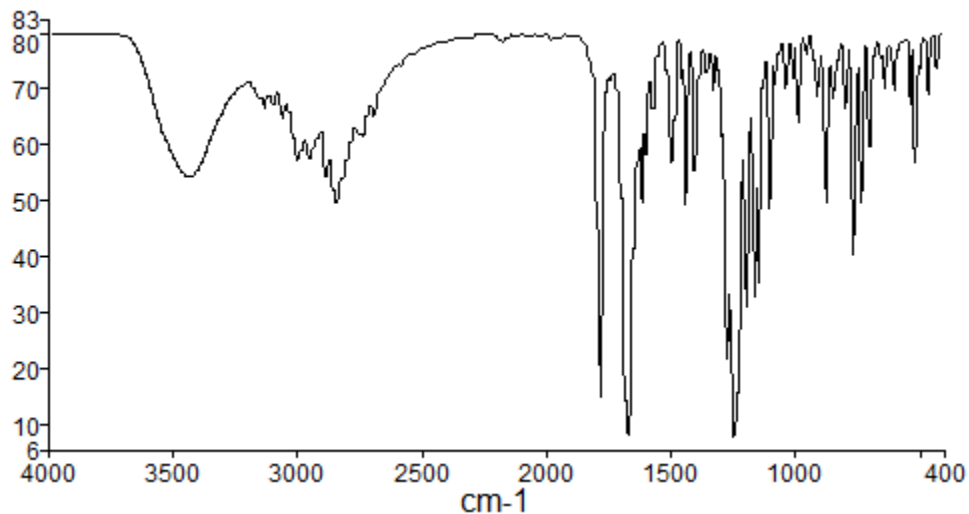

| 名称                | 说明 |
|-------------------|----|
| S20121127-066-S16 |    |

Search Result  
Peak Table Results

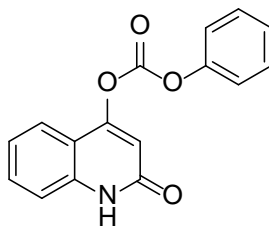

17

| 频谱名               |
|-------------------|
| S20121127-066-S16 |

| 峰值名 | X      | Y     |
|-----|--------|-------|
| 50  | 422    | 74.21 |
| 49  | 457.25 | 69.54 |
| 48  | 497.31 | 68.69 |
| 47  | 509.93 | 57.04 |
| 46  | 527.61 | 67.68 |
| 45  | 586.7  | 70.24 |
| 44  | 636.21 | 70.57 |
| 43  | 683.28 | 59.99 |
| 42  | 693.63 | 60    |

|    |         |       |
|----|---------|-------|
| 41 | 727.04  | 49.91 |
| 40 | 748.49  | 45.93 |
| 39 | 756.19  | 45.96 |
| 38 | 765.25  | 40.39 |
| 37 | 791.18  | 67.1  |
| 36 | 841.09  | 68.61 |
| 35 | 867.16  | 50.26 |
| 34 | 912.44  | 68.94 |
| 33 | 948.2   | 76.61 |
| 32 | 975.11  | 64.57 |
| 31 | 987.04  | 66.98 |
| 30 | 1006.2  | 72.23 |
| 29 | 1023.29 | 71.88 |
| 28 | 1034.6  | 70.64 |
| 27 | 1070.63 | 71.09 |
| 26 | 1097.65 | 49.26 |
| 25 | 1141.07 | 35.47 |
| 24 | 1151.77 | 33.04 |
| 23 | 1187.84 | 31.14 |
| 22 | 1230.61 | 9.18  |
| 21 | 1242.85 | 7.48  |
| 20 | 1268.16 | 22.01 |
| 19 | 1324.91 | 70.35 |
| 18 | 1353.66 | 73.43 |
| 17 | 1401.75 | 55.62 |
| 16 | 1439.03 | 49.56 |
| 15 | 1456.2  | 72.41 |
| 14 | 1485.6  | 56.97 |
| 13 | 1569.21 | 67.11 |
| 12 | 1591.77 | 58.26 |
| 11 | 1611.41 | 49.78 |
| 10 | 1671.5  | 7.9   |
| 9  | 1784.2  | 14.6  |
| 8  | 2700.99 | 65.44 |
| 7  | 2852.32 | 49.68 |
| 6  | 2889.56 | 54.39 |
| 5  | 2950.68 | 57.8  |
| 4  | 3007.92 | 57.67 |
| 3  | 3061.97 | 65.06 |
| 2  | 3137.91 | 66.8  |
| 1  | 3443.77 | 54.61 |

S20120925-057

20120925

PROTON DMSO D4 \nmr\_data ham

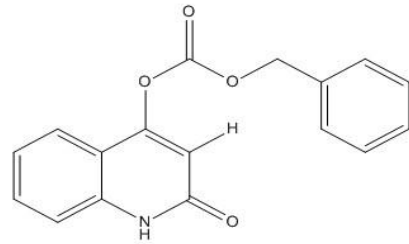

18

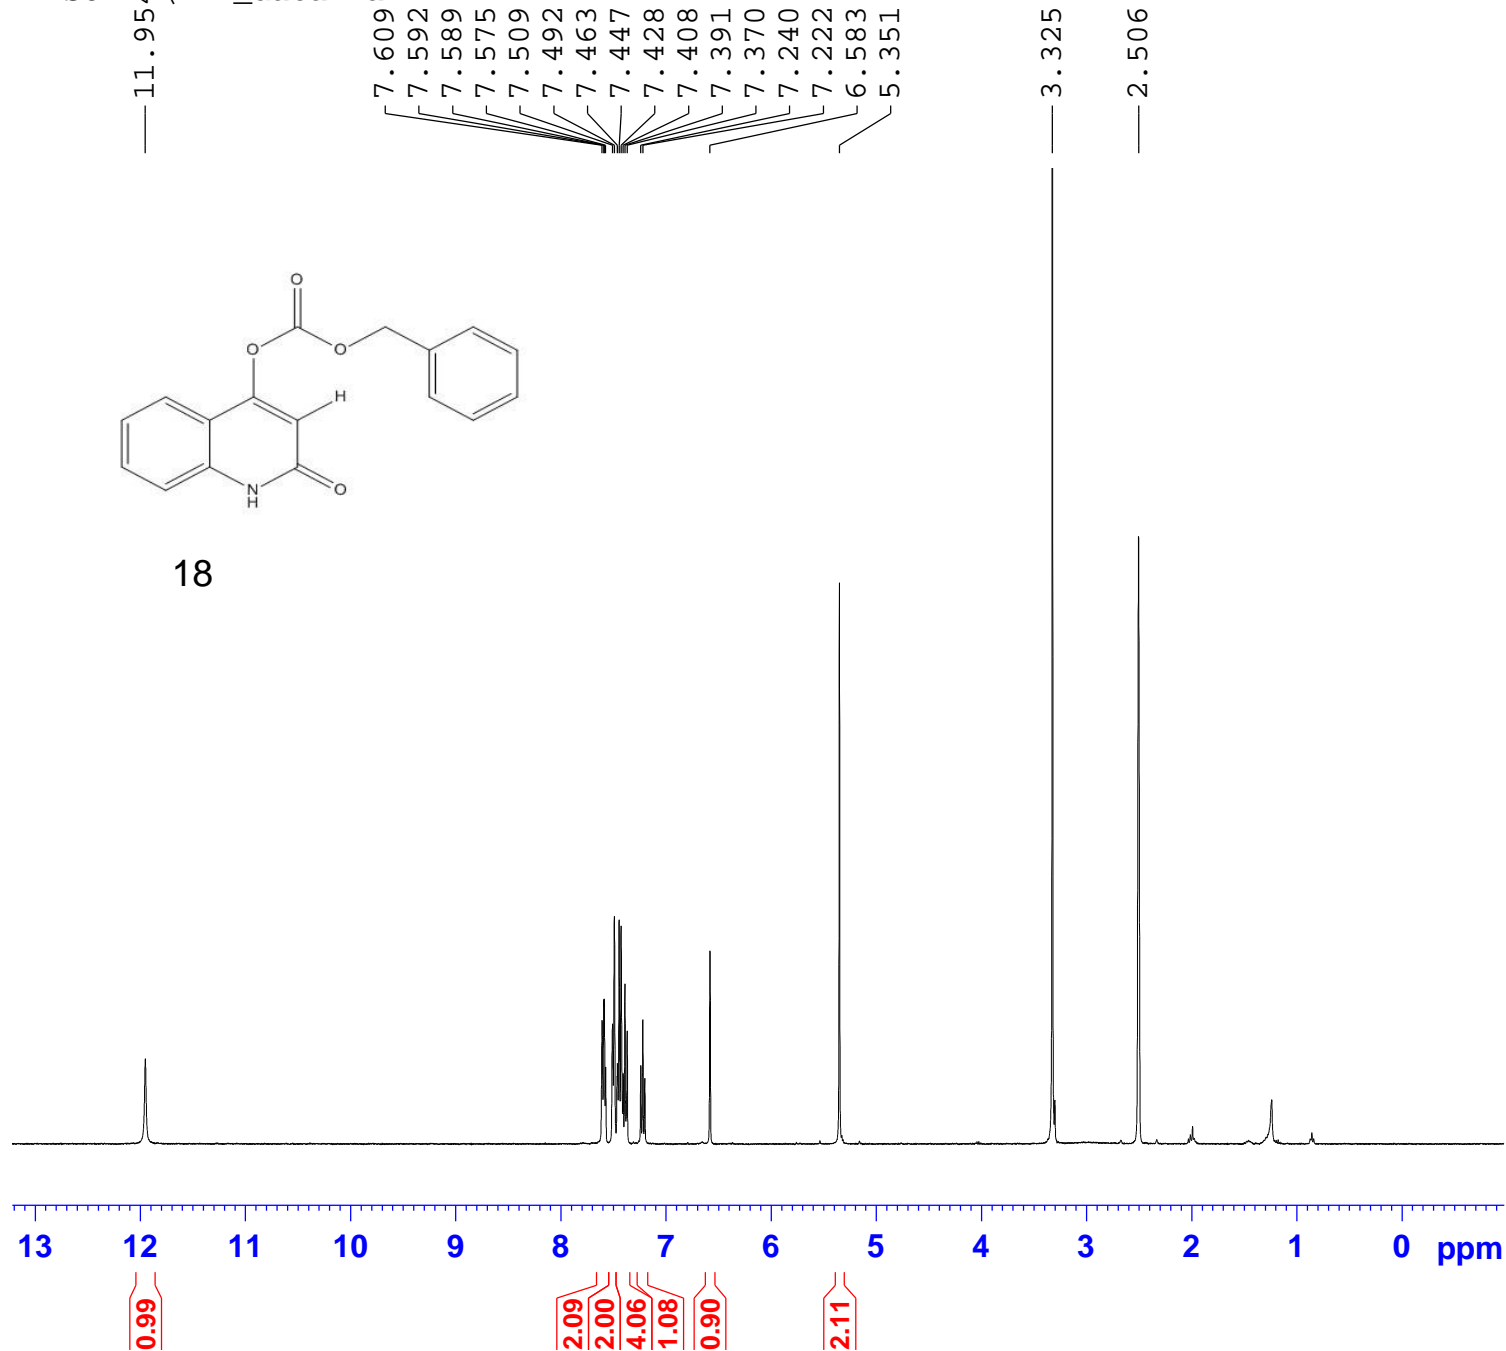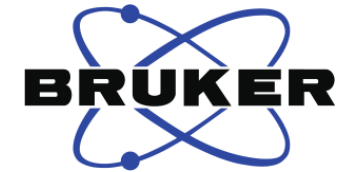

Current Data Parameters  
NAME SYP-N-11  
EXPNO 10  
PROCNO 1

F2 - Acquisition Parameters  
Date\_ 20120925  
Time 17.43  
INSTRUM spect  
PROBHD 5 mm PABBO BB-  
PULPROG zg30  
TD 65536  
SOLVENT DMSO  
NS 16  
DS 2  
SWH 8223.685 Hz  
FIDRES 0.125483 Hz  
AQ 3.9846387 sec  
RG 203  
DW 60.800 usec  
DE 6.50 usec  
TE 298.1 K  
D1 1.00000000 sec

==== CHANNEL f1 =====  
NUC1 1H  
P1 14.50 usec  
PLW1 12.85299969 W  
SFO1 400.1324710 MHz

F2 - Processing parameters  
SI 65536  
SF 400.1300000 MHz  
WDB EM  
SSB 0  
LB 0.30 Hz  
GB 0  
PC 1.00

S20121106-080

20121108

C13CPD DMSO D:\nmr\_data ham

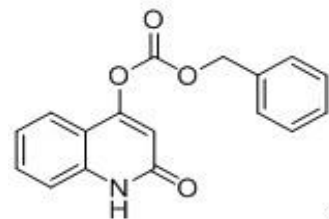

18

173.14  
169.39  
163.94  
162.79  
162.63  
156.37  
139.68  
139.40  
135.48  
133.96  
131.98  
131.26  
130.17  
129.82  
129.01  
128.69  
127.71  
127.03  
123.09  
122.66  
122.45  
121.44  
116.00  
115.54  
115.18  
112.68  
98.75

55.37  
41.14  
40.61  
40.50  
40.40  
40.20  
39.99  
39.78  
39.57  
39.36

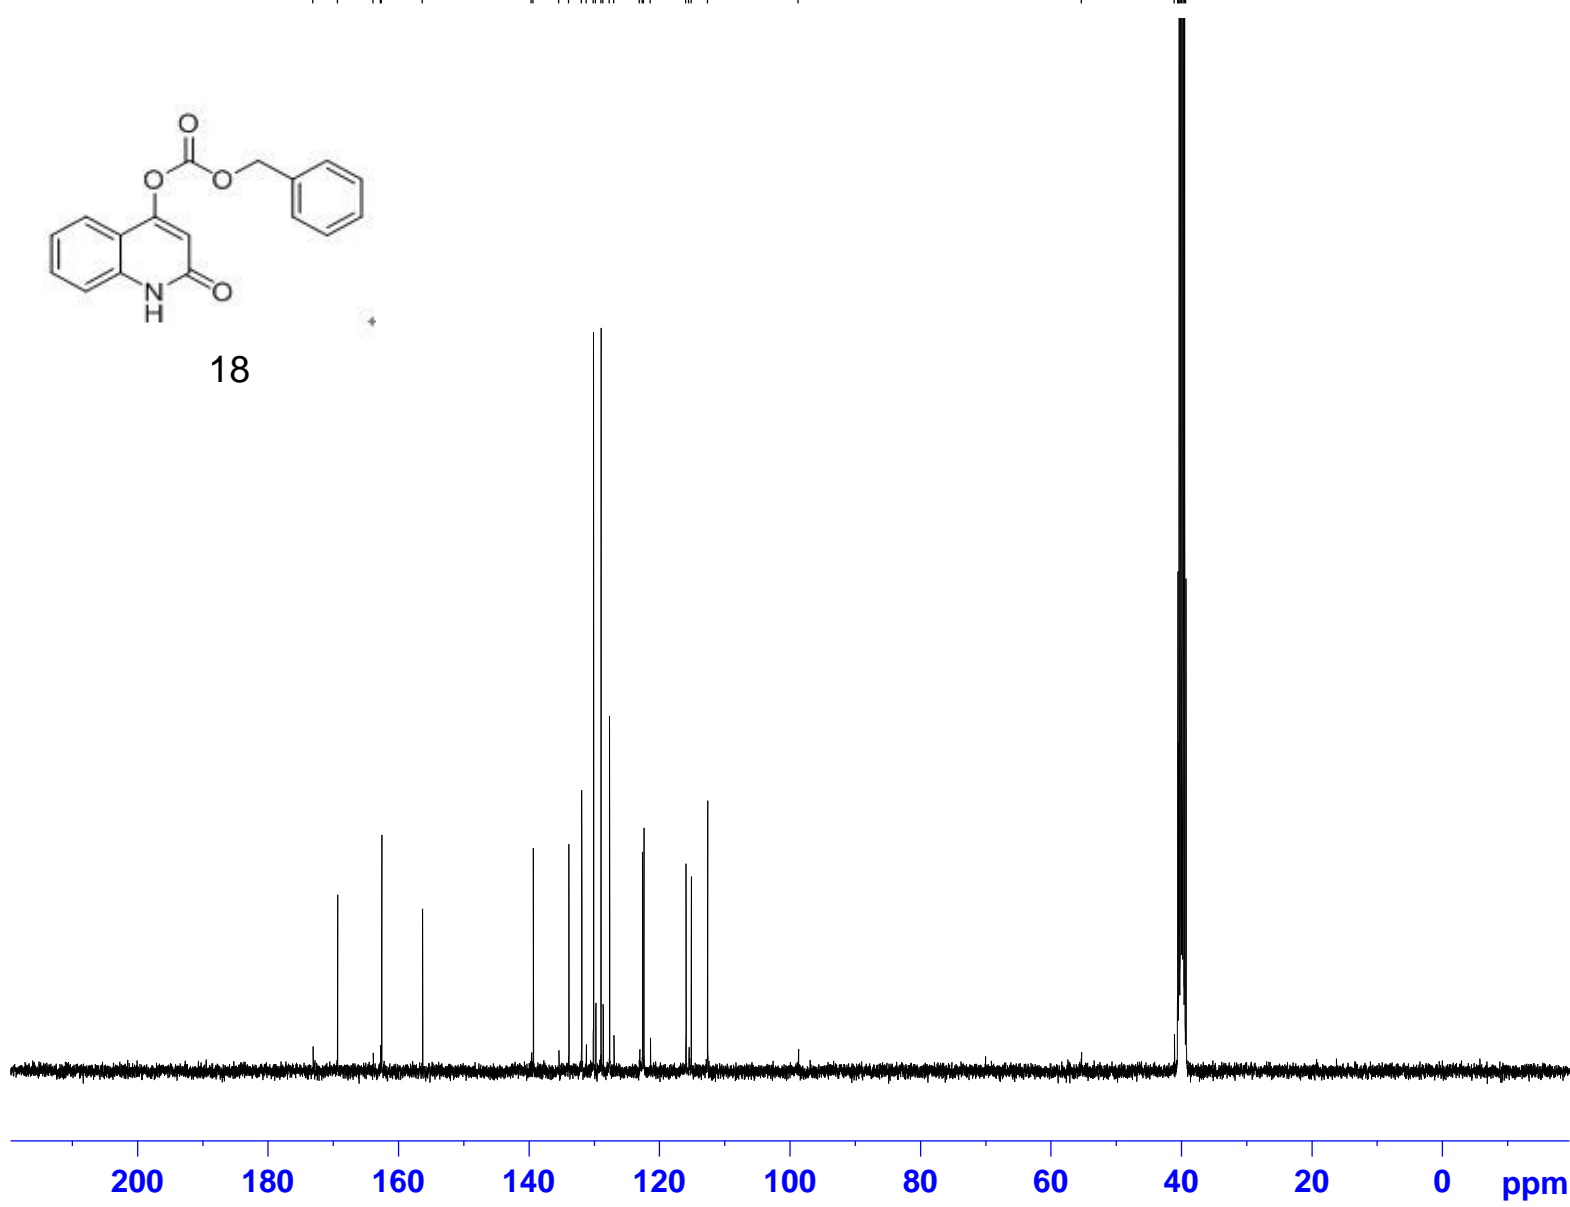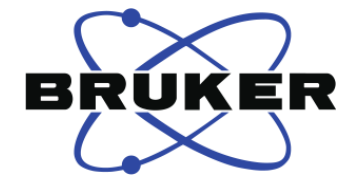

Current Data Parameters  
NAME S-12  
EXPNO 10  
PROCNO 1

F2 - Acquisition Parameters  
Date\_ 20121108  
Time 20.00  
INSTRUM spect  
PROBHD 5 mm PABBO BB-  
PULPROG zgpg30  
TD 65536  
SOLVENT DMSO  
NS 1024  
DS 4  
SWH 24038.461 Hz  
FIDRES 0.366798 Hz  
AQ 1.3631988 sec  
RG 203  
DW 20.800 usec  
DE 6.50 usec  
TE 298.0 K  
D1 2.0000000 sec  
D11 0.0300000 sec

==== CHANNEL f1 =====  
NUC1 13C  
P1 9.65 usec  
PLW1 49.65900040 W  
SFO1 100.6228293 MHz

==== CHANNEL f2 =====  
CPDPRG2 waltz16  
NUC2 1H  
PCPD2 90.00 usec  
PLW2 12.85299969 W  
PLW12 0.34196001 W  
PLW13 0.27699000 W  
SFO2 400.1316005 MHz

F2 - Processing parameters  
SI 32768  
SF 100.6127690 MHz  
WDW EM  
SSB 0  
LB 1.00 Hz  
GB 0  
PC 1.40



### Spectrum Graph

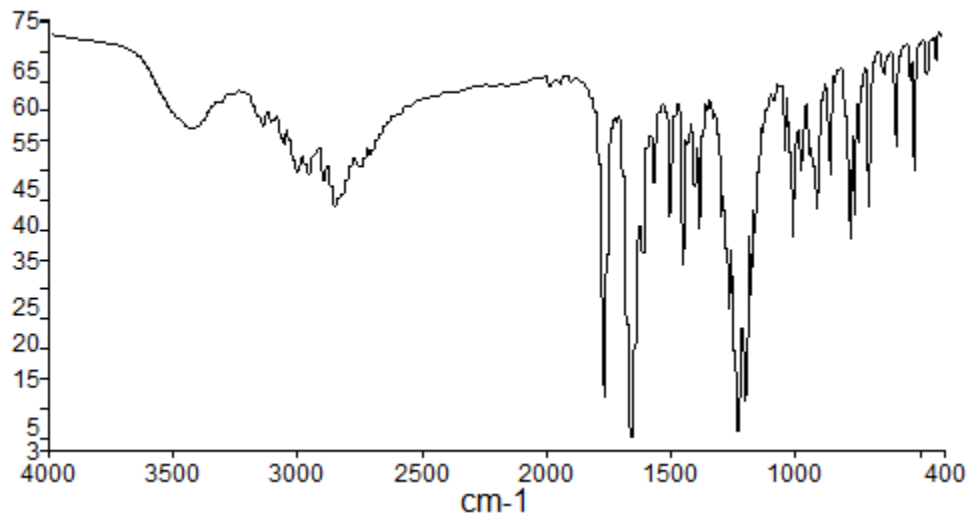

| 名称                | 说明 |
|-------------------|----|
| S20121127-062-S12 |    |

### Search Result Peak Table Results

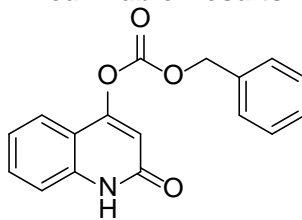

18

| 频谱名               |
|-------------------|
| S20121127-062-S12 |

| 峰值名 | X      | Y     |
|-----|--------|-------|
| 46  | 421.6  | 68.83 |
| 45  | 463.51 | 66.46 |
| 44  | 516.95 | 50.07 |
| 43  | 530.95 | 65.66 |
| 42  | 583.47 | 54.58 |
| 41  | 634.41 | 66.67 |
| 40  | 697.38 | 43.81 |
| 39  | 738.18 | 55.16 |
| 38  | 757.91 | 42.55 |
| 37  | 769.77 | 38.57 |

|    |         |       |
|----|---------|-------|
| 36 | 785.14  | 51.15 |
| 35 | 827.82  | 65.22 |
| 34 | 850.58  | 49.69 |
| 33 | 865.1   | 54.72 |
| 32 | 905.58  | 43.87 |
| 31 | 932.39  | 51.43 |
| 30 | 970.32  | 50.35 |
| 29 | 987.62  | 53.5  |
| 28 | 1007.8  | 38.81 |
| 27 | 1034.76 | 53.82 |
| 26 | 1152.35 | 39.68 |
| 25 | 1170.67 | 29.04 |
| 24 | 1194.5  | 11.32 |
| 23 | 1225.88 | 5.88  |
| 22 | 1264.96 | 26.67 |
| 21 | 1286.99 | 41.98 |
| 20 | 1353.14 | 60.27 |
| 19 | 1375.32 | 40.35 |
| 18 | 1399.95 | 47.47 |
| 17 | 1422.86 | 54.92 |
| 16 | 1445.05 | 34.35 |
| 15 | 1504.49 | 42.2  |
| 14 | 1567.84 | 48.1  |
| 13 | 1609.82 | 36.24 |
| 12 | 1654.13 | 4.73  |
| 11 | 1761.7  | 11.73 |
| 10 | 1987.59 | 64.5  |
| 9  | 2712.19 | 52.57 |
| 8  | 2747.19 | 50.6  |
| 7  | 2854.01 | 44.24 |
| 6  | 2897.13 | 48.47 |
| 5  | 2956.37 | 49.6  |
| 4  | 3008.49 | 50.12 |
| 3  | 3067.11 | 54.89 |
| 2  | 3145.73 | 57.92 |
| 1  | 3434.98 | 57.34 |

S20120925-062

20120925

PROTON DMSO D:\nmr\_data ham



Current Data Parameters  
NAME SYP-N-16  
EXPNO 10  
PROCNO 1

F2 - Acquisition Parameters  
Date\_ 20120925  
Time 18.01  
INSTRUM spect  
PROBHD 5 mm PABBO BB-  
PULPROG zg30  
TD 65536  
SOLVENT DMSO  
NS 16  
DS 2  
SWH 8223.685 Hz  
FIDRES 0.125483 Hz  
AQ 3.9846387 sec  
RG 203  
DW 60.800 usec  
DE 6.50 usec  
TE 298.0 K  
D1 1.00000000 sec

===== CHANNEL f1 =====  
NUC1 1H  
P1 14.50 usec  
PLW1 12.85299969 W  
SFO1 400.1324710 MHz

F2 - Processing parameters  
SI 65536  
SF 400.1300000 MHz  
WDW EM  
SSB 0  
LB 0.30 Hz  
GB 0  
PC 1.00

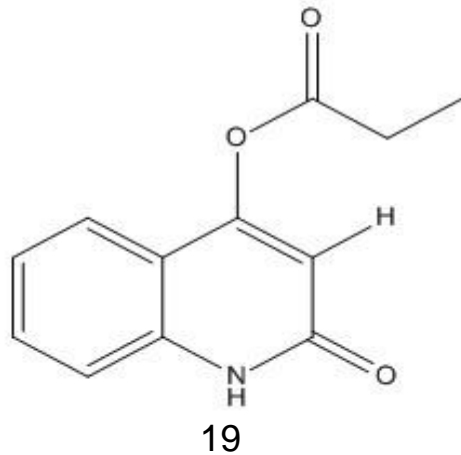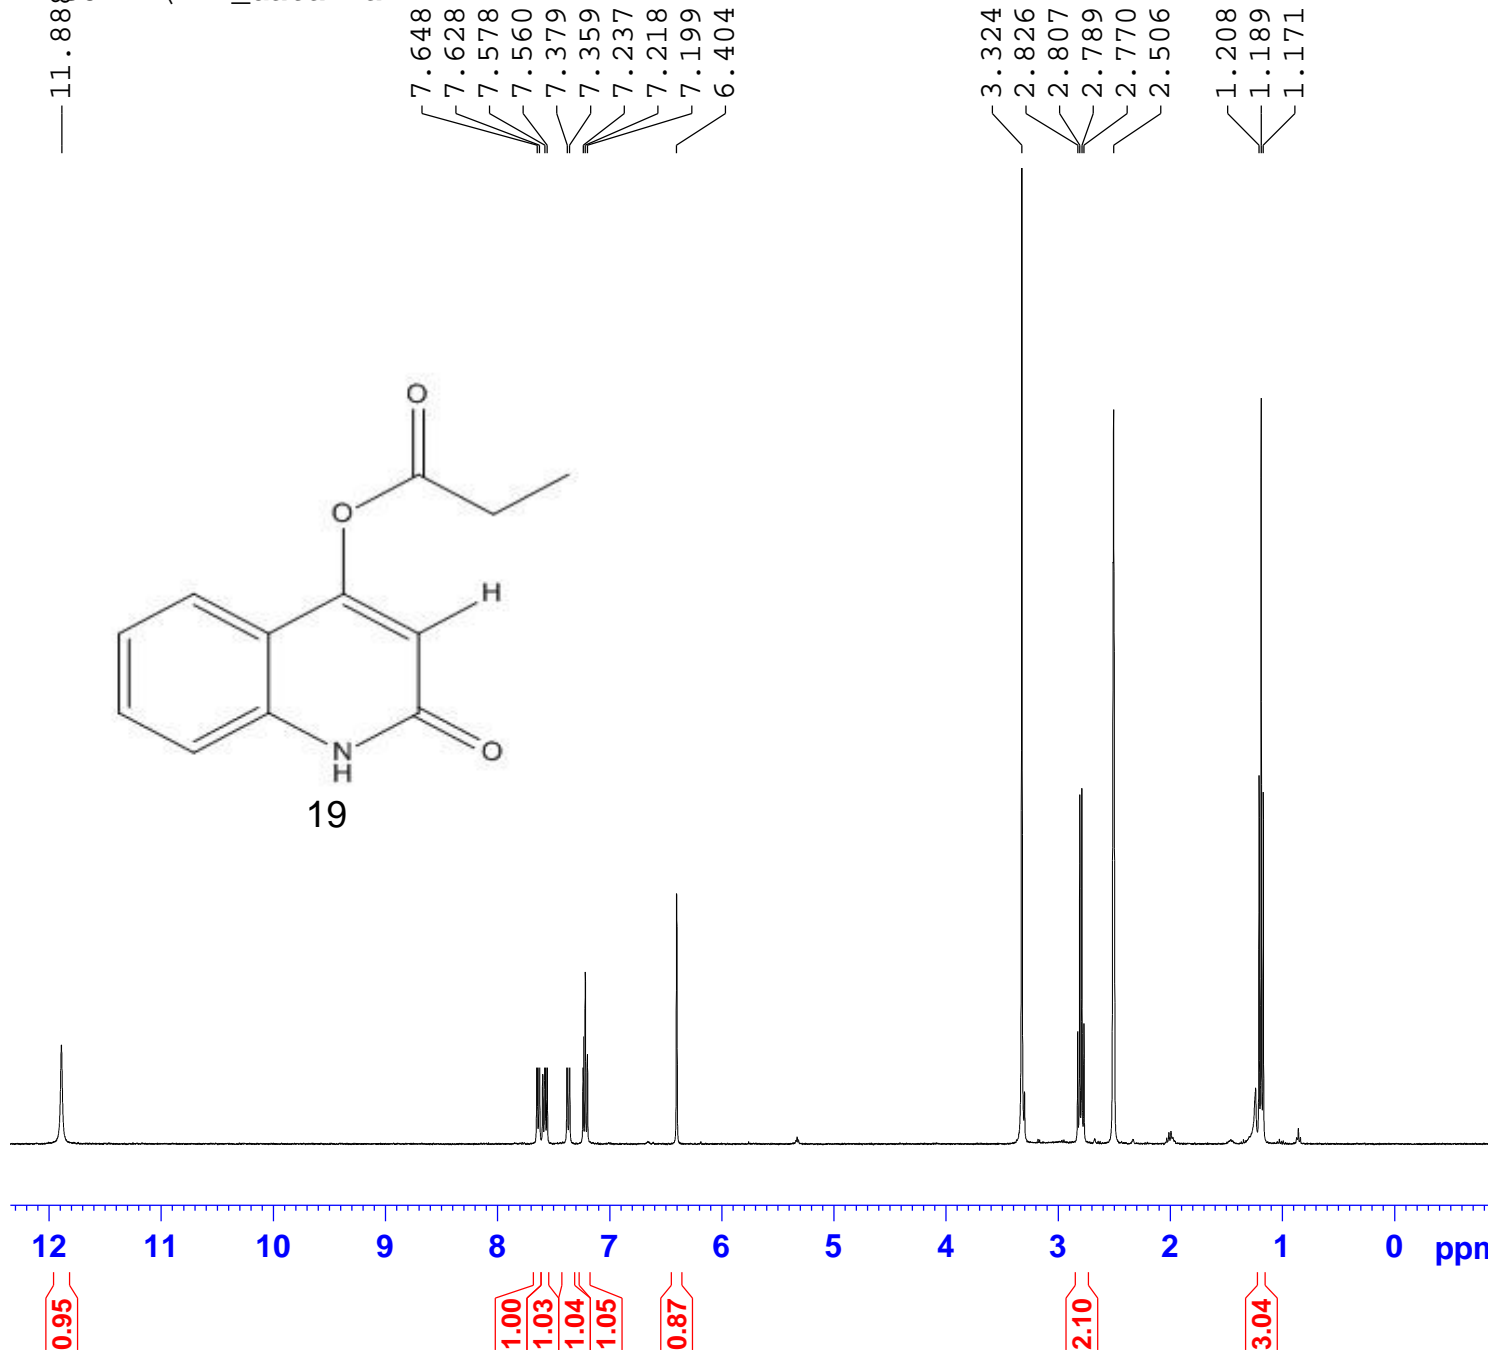

S20121106-075

20121108

C13CPD DMSO D:\nmr\_data ham

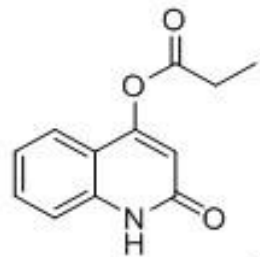

19

— 171.90  
— 162.72  
— 156.52  
  
— 139.39  
— 131.93  
— 122.87  
— 122.49  
— 115.96  
— 115.34  
— 112.70

40.61  
40.40  
40.20  
39.99  
39.78  
39.57  
39.36  
27.34

— 9.16

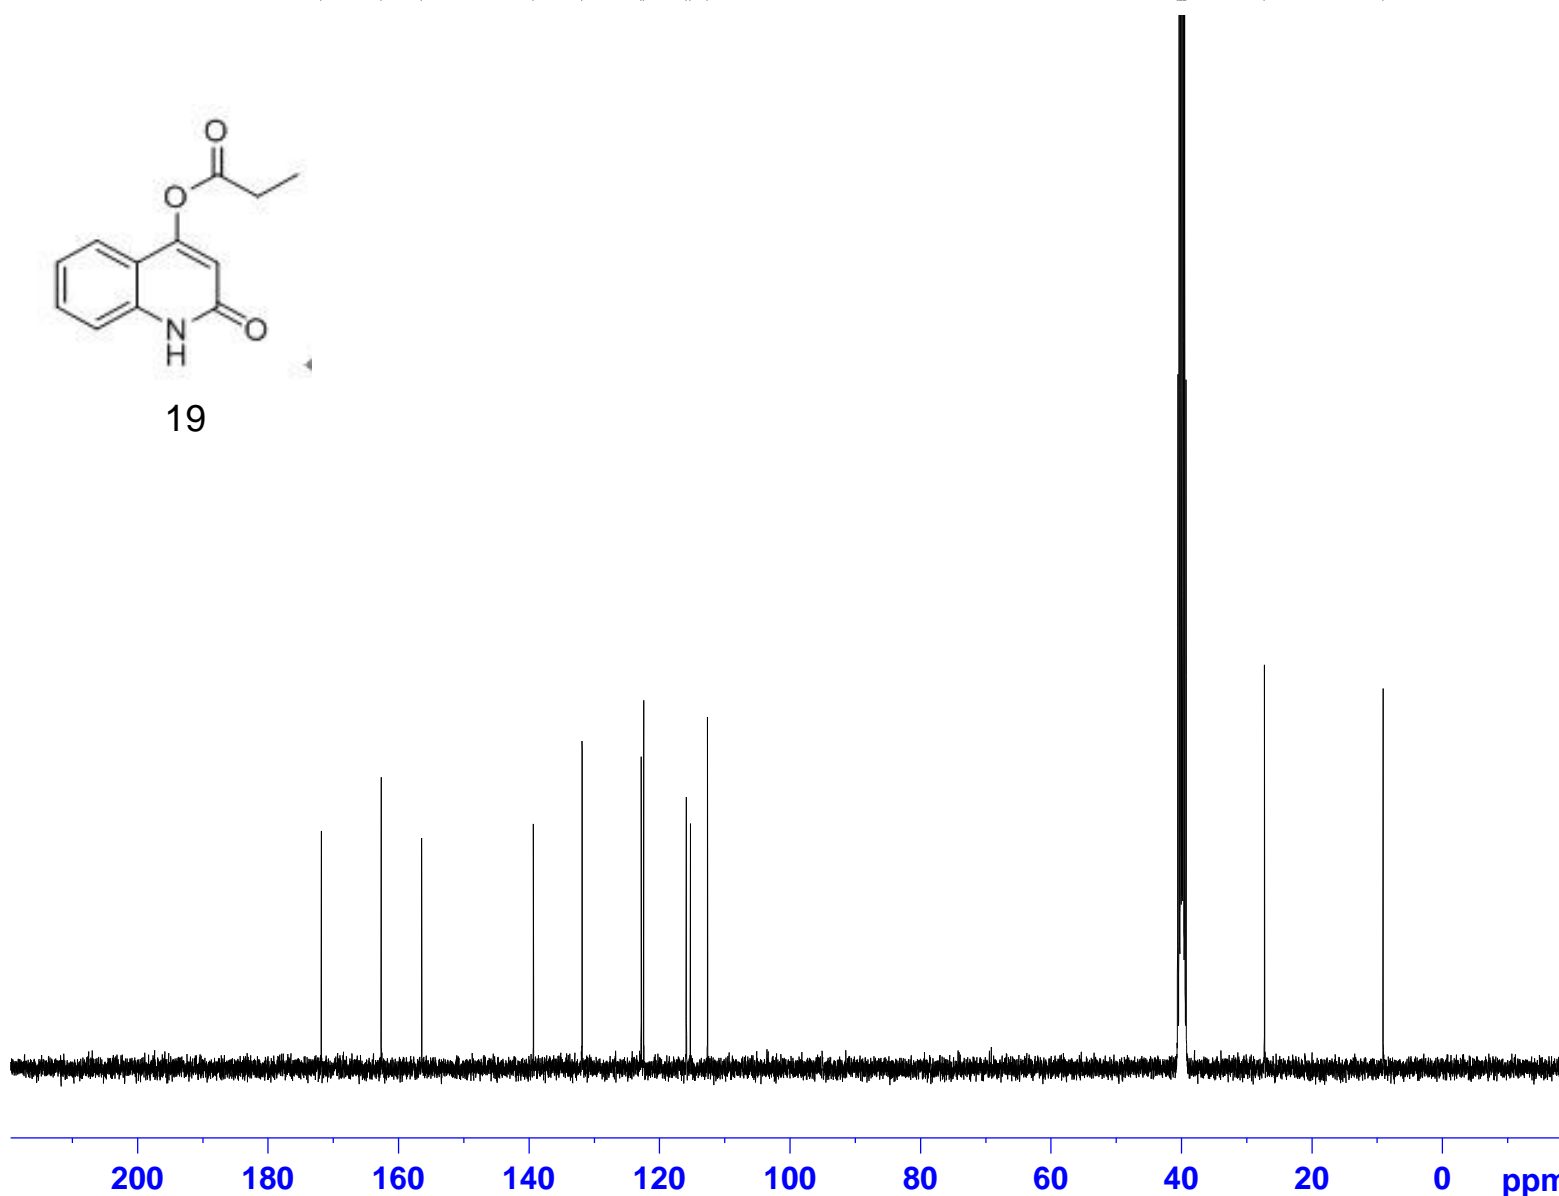

Current Data Parameters  
NAME S-17  
EXPNO 10  
PROCNO 1

F2 - Acquisition Parameters  
Date\_ 20121109  
Time 1.05  
INSTRUM spect  
PROBHD 5 mm PABBO BB-  
PULPROG zgpg30  
TD 65536  
SOLVENT DMSO  
NS 1024  
DS 4  
SWH 24038.461 Hz  
FIDRES 0.366798 Hz  
AQ 1.3631988 sec  
RG 203  
DW 20.800 usec  
DE 6.50 usec  
TE 298.0 K  
D1 2.0000000 sec  
D11 0.0300000 sec

==== CHANNEL f1 =====  
NUC1 13C  
P1 9.65 usec  
PLW1 49.65900040 W  
SFO1 100.6228293 MHz

==== CHANNEL f2 =====  
CPDPRG2 waltz16  
NUC2 1H  
PCPD2 90.00 usec  
PLW2 12.85299969 W  
PLW12 0.34196001 W  
PLW13 0.27699000 W  
SFO2 400.1316005 MHz

F2 - Processing parameters  
SI 32768  
SF 100.6127690 MHz  
WDW EM  
SSB 0  
LB 1.00 Hz  
GB 0  
PC 1.40

Spectrum Graph

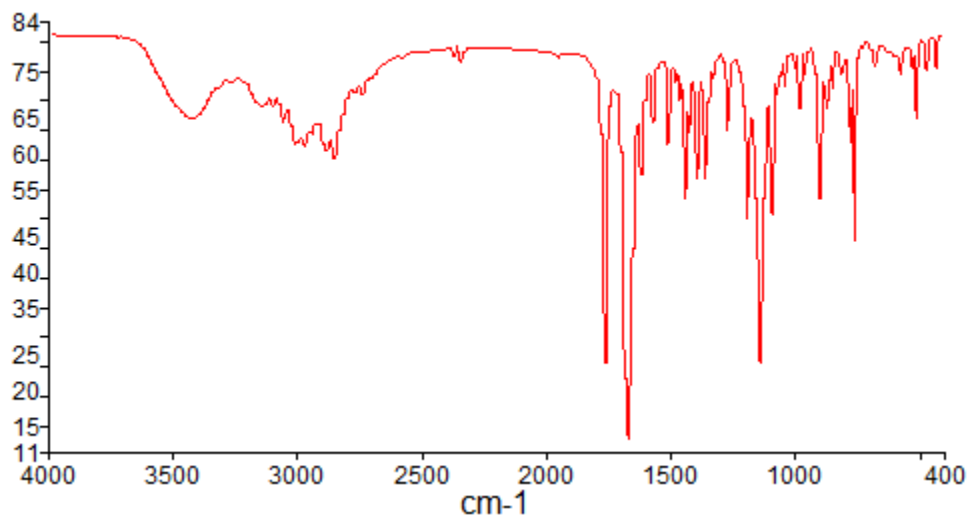

| 名称                | 说明 |
|-------------------|----|
| S20121127-067-S17 |    |

Search Result  
Peak Table Results

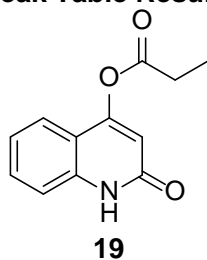

| 频谱名               |
|-------------------|
| S20121127-067-S17 |

| 峰值名 | X      | Y     |
|-----|--------|-------|
| 33  | 428.72 | 75.76 |
| 32  | 464.36 | 75.68 |
| 31  | 510    | 67.37 |
| 30  | 523.38 | 75.99 |
| 29  | 569.23 | 74.85 |
| 28  | 670.43 | 76.34 |
| 27  | 751.55 | 46.32 |
| 26  | 769.18 | 63.43 |
| 25  | 838.34 | 72.57 |
| 24  | 869.02 | 69.06 |

|    |         |       |
|----|---------|-------|
| 23 | 894.12  | 53.82 |
| 22 | 948.16  | 74.96 |
| 21 | 974.1   | 69.15 |
| 20 | 1035.37 | 72.87 |
| 19 | 1060.82 | 71.45 |
| 18 | 1086.55 | 50.99 |
| 17 | 1133.73 | 25.58 |
| 16 | 1188.42 | 50.03 |
| 15 | 1269.42 | 65.26 |
| 14 | 1354.11 | 56.85 |
| 13 | 1385.59 | 57.09 |
| 12 | 1419.94 | 65.07 |
| 11 | 1435.91 | 53.37 |
| 10 | 1457.61 | 70.65 |
| 9  | 1507.28 | 62.88 |
| 8  | 1567.73 | 66.85 |
| 7  | 1615.89 | 57.62 |
| 6  | 1673.63 | 12.38 |
| 5  | 1760.61 | 25.23 |
| 4  | 2861.75 | 60.24 |
| 3  | 2895.3  | 61.7  |
| 2  | 2985.56 | 62.76 |
| 1  | 3436.02 | 67.32 |

S20120925-059

20120925

PROTON DMSO D:\nmr\_data ham

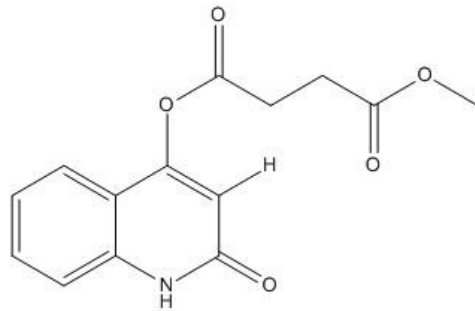

20

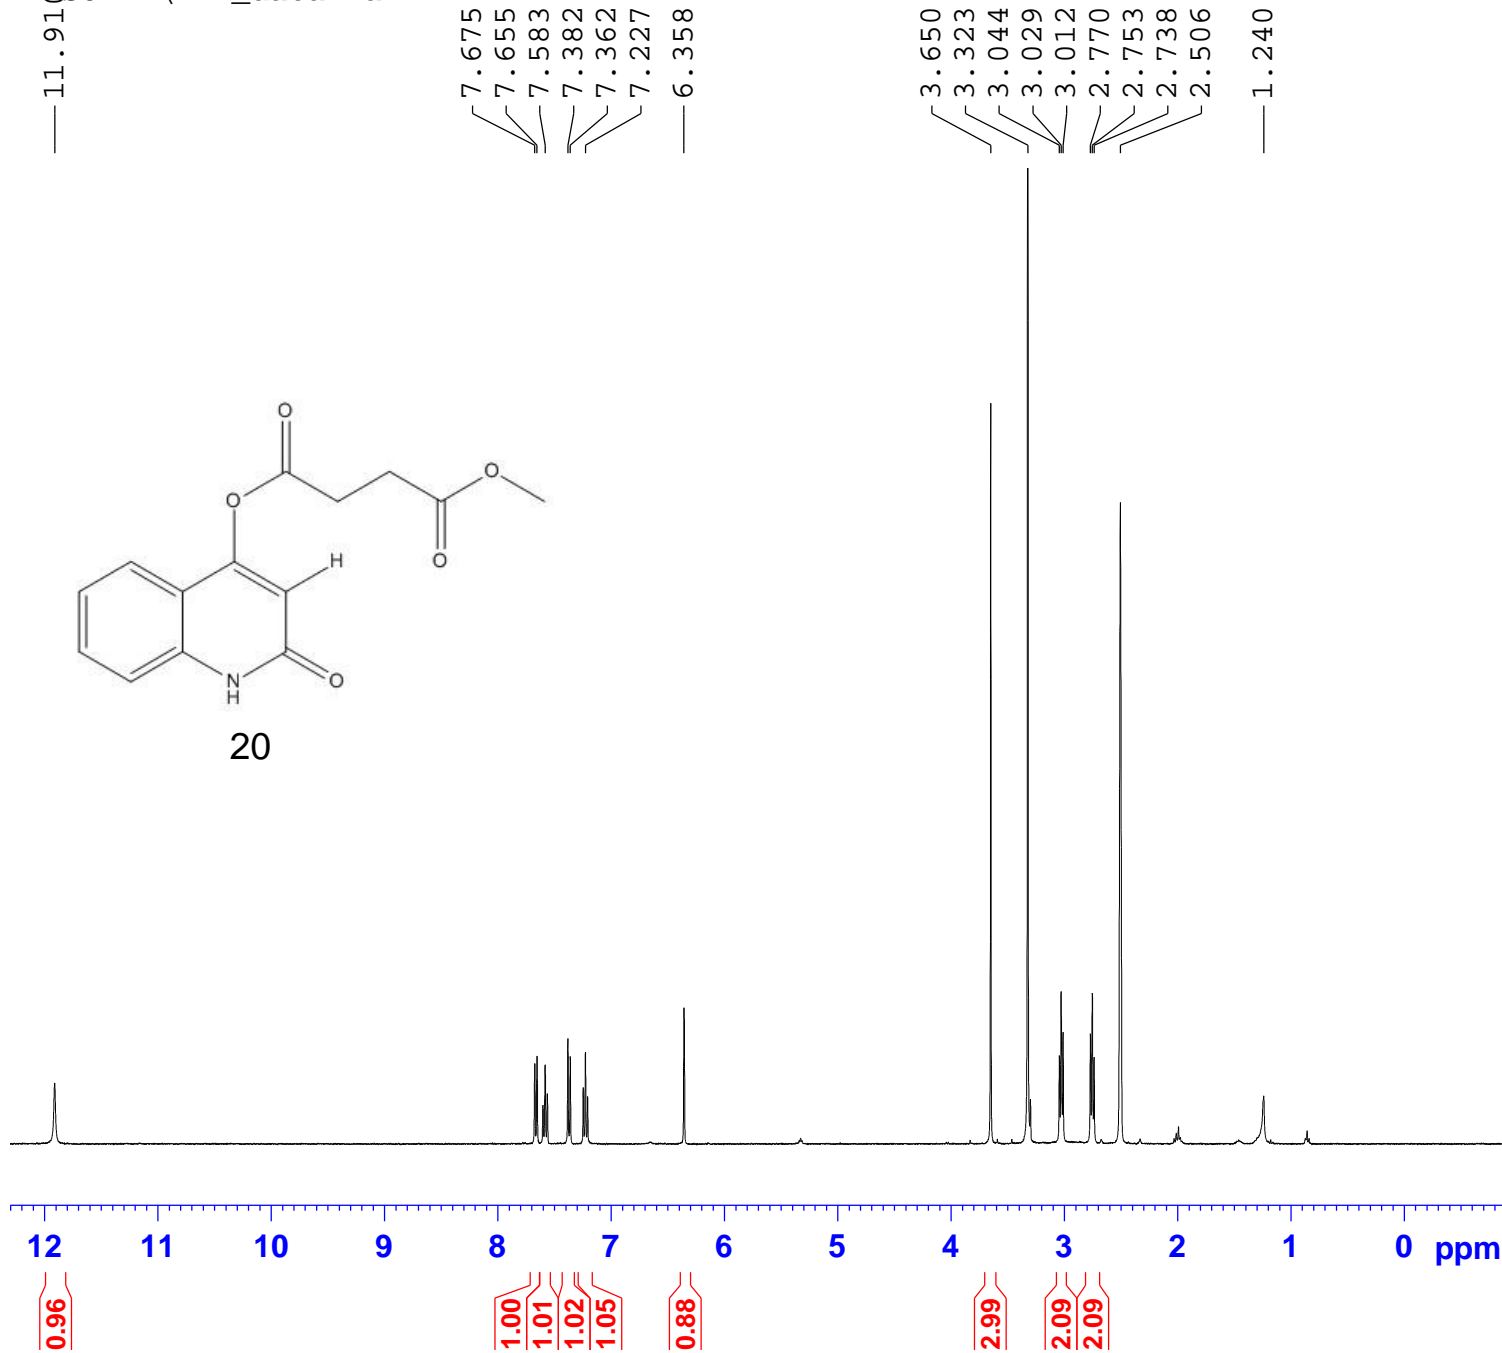

Current Data Parameters  
NAME SYP-N-13  
EXPNO 10  
PROCNO 1

F2 - Acquisition Parameters  
Date\_ 20120925  
Time 17.50  
INSTRUM spect  
PROBHD 5 mm PABBO BB-  
PULPROG zg30  
TD 65536  
SOLVENT DMSO  
NS 16  
DS 2  
SWH 8223.685 Hz  
FIDRES 0.125483 Hz  
AQ 3.9846387 sec  
RG 203  
DW 60.800 usec  
DE 6.50 usec  
TE 298.0 K  
D1 1.00000000 sec

==== CHANNEL f1 =====  
NUC1 1H  
P1 14.50 usec  
PLW1 12.85299969 W  
SFO1 400.1324710 MHz

F2 - Processing parameters  
SI 65536  
SF 400.1300000 MHz  
WDW EM  
SSB 0  
LB 0.30 Hz  
GB 0  
PC 1.00

S20121106-074  
 20121108  
 C13CPD DMSO D:\nmr\_data ham

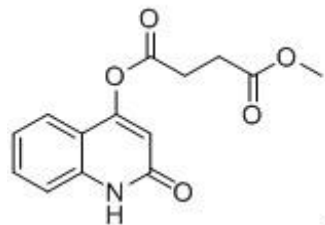

20

172.84  
 170.34  
 162.64  
 156.47  
 139.41  
 131.99  
 122.88  
 122.48  
 115.97  
 115.23  
 112.64

52.14  
 40.61  
 40.40  
 40.19  
 39.98  
 39.77  
 39.57  
 39.36  
 29.33  
 28.82

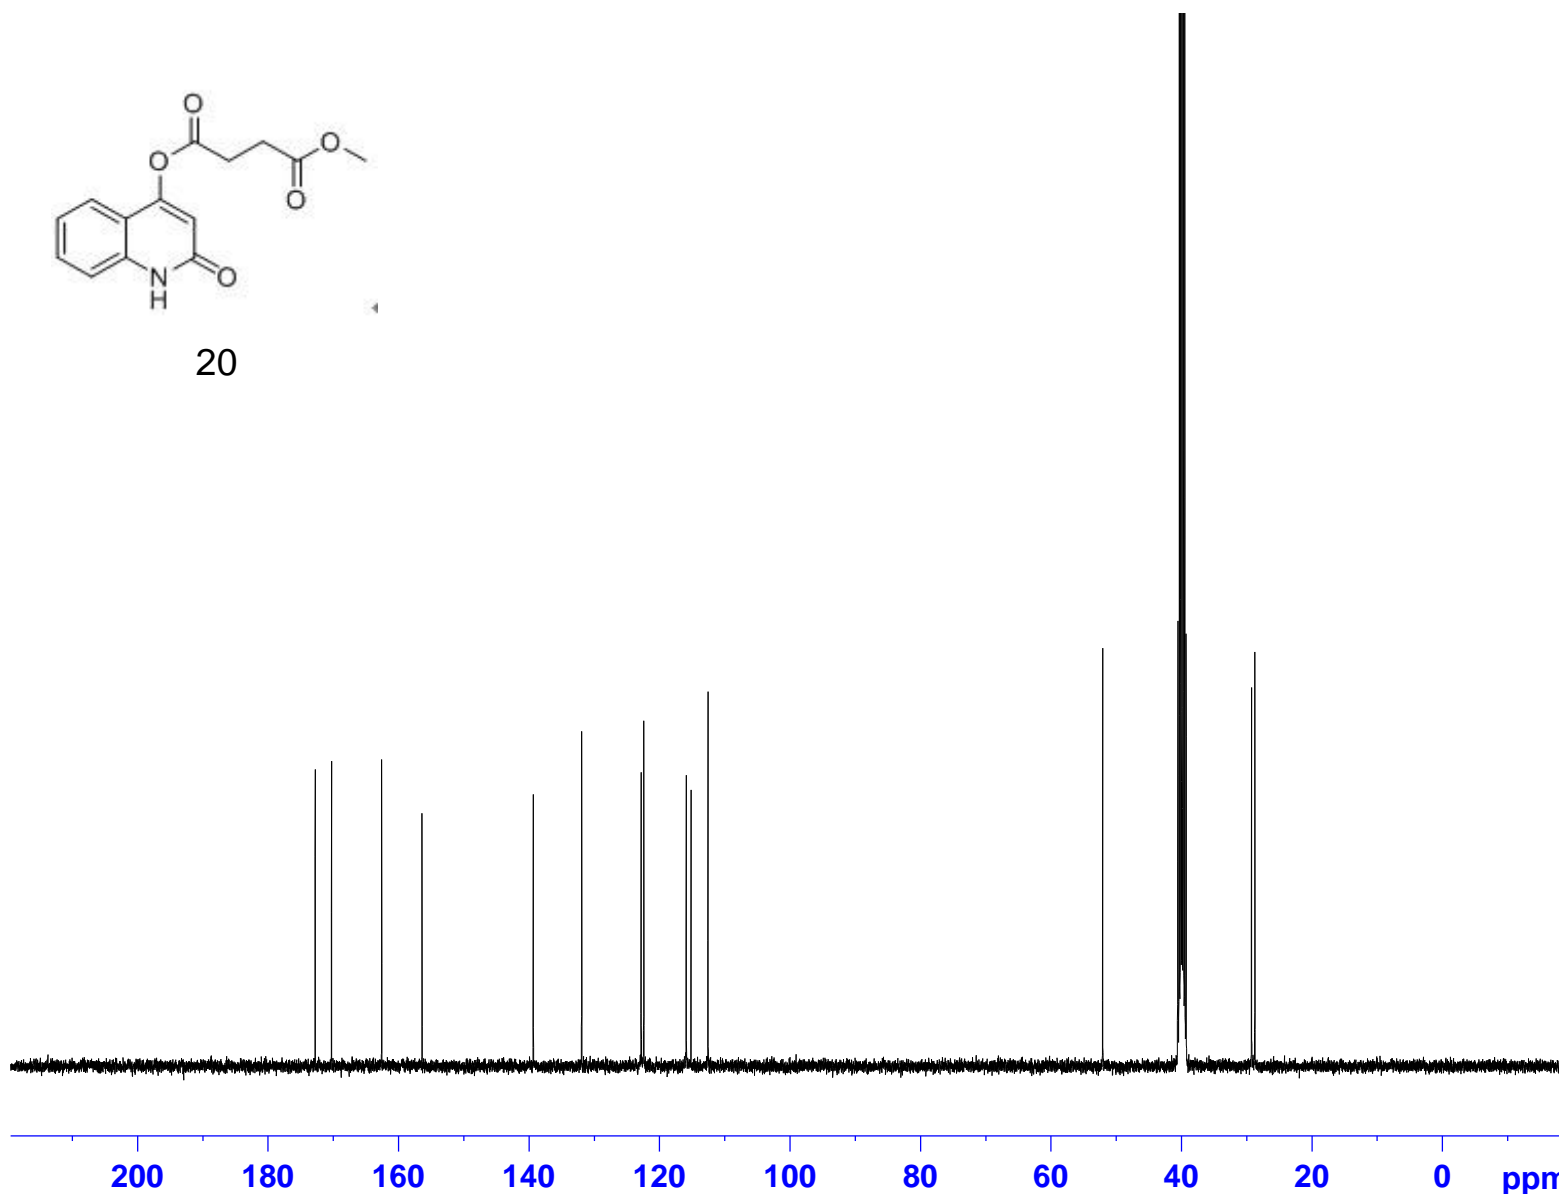

Current Data Parameters  
 NAME S-18  
 EXPNO 10  
 PROCNO 1

F2 - Acquisition Parameters  
 Date\_ 20121109  
 Time 2.06  
 INSTRUM spect  
 PROBHD 5 mm PABBO BB-  
 PULPROG zgpg30  
 TD 65536  
 SOLVENT DMSO  
 NS 1024  
 DS 4  
 SWH 24038.461 Hz  
 FIDRES 0.366798 Hz  
 AQ 1.3631988 sec  
 RG 203  
 DW 20.800 usec  
 DE 6.50 usec  
 TE 298.0 K  
 D1 2.0000000 sec  
 D11 0.0300000 sec

==== CHANNEL f1 =====  
 NUC1 13C  
 P1 9.65 usec  
 PLW1 49.65900040 W  
 SFO1 100.6228293 MHz

==== CHANNEL f2 =====  
 CPDPRG2 waltz16  
 NUC2 1H  
 PCPD2 90.00 usec  
 PLW2 12.85299969 W  
 PLW12 0.34196001 W  
 PLW13 0.27699000 W  
 SFO2 400.1316005 MHz

F2 - Processing parameters  
 SI 32768  
 SF 100.6127690 MHz  
 WDW EM  
 SSB 0  
 LB 1.00 Hz  
 GB 0  
 PC 1.40



### Spectrum Graph

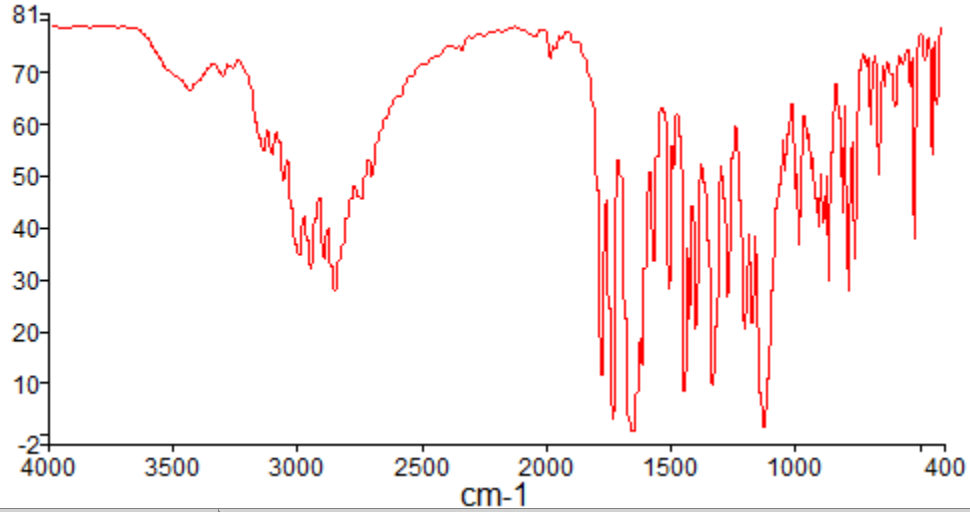

| 名称                | 说明 |
|-------------------|----|
| S20121127-068-S18 |    |

### Search Result Peak Table Results

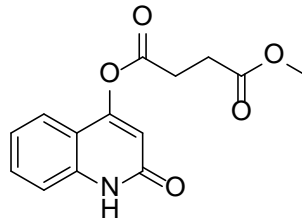

20

| 频谱名               |
|-------------------|
| S20121127-068-S18 |

| 峰值名 | X      | Y     |
|-----|--------|-------|
| 51  | 421.09 | 63.88 |
| 50  | 443.14 | 54.28 |
| 49  | 471.64 | 72.28 |
| 48  | 513.05 | 38.12 |
| 47  | 529.17 | 67.42 |
| 46  | 589.63 | 63.53 |
| 45  | 631.23 | 67.18 |
| 44  | 657.64 | 50.29 |
| 43  | 690.05 | 59.85 |
| 42  | 752.81 | 34.24 |

|    |         |       |
|----|---------|-------|
| 41 | 773.1   | 27.92 |
| 40 | 781.76  | 39.3  |
| 39 | 805.27  | 42.85 |
| 38 | 854.59  | 29.99 |
| 37 | 870.4   | 42.5  |
| 36 | 879.75  | 41.07 |
| 35 | 896.78  | 40.48 |
| 34 | 932.04  | 51.52 |
| 33 | 979.37  | 36.85 |
| 32 | 994.03  | 47.83 |
| 31 | 1032.83 | 51.07 |
| 30 | 1117.12 | 1.28  |
| 29 | 1146.99 | 19.87 |
| 28 | 1167.61 | 21.84 |
| 27 | 1188.84 | 20.57 |
| 26 | 1195.76 | 21.24 |
| 25 | 1269.84 | 26.83 |
| 24 | 1329.1  | 9.77  |
| 23 | 1396.97 | 20.11 |
| 22 | 1421.83 | 22.25 |
| 21 | 1441.3  | 8.43  |
| 20 | 1483.91 | 51.63 |
| 19 | 1502.52 | 27.99 |
| 18 | 1565.71 | 33.52 |
| 17 | 1612.69 | 13.13 |
| 16 | 1650.99 | 0.38  |
| 15 | 1733.47 | 2.73  |
| 14 | 1772.18 | 11.37 |
| 13 | 1778.57 | 12.15 |
| 12 | 1982.58 | 72.68 |
| 11 | 2709.6  | 50.13 |
| 10 | 2747.19 | 45.64 |
| 9  | 2856.39 | 27.86 |
| 8  | 2897.32 | 34.02 |
| 7  | 2955.02 | 32.11 |
| 6  | 3001.08 | 34.83 |
| 5  | 3066.79 | 49.03 |
| 4  | 3107.54 | 54.24 |
| 3  | 3143.77 | 55    |
| 2  | 3311.36 | 69.47 |
| 1  | 3439.19 | 66.66 |

S20121106-059

20121106

PROTON DMSO D<sub>6</sub> \nmr\_data ham



Current Data Parameters  
NAME S21  
EXPNO 10  
PROCNO 1

F2 - Acquisition Parameters  
Date\_ 20121107  
Time 3.28  
INSTRUM spect  
PROBHD 5 mm PABBO BB-  
PULPROG zg30  
TD 65536  
SOLVENT DMSO  
NS 16  
DS 2  
SWH 8223.685 Hz  
FIDRES 0.125483 Hz  
AQ 3.9846387 sec  
RG 203  
DW 60.800 usec  
DE 6.50 usec  
TE 297.9 K  
D1 1.00000000 sec

==== CHANNEL f1 =====  
NUC1 1H  
P1 14.50 usec  
PLW1 12.85299969 W  
SFO1 400.1324710 MHz

F2 - Processing parameters  
SI 65536  
SF 400.1300000 MHz  
WDW EM  
SSB 0  
LB 0.30 Hz  
GB 0  
PC 1.00

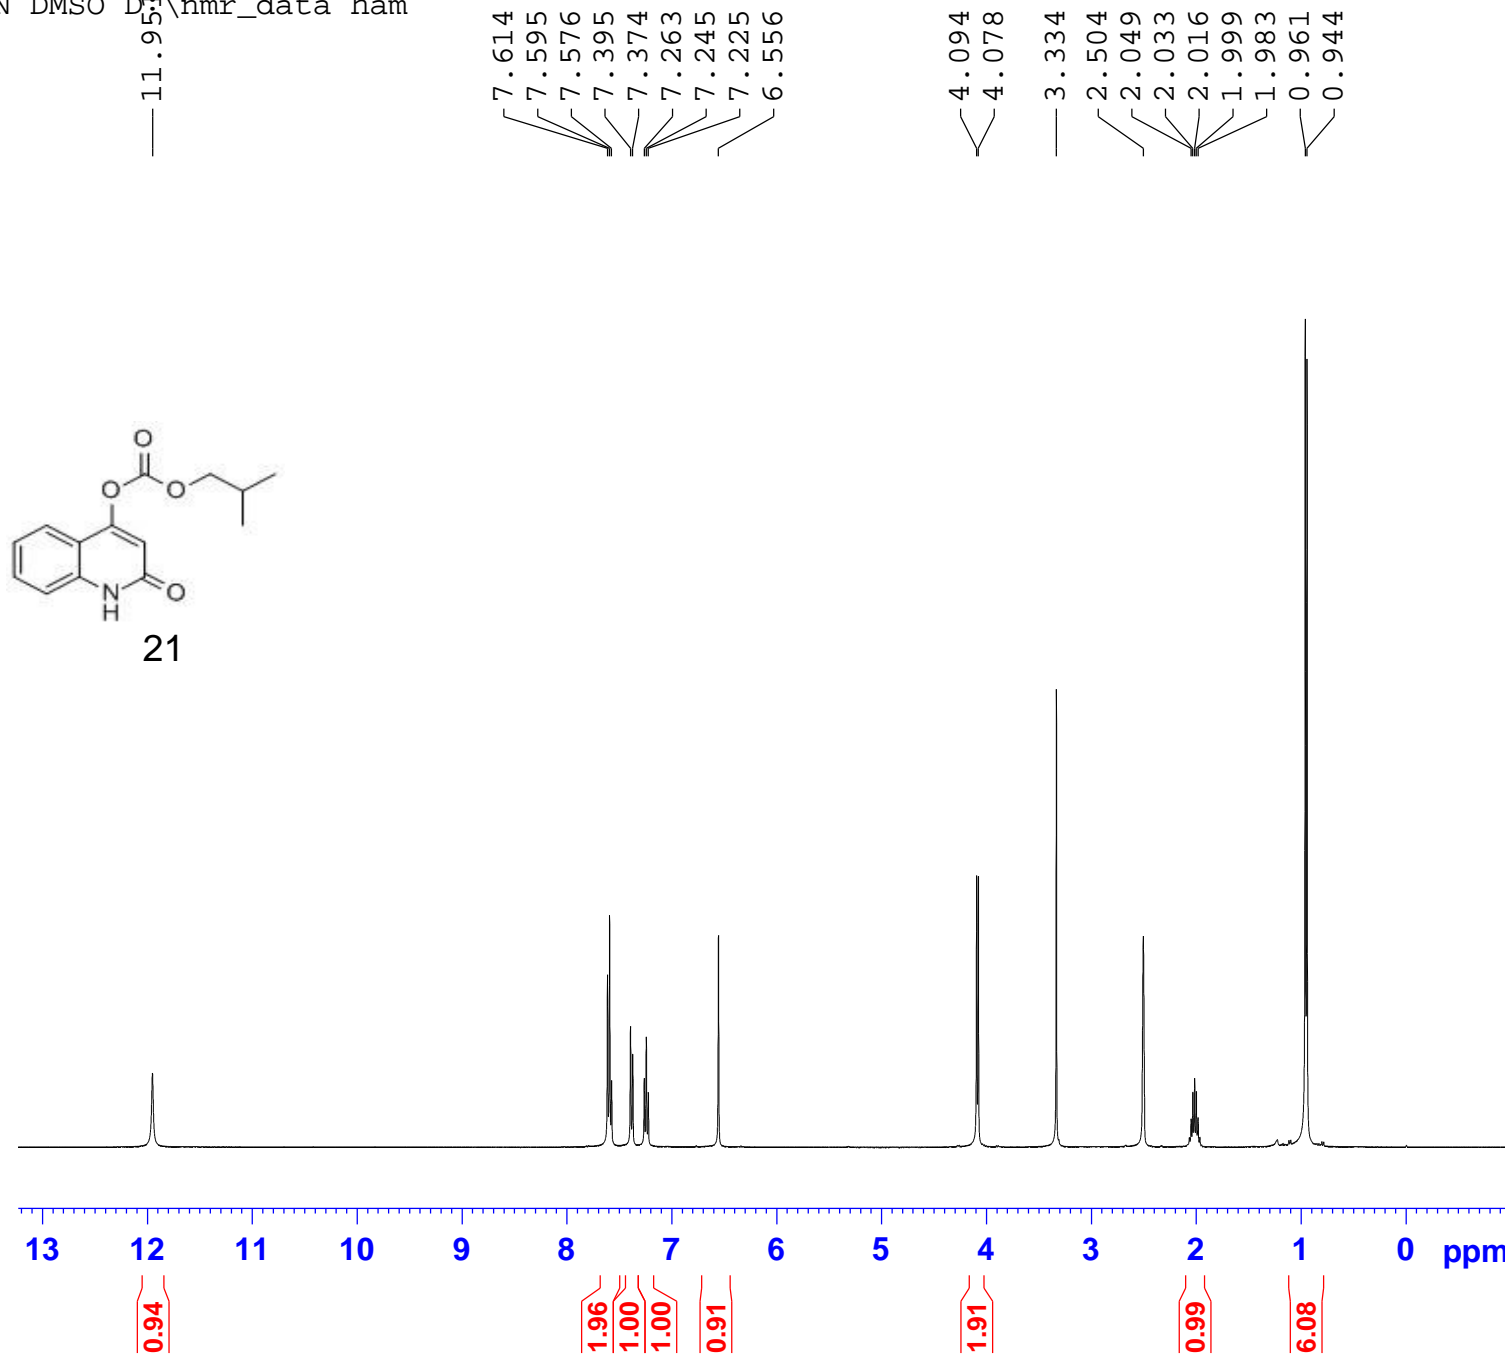

S20121106-059

20121106

C13CPD DMSO D:\nmr\_data\ham

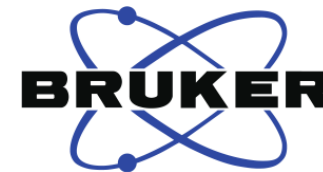

Current Data Parameters  
NAME S21  
EXPNO 11  
PROCNO 1

F2 - Acquisition Parameters  
Date\_ 20121107  
Time 4.28  
INSTRUM spect  
PROBHD 5 mm PABBO BB-  
PULPROG zgpg30  
TD 65536  
SOLVENT DMSO  
NS 1024  
DS 4  
SWH 24038.461 Hz  
FIDRES 0.366798 Hz  
AQ 1.3631988 sec  
RG 203  
DW 20.800 usec  
DE 6.50 usec  
TE 298.1 K  
D1 2.0000000 sec  
D11 0.0300000 sec

=====  
CHANNEL f1  
NUC1 13C  
P1 9.65 usec  
PLW1 49.65900040 W  
SFO1 100.6228293 MHz

=====  
CHANNEL f2  
CPDPRG2 waltz16  
NUC2 1H  
PCPD2 90.00 usec  
PLW2 12.85299969 W  
PLW12 0.34196001 W  
PLW13 0.27699000 W  
SFO2 400.1316005 MHz

F2 - Processing parameters  
SI 32768  
SF 100.6127690 MHz  
WDW EM  
SSB 0  
LB 1.00 Hz  
GB 0  
PC 1.40

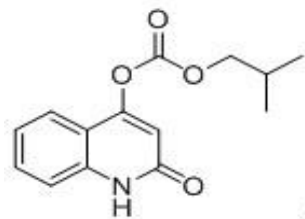

21

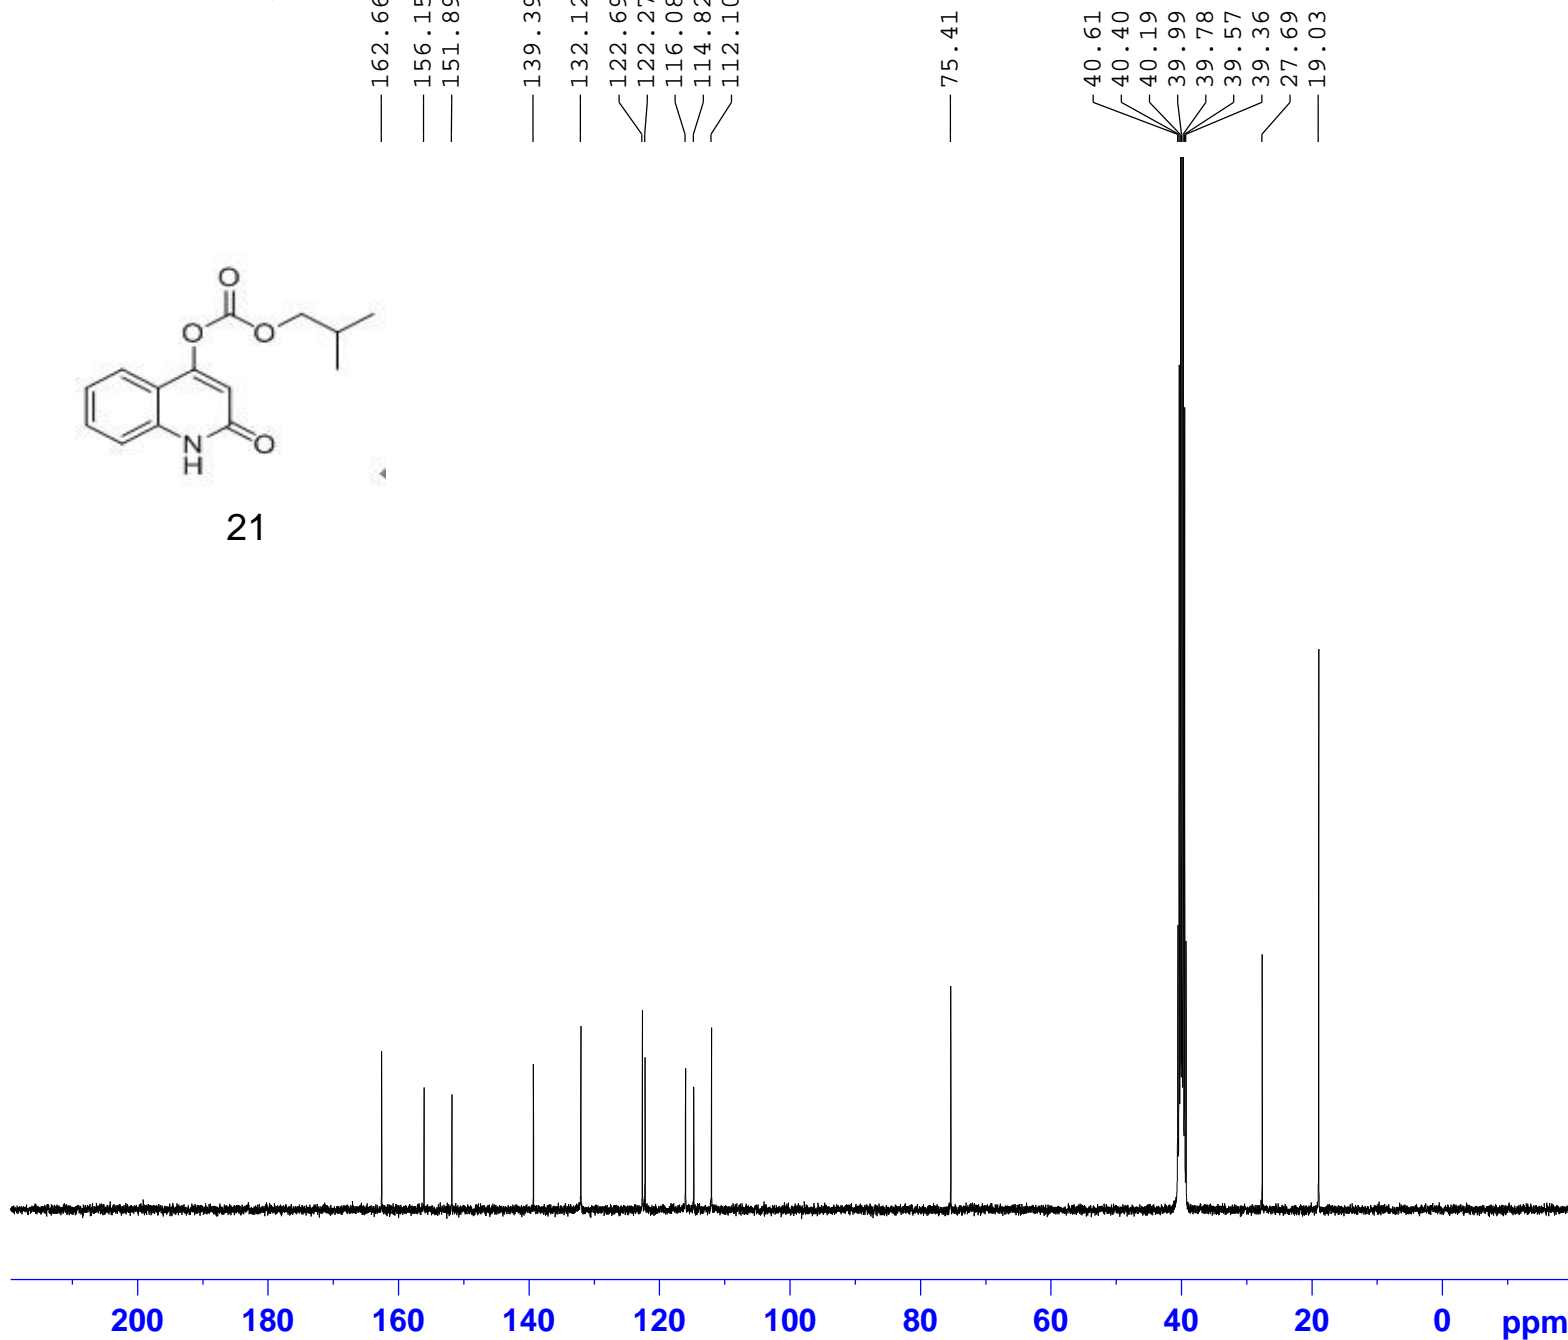

Spectrum Graph

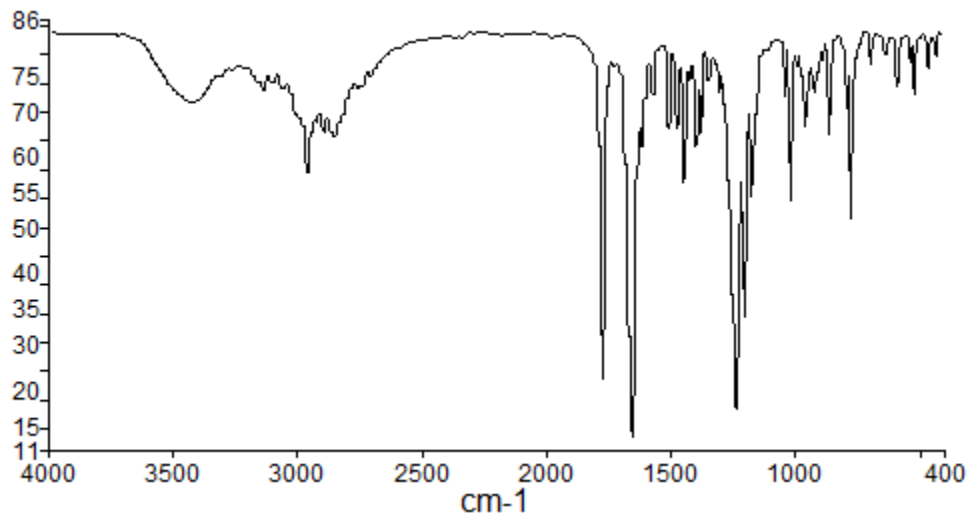

| 名称                | 说明 |
|-------------------|----|
| S20121127-071-S21 |    |

Search Result  
Peak Table Results

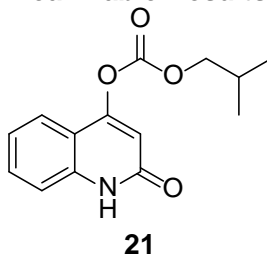

| 频谱名               |
|-------------------|
| S20121127-071-S21 |

| 峰值名 | X      | Y     |
|-----|--------|-------|
| 36  | 421.47 | 79.95 |
| 35  | 452.08 | 77.95 |
| 34  | 517.04 | 73.54 |
| 33  | 532.61 | 79.07 |
| 32  | 581.89 | 74.9  |
| 31  | 627.01 | 80.3  |
| 30  | 691    | 78.81 |
| 29  | 759.36 | 68.1  |
| 28  | 771.61 | 51.47 |
| 27  | 787.45 | 71    |

|    |         |       |
|----|---------|-------|
| 26 | 856.87  | 66.62 |
| 25 | 910.12  | 73.72 |
| 24 | 946.49  | 70.95 |
| 23 | 959.9   | 68.05 |
| 22 | 1010.02 | 55.14 |
| 21 | 1034.43 | 72.97 |
| 20 | 1157.96 | 66.08 |
| 19 | 1170.58 | 55.74 |
| 18 | 1195.99 | 34.7  |
| 17 | 1231.04 | 18.34 |
| 16 | 1303.28 | 73.95 |
| 15 | 1340.54 | 75.79 |
| 14 | 1377.72 | 65.6  |
| 13 | 1393.57 | 64.57 |
| 12 | 1443.67 | 57.7  |
| 11 | 1470.69 | 67.57 |
| 10 | 1504.63 | 67.7  |
| 9  | 1567.51 | 73.36 |
| 8  | 1609.15 | 64.15 |
| 7  | 1655.19 | 13.2  |
| 6  | 1774.14 | 23.53 |
| 5  | 2859.17 | 65.84 |
| 4  | 2897.84 | 66.69 |
| 3  | 2965.5  | 59.65 |
| 2  | 3144.59 | 74.23 |
| 1  | 3435.65 | 71.92 |

S20121106-060

20121106

PROTON DMSO D:\nmr\data/ham

7.843  
7.824  
7.735  
7.727  
7.717  
7.707  
7.680  
7.672  
7.650  
7.590  
7.407  
7.401  
7.325  
6.748

3.882  
3.673  
3.327  
2.505



Current Data Parameters  
NAME S22  
EXPNO 10  
PROCNO 1

F2 - Acquisition Parameters  
Date\_ 20121107  
Time 4.32  
INSTRUM spect  
PROBHD 5 mm PABBO BB-  
PULPROG zg30  
TD 65536  
SOLVENT DMSO  
NS 16  
DS 2  
SWH 8223.685 Hz  
FIDRES 0.125483 Hz  
AQ 3.9846387 sec  
RG 203  
DW 60.800 usec  
DE 6.50 usec  
TE 298.0 K  
D1 1.00000000 sec

==== CHANNEL f1 =====  
NUC1 1H  
P1 14.50 usec  
PLW1 12.85299969 W  
SFO1 400.1324710 MHz

F2 - Processing parameters  
SI 65536  
SF 400.1300000 MHz  
WDW EM  
SSB 0  
LB 0.30 Hz  
GB 0  
PC 1.00

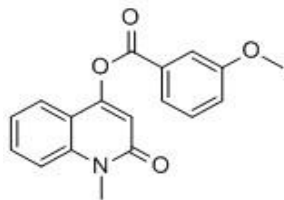

22

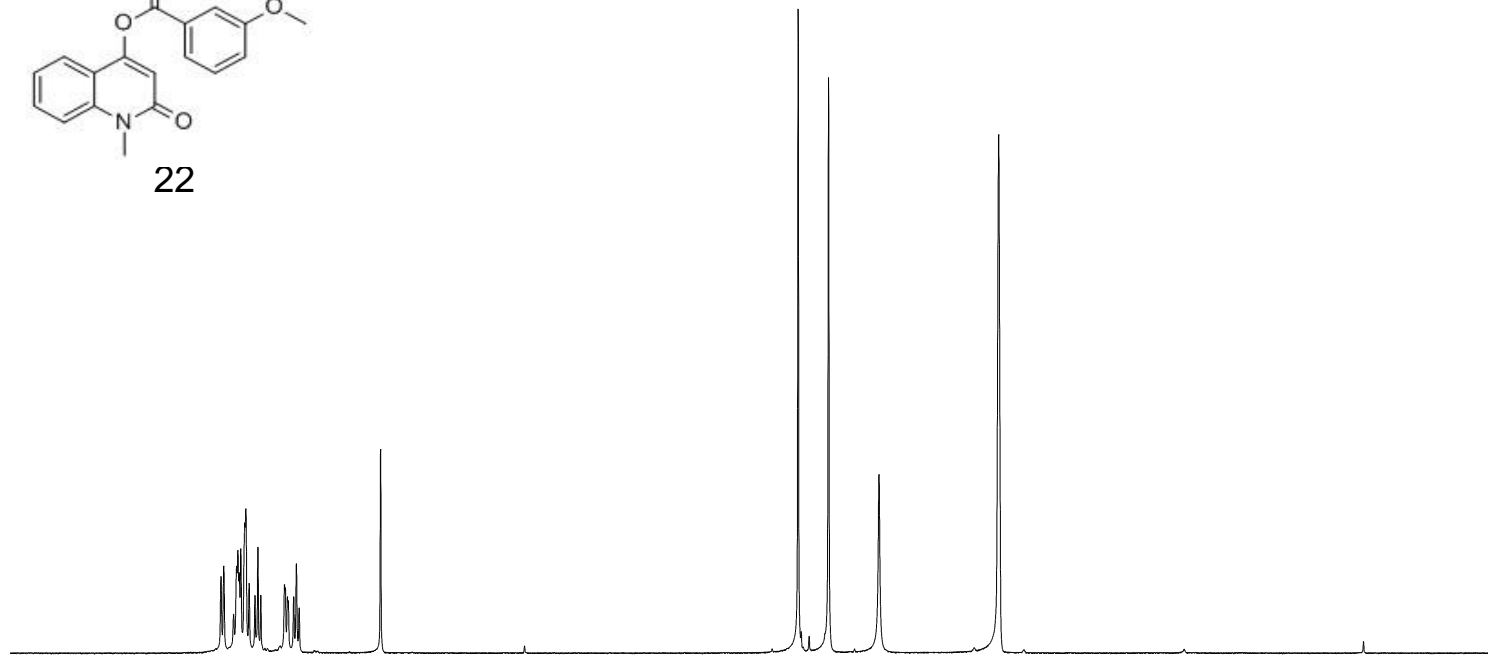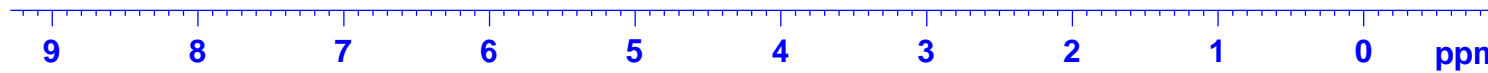

1.02  
3.92  
1.05  
1.04  
0.94  
0.88

3.00  
2.87

S20121106-060

20121106

C13CPD DMSO D:\nmr\_data ham

163.63  
161.85  
160.02  
155.36  
140.27  
132.49  
130.89  
129.68  
123.15  
122.90  
122.88  
121.26  
116.15  
115.74  
115.06  
112.46

56.02  
40.62  
40.41  
40.20  
39.99  
39.79  
39.58  
39.37  
29.71

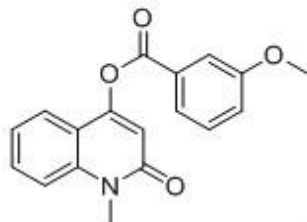

22

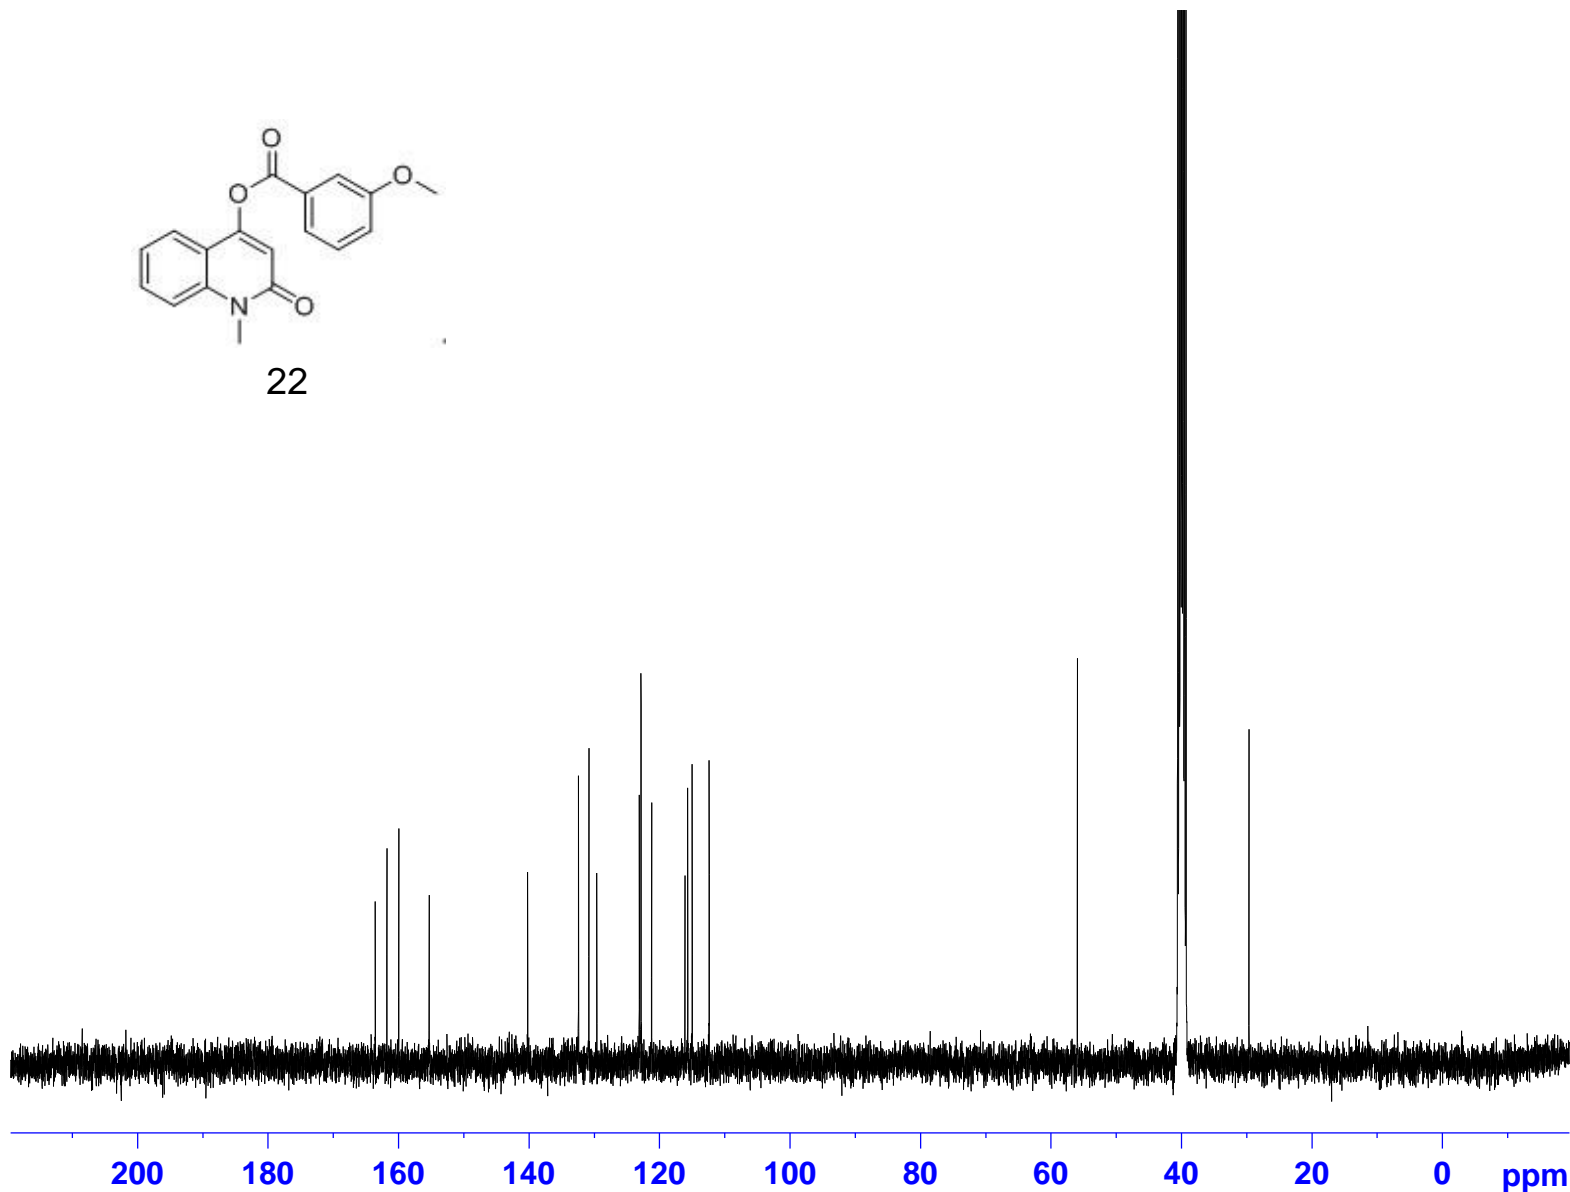

Current Data Parameters  
NAME S22  
EXPNO 11  
PROCNO 1

F2 - Acquisition Parameters  
Date\_ 20121107  
Time 5.32  
INSTRUM spect  
PROBHD 5 mm PABBO BB-  
PULPROG zgpg30  
TD 65536  
SOLVENT DMSO  
NS 1024  
DS 4  
SWH 24038.461 Hz  
FIDRES 0.366798 Hz  
AQ 1.3631988 sec  
RG 203  
DW 20.800 usec  
DE 6.50 usec  
TE 298.3 K  
D1 2.0000000 sec  
D11 0.0300000 sec

==== CHANNEL f1 =====  
NUC1 13C  
P1 9.65 usec  
PLW1 49.65900040 W  
SFO1 100.6228293 MHz

==== CHANNEL f2 =====  
CPDPRG2 waltz16  
NUC2 1H  
PCPD2 90.00 usec  
PLW2 12.85299969 W  
PLW12 0.34196001 W  
PLW13 0.27699000 W  
SFO2 400.1316005 MHz

F2 - Processing parameters  
SI 32768  
SF 100.6127690 MHz  
WDW EM  
SSB 0  
LB 1.00 Hz  
GB 0  
PC 1.40



### Spectrum Graph

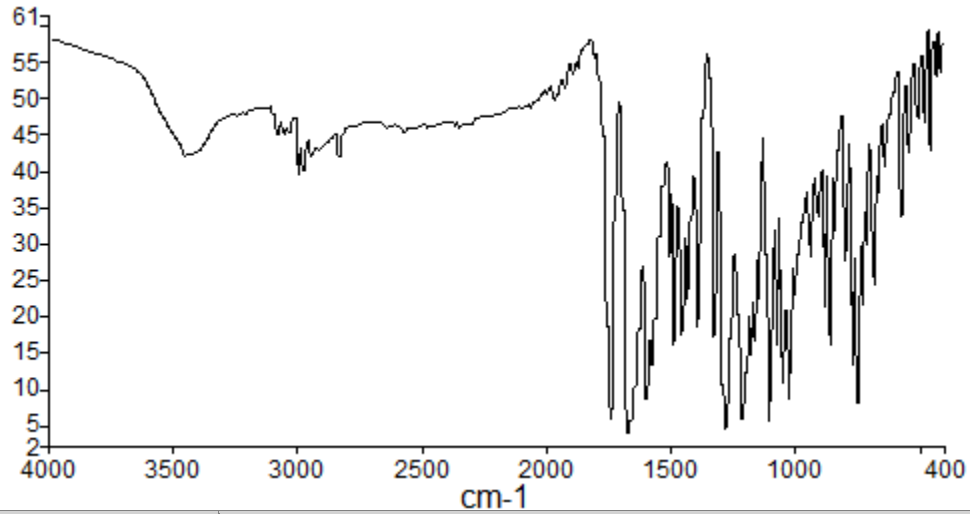

| 名称                | 说明 |
|-------------------|----|
| S20121127-072-S22 |    |

### Search Result Peak Table Results

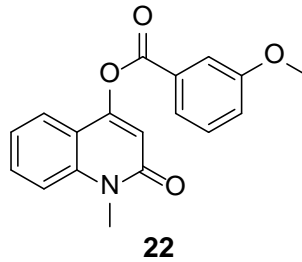

| 频谱名               |
|-------------------|
| S20121127-072-S22 |

| 峰值名 | X      | Y     |
|-----|--------|-------|
| 58  | 408.88 | 54.03 |
| 57  | 424.56 | 53.34 |
| 56  | 446.93 | 42.97 |
| 55  | 474.23 | 47.11 |
| 54  | 498.61 | 47.67 |
| 53  | 535.71 | 42.74 |
| 52  | 564.84 | 34.15 |
| 51  | 634.25 | 40.85 |
| 50  | 661.69 | 37.15 |

|    |         |       |
|----|---------|-------|
| 49 | 675.33  | 24.6  |
| 48 | 688.87  | 30.61 |
| 47 | 708.11  | 29.94 |
| 46 | 721.41  | 21.75 |
| 45 | 740.38  | 8.04  |
| 44 | 753.44  | 17.81 |
| 43 | 765.18  | 13.39 |
| 42 | 791.26  | 27.74 |
| 41 | 829.02  | 31.93 |
| 40 | 851.94  | 16.34 |
| 39 | 874.83  | 21.58 |
| 38 | 900.14  | 33.94 |
| 37 | 931.74  | 28.48 |
| 36 | 948.35  | 32.92 |
| 35 | 993.44  | 23.05 |
| 34 | 1023.4  | 8.74  |
| 33 | 1043.63 | 10.98 |
| 32 | 1066.55 | 16.31 |
| 31 | 1087.41 | 17.13 |
| 30 | 1102    | 5.45  |
| 29 | 1141.55 | 22.5  |
| 28 | 1159.45 | 16.82 |
| 27 | 1170.77 | 14.75 |
| 26 | 1200.02 | 6.09  |
| 25 | 1212.36 | 5.84  |
| 24 | 1274.57 | 4.44  |
| 23 | 1321.68 | 17.39 |
| 22 | 1390.69 | 18.68 |
| 21 | 1421.09 | 27.24 |
| 20 | 1432.91 | 22.41 |
| 19 | 1445.83 | 20.28 |
| 18 | 1456.83 | 17.61 |
| 17 | 1486.99 | 15.86 |
| 16 | 1502.19 | 28.29 |
| 15 | 1568.54 | 13.13 |
| 14 | 1583.54 | 10.91 |
| 13 | 1595.99 | 8.43  |
| 12 | 1629.15 | 16.24 |
| 11 | 1663.59 | 3.75  |
| 10 | 1741.75 | 5.74  |
| 9  | 1961.69 | 50.1  |
| 8  | 2575.32 | 45.7  |
| 7  | 2837.39 | 42.23 |
| 6  | 2948.95 | 42.28 |
| 5  | 2980.65 | 40.06 |
| 4  | 3002.56 | 39.5  |

|   |         |       |
|---|---------|-------|
| 3 | 3060.89 | 45.36 |
| 2 | 3088.53 | 45.42 |
| 1 | 3460.1  | 42.28 |

S20121106-058

20121106

PROTON DMSO

8.168  
7.738  
7.731  
7.728  
7.721  
7.714  
7.708  
7.702  
7.641  
7.620  
7.385  
7.375  
7.373  
7.363  
7.342  
7.322  
7.304  
6.757

3.651

3.347

2.510

2.505

2.501

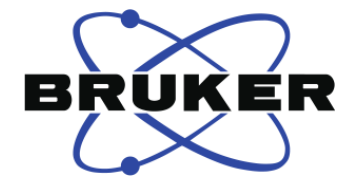

Current Data Parameters  
NAME S20  
EXPNO 10  
PROCNO 1

F2 - Acquisition Parameters  
Date\_ 20121107  
Time 2.24  
INSTRUM spect  
PROBHD 5 mm PABBO BB-  
PULPROG zg30  
TD 65536  
SOLVENT DMSO  
NS 16  
DS 2  
SWH 8223.685 Hz  
FIDRES 0.125483 Hz  
AQ 3.9846387 sec  
RG 114  
DW 60.800 usec  
DE 6.50 usec  
TE 298.0 K  
D1 1.0000000 sec

==== CHANNEL f1 =====  
NUC1 1H  
P1 14.50 usec  
PLW1 12.85299969 W  
SFO1 400.1324710 MHz

F2 - Processing parameters  
SI 65536  
SF 400.1300000 MHz  
WDW EM  
SSB 0  
LB 0.30 Hz  
GB 0  
PC 1.00

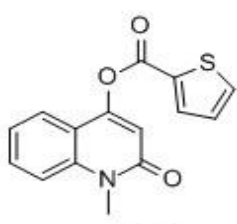

23

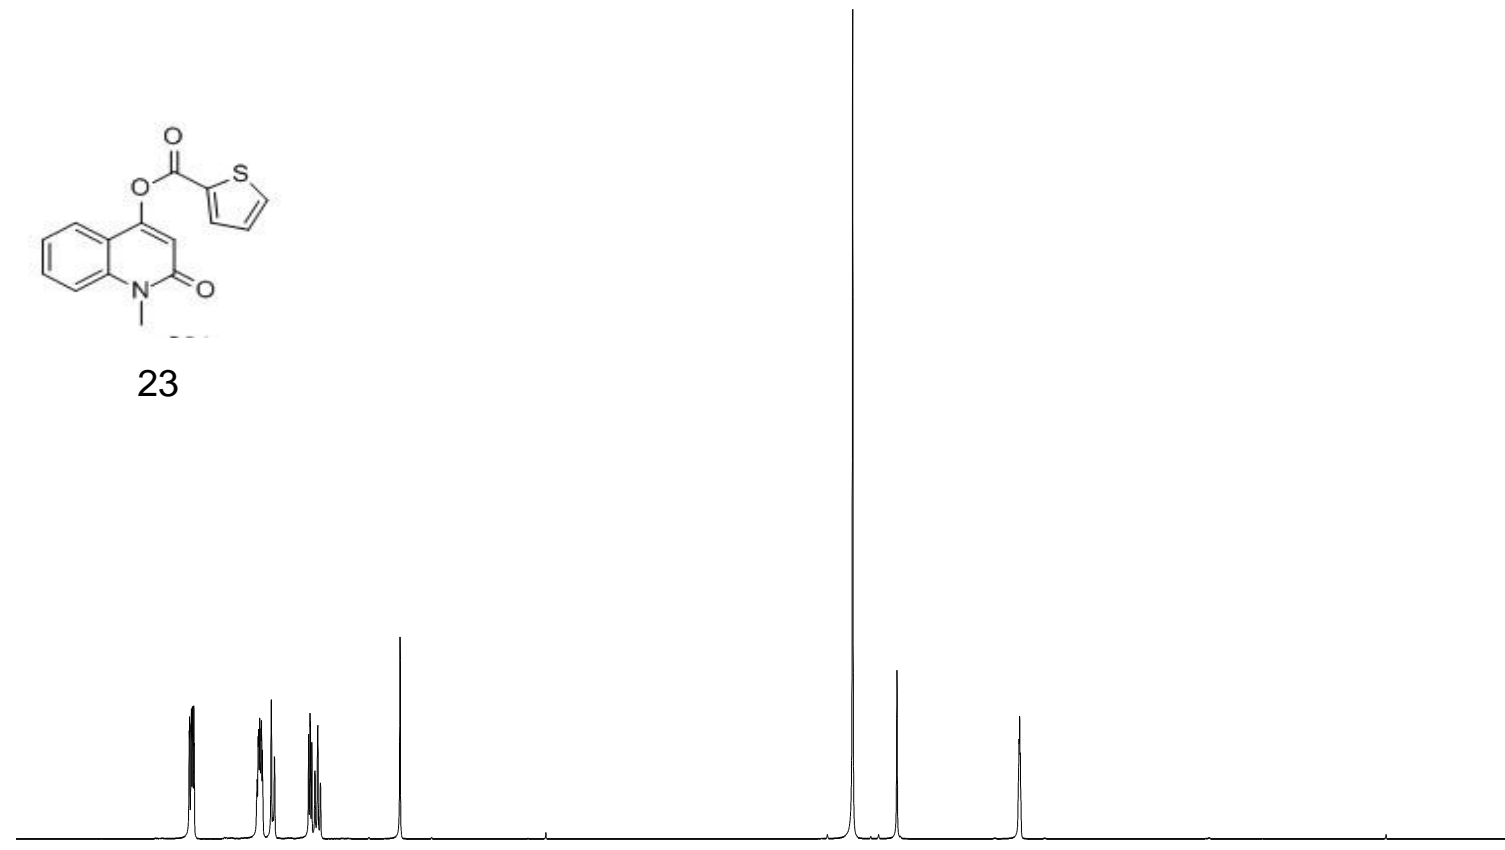

9 8 7 6 5 4 3 2 1 0 ppm

1.91  
2.00  
1.00  
1.02  
0.96  
0.89

2.97

S20121106-058

20121106

C13CPD DMSO D:\nmr\_data ham



Current Data Parameters  
NAME S20  
EXPNO 11  
PROCNO 1

F2 - Acquisition Parameters  
Date\_ 20121107  
Time 3.24  
INSTRUM spect  
PROBHD 5 mm PABBO BB-  
PULPROG zgpg30  
TD 65536  
SOLVENT DMSO  
NS 1024  
DS 4  
SWH 24038.461 Hz  
FIDRES 0.366798 Hz  
AQ 1.3631988 sec  
RG 203  
DW 20.800 usec  
DE 6.50 usec  
TE 298.5 K  
D1 2.0000000 sec  
D11 0.0300000 sec

==== CHANNEL f1 =====  
NUC1 13C  
P1 9.65 usec  
PLW1 49.65900040 W  
SFO1 100.6228293 MHz

==== CHANNEL f2 =====  
CPDPRG2 waltz16  
NUC2 1H  
PCPD2 90.00 usec  
PLW2 12.85299969 W  
PLW12 0.34196001 W  
PLW13 0.27699000 W  
SFO2 400.1316005 MHz

F2 - Processing parameters  
SI 32768  
SF 100.6127690 MHz  
WDW EM  
SSB 0  
LB 1.00 Hz  
GB 0  
PC 1.40

161.79  
159.07  
154.71  
140.23  
136.88  
136.68  
132.48  
131.09  
129.51  
122.98  
122.86  
116.05  
115.71  
112.28

40.62  
40.41  
40.20  
40.00  
39.79  
39.58  
39.37  
29.69

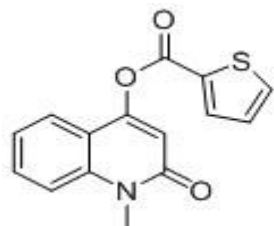

23

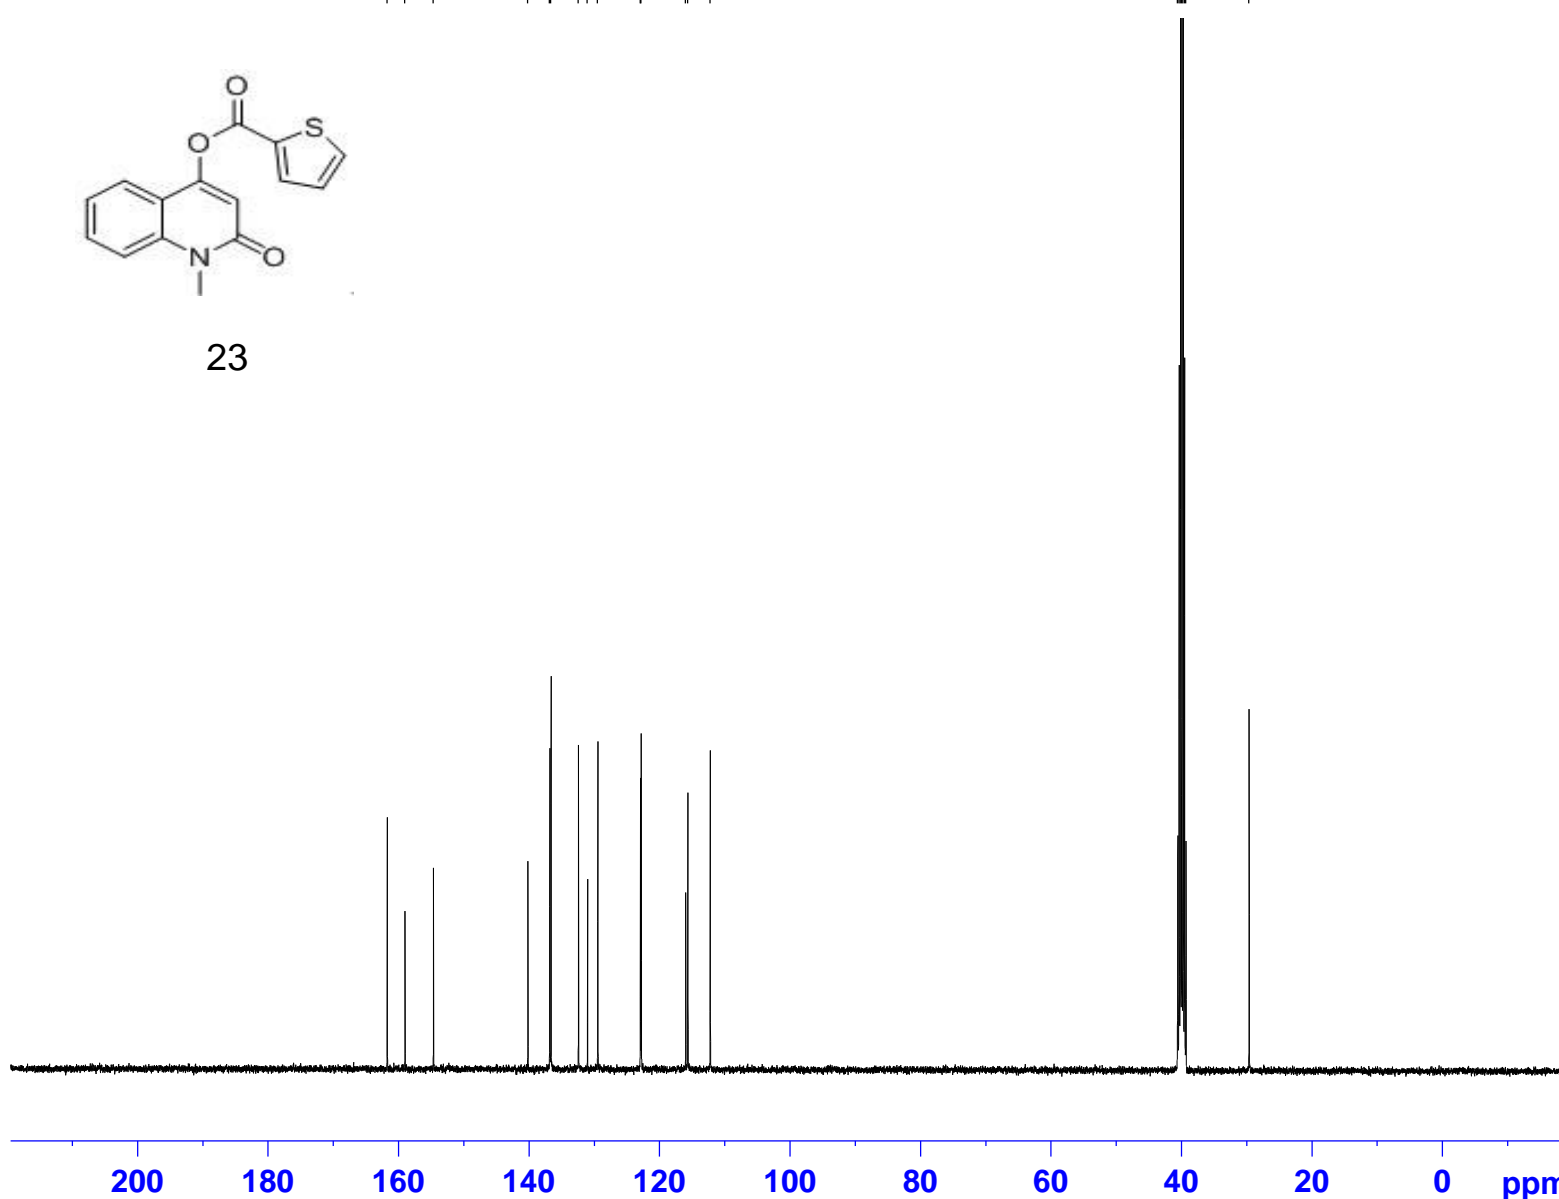

Spectrum Graph

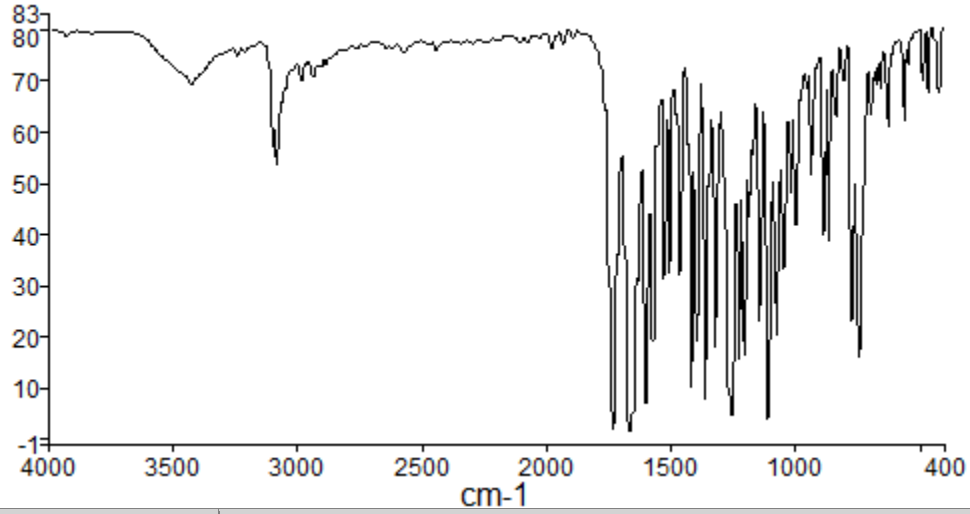

| 名称                | 说明 |
|-------------------|----|
| S20121127-070-S20 |    |

Search Result  
Peak Table Results

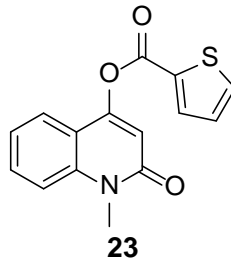

| 频谱名               |
|-------------------|
| S20121127-070-S20 |

| 峰值名 | X      | Y     |
|-----|--------|-------|
| 51  | 414.79 | 68.1  |
| 50  | 454.8  | 68.19 |
| 49  | 478.9  | 70.39 |
| 48  | 532.29 | 73.65 |
| 47  | 548.63 | 62.73 |
| 46  | 618.43 | 61.66 |
| 45  | 631.72 | 72.33 |
| 44  | 651.18 | 68.95 |
| 43  | 663.07 | 69.63 |

|    |         |       |
|----|---------|-------|
| 42 | 673.56  | 68.57 |
| 41 | 687.47  | 64.05 |
| 40 | 720.99  | 37.43 |
| 39 | 732.72  | 18.18 |
| 38 | 739.21  | 16.26 |
| 37 | 752.08  | 25.62 |
| 36 | 766.01  | 23.16 |
| 35 | 797.22  | 70.46 |
| 34 | 828.95  | 63.61 |
| 33 | 856.45  | 38.7  |
| 32 | 879.13  | 40.21 |
| 31 | 930.11  | 52.31 |
| 30 | 947.53  | 68.98 |
| 29 | 990.24  | 42.09 |
| 28 | 1015.02 | 48.68 |
| 27 | 1039.43 | 33.47 |
| 26 | 1065.04 | 20.3  |
| 25 | 1104.74 | 3.49  |
| 24 | 1138.01 | 23.07 |
| 23 | 1176.34 | 43.39 |
| 22 | 1197.53 | 16.41 |
| 21 | 1222.14 | 15.64 |
| 20 | 1249.38 | 4.24  |
| 19 | 1261.64 | 7.93  |
| 18 | 1269.96 | 11.52 |
| 17 | 1321.1  | 18.27 |
| 16 | 1354.46 | 7.71  |
| 15 | 1389.73 | 19.21 |
| 14 | 1412.66 | 9.99  |
| 13 | 1460.42 | 32.26 |
| 12 | 1501.14 | 32.51 |
| 11 | 1523.58 | 31.4  |
| 10 | 1569.44 | 19.24 |
| 9  | 1596.03 | 6.64  |
| 8  | 1663.33 | 1.13  |
| 7  | 1733.46 | 1.66  |
| 6  | 1975.49 | 76.9  |
| 5  | 2945.27 | 71.21 |
| 4  | 2988.41 | 70.51 |
| 3  | 3091.7  | 53.55 |
| 2  | 3103.16 | 57.41 |
| 1  | 3436.71 | 69.81 |
